# Supplementary material for: Rapid, semi-automated convergent synthesis of low generation triazine dendrimers using microwave assisted reactions
Source: Royal Society of Chemistry journal article supplement (doi:10.1039/c4py00349g), 2014-01-01

# Rapid, Semi-automated Convergent Synthesis of Low Generation Triazine Dendrimers using Microwave Assisted Reactions

Alan E. Enciso, Zachary M. Abid, Eric E. Simanek\*

*Department of Chemistry, Texas Christian University  
Fort Worth, TX 76129*

## Table of Contents

|                                   |    |
|-----------------------------------|----|
| General Experimental              | 3  |
| Compound 1                        | 4  |
| SI Figure 1. $^1\text{H}$ NMR     | 5  |
| SI Figure 2. $^{13}\text{C}$ NMR  | 6  |
| SI Figure 3. Mass Spectra         | 7  |
| Compound 2                        | 8  |
| SI Figure 4. $^1\text{H}$ NMR     | 9  |
| SI Figure 5. $^{13}\text{C}$ NMR  | 10 |
| SI Figure 6. Mass Spectra         | 11 |
| Compound 3                        | 12 |
| SI Figure 7. $^1\text{H}$ NMR     | 13 |
| SI Figure 8. $^{13}\text{C}$ NMR  | 14 |
| SI Figure 9. Mass Spectra         | 15 |
| Compound 4                        | 16 |
| SI Figure 10. $^1\text{H}$ NMR    | 17 |
| SI Figure 11. $^{13}\text{C}$ NMR | 18 |
| SI Figure 12. Mass Spectra        | 19 |
| Compound 5                        | 20 |
| SI Figure 13. $^1\text{H}$ NMR    | 21 |
| SI Figure 14. $^{13}\text{C}$ NMR | 22 |
| SI Figure 15. Mass Spectra        | 23 |
| Compound 6                        | 24 |
| SI Figure 16. $^1\text{H}$ NMR    | 25 |
| SI Figure 17. $^{13}\text{C}$ NMR | 26 |
| SI Figure 18. Mass Spectra        | 27 |
| Compound 7                        | 28 |

|                                         |    |
|-----------------------------------------|----|
| SI Figure 19. $^1\text{H}$ NMR          | 29 |
| SI Figure 20. $^{13}\text{C}$ NMR       | 30 |
| SI Figure 21. Mass Spectra              | 31 |
| Compound 8                              | 32 |
| SI Figure 22. $^1\text{H}$ NMR          | 33 |
| SI Figure 23. $^{13}\text{C}$ NMR       | 34 |
| SI Figure 24. Mass Spectra              | 35 |
| Compound 9                              | 36 |
| SI Figure 25. $^1\text{H}$ NMR          | 37 |
| SI Figure 26. $^{13}\text{C}$ NMR       | 38 |
| SI Figure 27. Mass Spectra              | 39 |
| Compound 10                             | 40 |
| SI Figure 28. $^1\text{H}$ NMR          | 41 |
| SI Figure 29. $^{13}\text{C}$ NMR       | 42 |
| SI Figure 30. Mass Spectra              | 43 |
| Compound 11                             | 44 |
| SI Figure 31. $^1\text{H}$ NMR          | 45 |
| SI Figure 32. $^{13}\text{C}$ NMR       | 46 |
| SI Figure 33. Mass Spectra              | 47 |
| Compound 12                             | 48 |
| SI Figure 34. $^1\text{H}$ NMR          | 49 |
| SI Figure 35. $^{13}\text{C}$ NMR       | 50 |
| SI Figure 36. Mass Spectra              | 51 |
| Compound 13                             | 52 |
| SI Figure 37. $^1\text{H}$ NMR          | 53 |
| SI Figure 38. $^{13}\text{C}$ NMR       | 54 |
| SI Figure 39. Mass Spectra              | 55 |
| Compound 14                             | 56 |
| SI Figure 40. $^1\text{H}$ NMR          | 57 |
| SI Figure 41. $^{13}\text{C}$ NMR       | 58 |
| SI Figure 42. Mass Spectra              | 59 |
| GPC Analysis                            | 60 |
| SI Figure 43. GPC Traces of Compound 3  | 60 |
| SI Figure 44. GPC Traces of Compound 5  | 62 |
| SI Figure 45. GPC Traces of Compound 7  | 64 |
| SI Figure 45. GPC – THF Blank Injection | 66 |

## General Experimental

**Microwave.** A CEM SP Discovery microwave was utilized for these experiments. Reactions were performed in dynamic mode wherein microwave power is modulated to maintain the set-point temperature—here either 60 °C or 95 °C.

**Automated chromatography.** A CombiFlash RF automatic chromatographer (Teledyne ISCO) was used for these experiments. The separations were performed using a solid loading method in a 25 g preloaded cartridge.

**Compound 1.** *N*-BOC-4,7,10-trioxa-1,13-tridecanediamine (4.03 g, 12.6 mmol) was added to a solution of cyanuric chloride (1.06 g, 5.72 mmol) in THF (50 mL). Afterwards DIPEA (4.38 mL, 13.2 mmol) was added dropwise. The solution was stirred for 2 minutes in order to allow reagents to mix. Then, the solution was irradiated in the microwave while stirring for 10 minutes at 60°C using dynamic mode. The crude product was purified automatic chromatographer. The solvent system (in column volumes) used was the following: 4 CV (100% Hexanes to 100% EtoAc), 20CV(100% EtoAc) to give **1** (4.08 g, 95%) as a clear oil. <sup>1</sup>H NMR (400 MHz, CDCl<sub>3</sub>) δ 3.67-3.45 (m, 28H, CH<sub>2</sub>OCH<sub>2</sub>CH<sub>2</sub>OCH<sub>2</sub>CH<sub>2</sub>OCH<sub>2</sub>, C<sub>3</sub>N<sub>3</sub>-NHCH<sub>2</sub>CH<sub>2</sub>CH<sub>2</sub>O), 3.24 (br m, 4H, BocNHCH<sub>2</sub>), 1.88-1.75 (m, 8H, OCH<sub>2</sub>CH<sub>2</sub>CH<sub>2</sub>), 1.44 (s, 18H, C(CH<sub>3</sub>)<sub>3</sub>); <sup>13</sup>C NMR (100 MHz, CDCl<sub>3</sub>) δ 168.9, 168.0, 165.9 (C<sub>3</sub>N<sub>3</sub>), 156.1 (CO), 78.8 (C(CH<sub>3</sub>)<sub>3</sub>), 70.5 (OCH<sub>2</sub>CH<sub>2</sub>O), 70.2 (two lines, OCH<sub>2</sub>CH<sub>2</sub>O), 69.5 (CH<sub>2</sub>CH<sub>2</sub>CH<sub>2</sub>O), 69.3 (CH<sub>2</sub>CH<sub>2</sub>CH<sub>2</sub>O), 38.4 (CH<sub>2</sub>CH<sub>2</sub>CH<sub>2</sub>O), 29.5 (CH<sub>2</sub>CH<sub>2</sub>CH<sub>2</sub>O), 28.6 (NHCH<sub>2</sub>CH<sub>2</sub>CH<sub>2</sub>O), 28.4 (C(CH<sub>3</sub>)<sub>3</sub>); MS (ESI-TOF) calcd for C<sub>33</sub>H<sub>62</sub>ClN<sub>7</sub>O<sub>10</sub> 751.4247, found 752.4382(M + H)<sup>+</sup>.

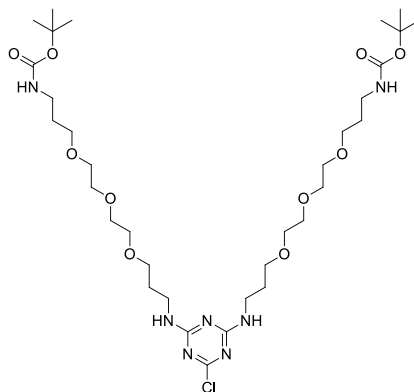

Figure S1.  $^1\text{H}$  NMR Spectrum of **1**.

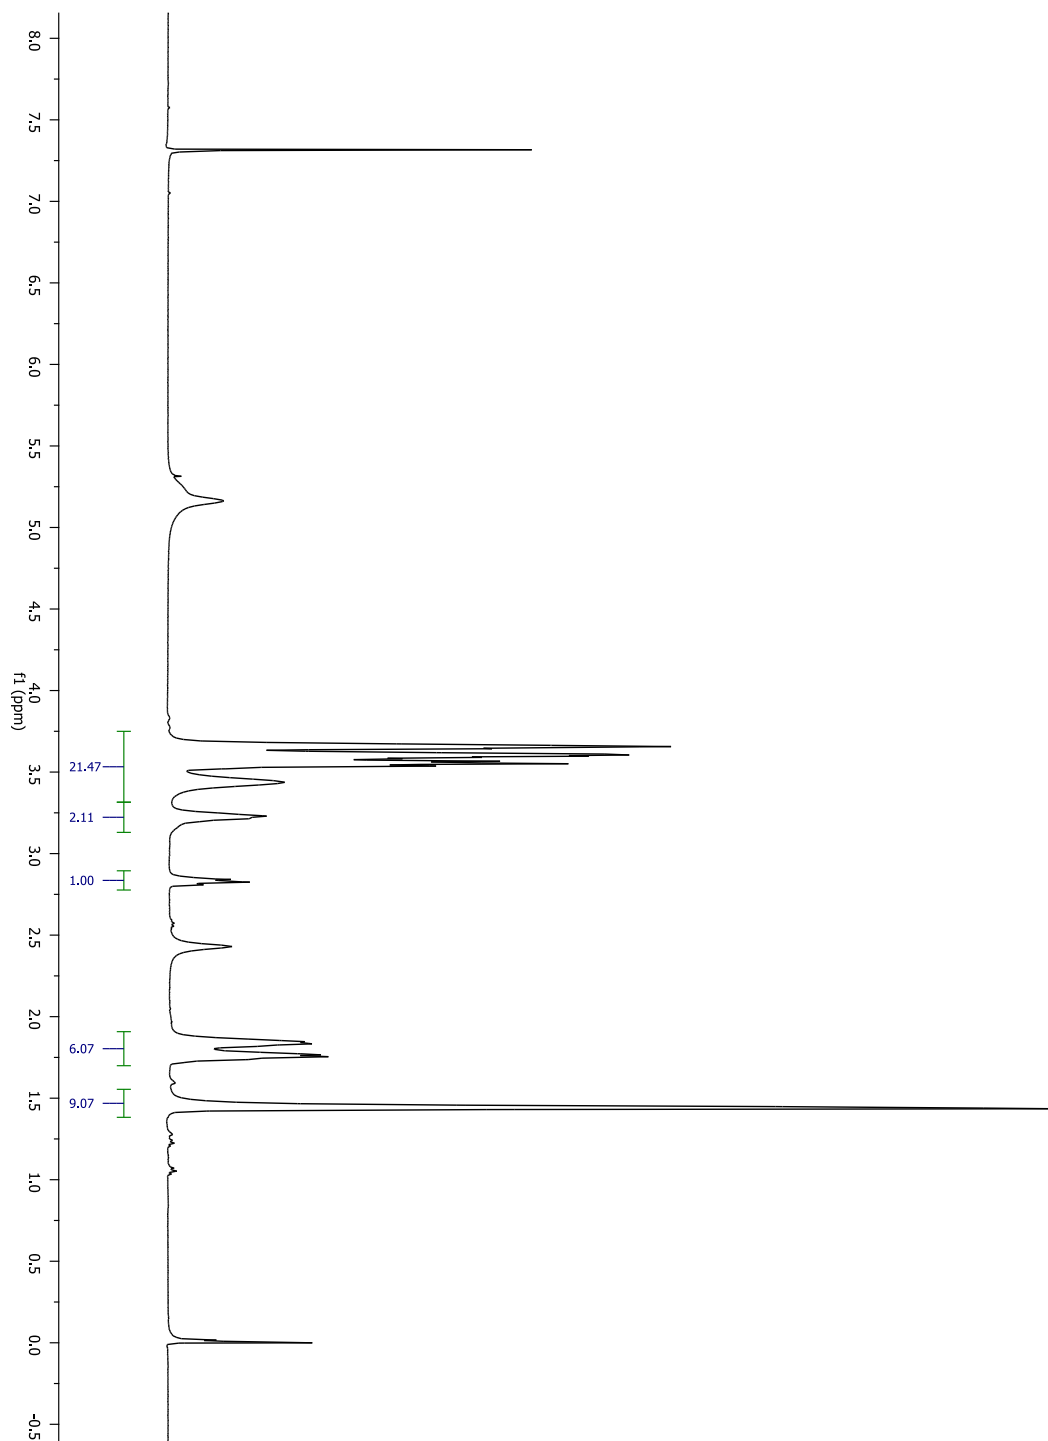

Figure S2.  $^{13}\text{C}$  NMR Spectrum of **1**.

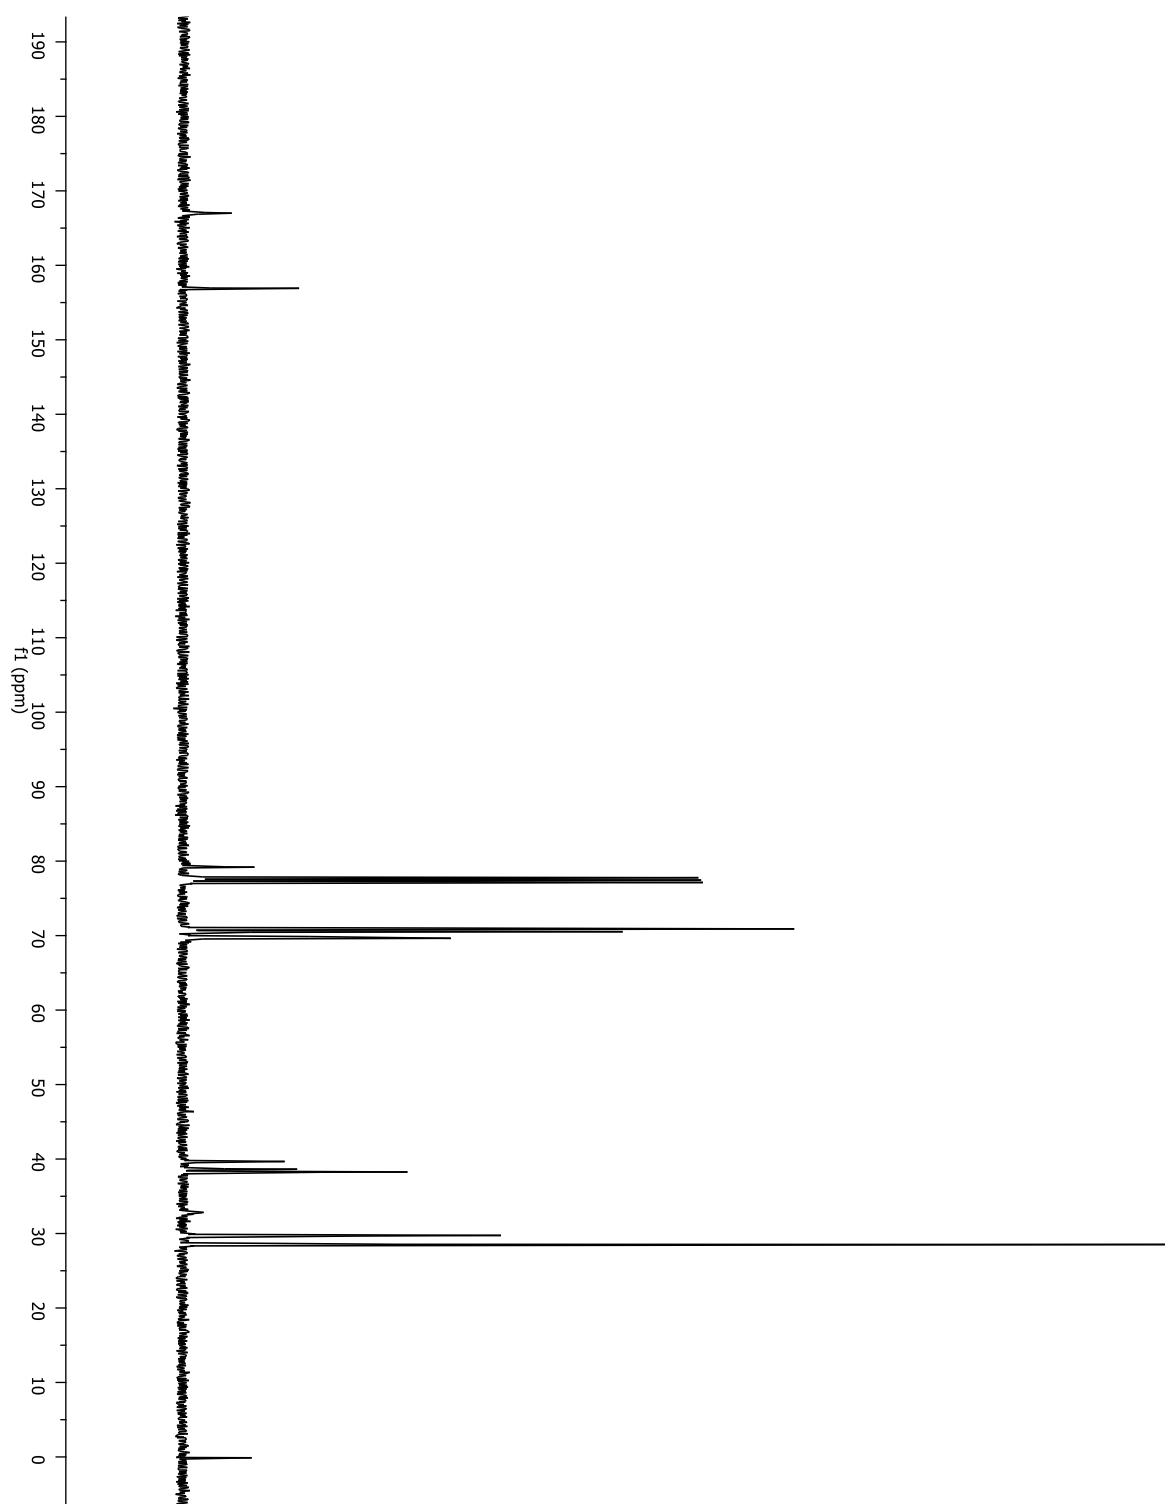

Figure S3. Mass Spectrum of 1.

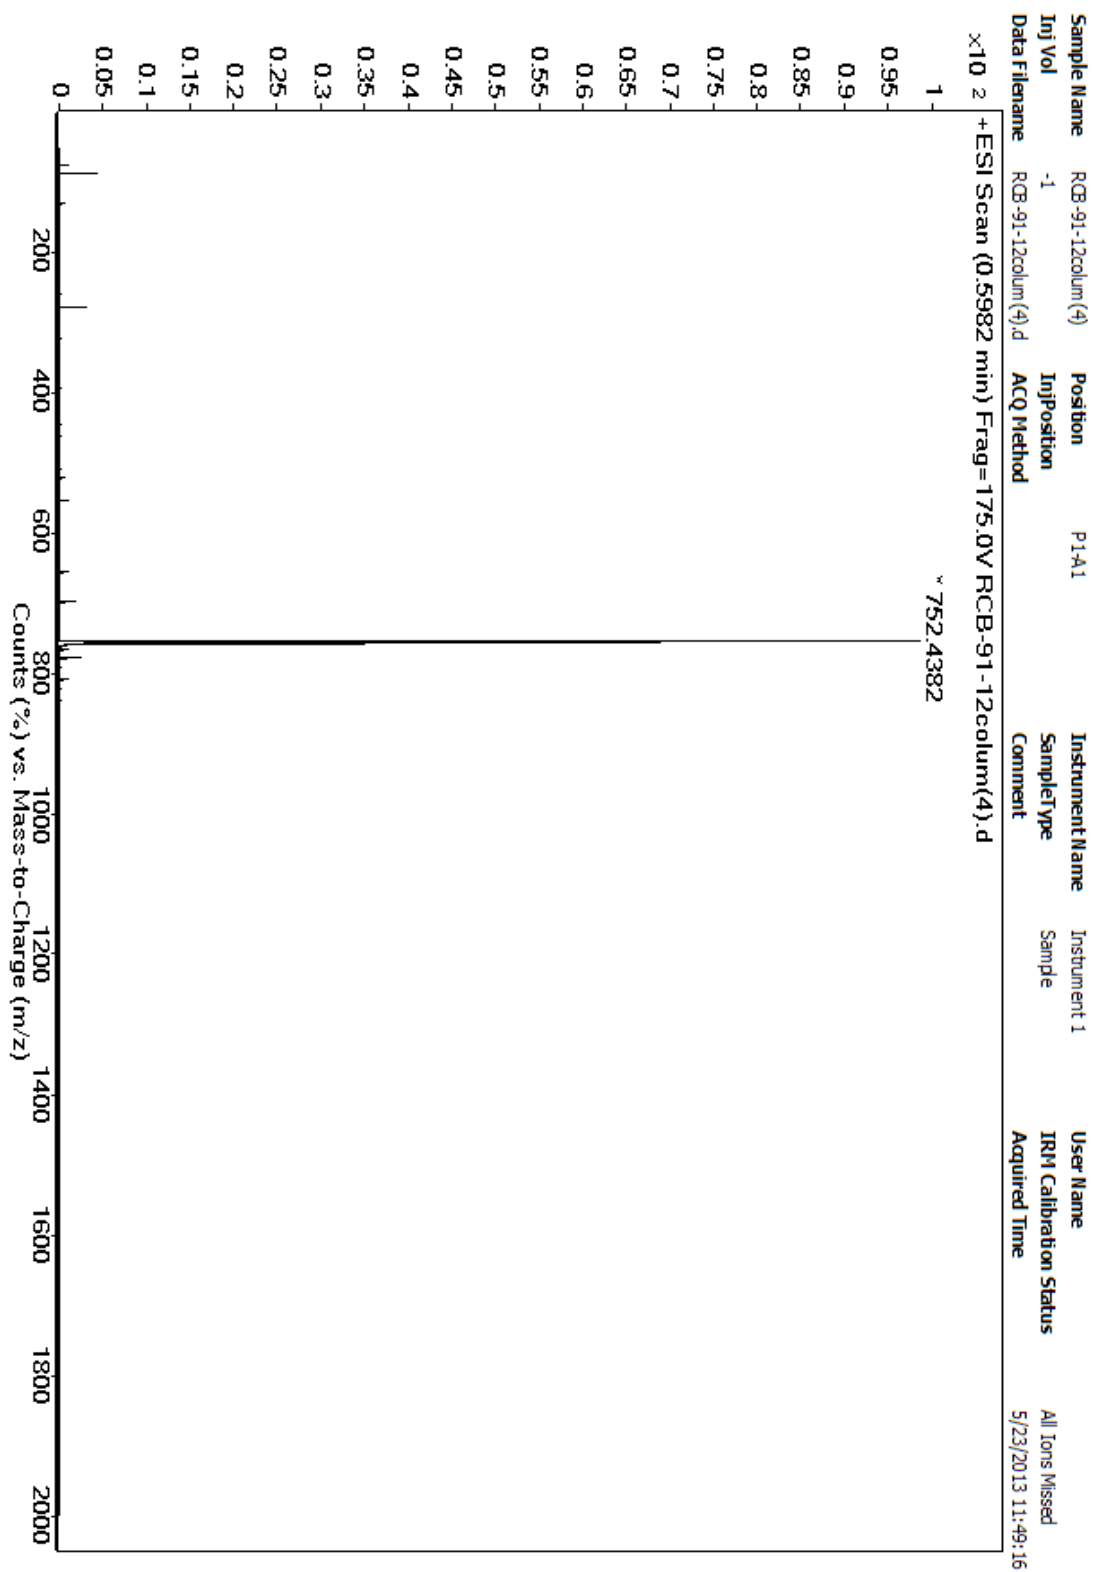

**Compound 2.** A solution of **1** (6.66g, 8.85 mmol) with 4,7,10-trioxa-1,13-tridecanediamine (7.8 g, 35.4 mmol) and Cs<sub>2</sub>CO<sub>3</sub> (5.77g, 17.7 mmol) in 40 mL of 1,4 dioxane was stirred for 2 minutes. Then, the solution was irradiated in the microwave while stirring for 30 minutes at 95°C and then evaporated under vacuum. The residue was dissolved in dichloromethane, washed with brine solution and dried over MgSO<sub>4</sub>, filtered, and evaporated under vacuum. The separation was performed using a solid loading method in a 25 g preloaded cartridge. The solvent system (in column volumes) used was the following: 30CV (90:10= DCM: MeOH), 20CV (85:15= DCM: MeOH), 15CV (5:1:1% = DCM: MeOH: NH<sub>4</sub>OH) to give **5** (7.2 g, 87%) as a clear oil. <sup>1</sup>H NMR (400 MHz, CDCl<sub>3</sub>) δ 3.63-3.34 (m, 42H, CH<sub>2</sub>OCH<sub>2</sub>CH<sub>2</sub>OCH<sub>2</sub>CH<sub>2</sub>OCH<sub>2</sub>, C<sub>3</sub>N<sub>3</sub>-NHCH<sub>2</sub>CH<sub>2</sub>CH<sub>2</sub>O), 3.20 (m, 4H, BocNHCH<sub>2</sub>), 2.79 (t, *J* = 6.6, 2H, OCH<sub>2</sub>CH<sub>2</sub>CH<sub>2</sub>NH<sub>2</sub>), 1.82-1.73 (m, 12H, OCH<sub>2</sub>CH<sub>2</sub>CH<sub>2</sub>), 1.40 (s, 18H, C(CH<sub>3</sub>)<sub>3</sub>); <sup>13</sup>C NMR (100 MHz, CDCl<sub>3</sub>) δ 166.0 (C<sub>3</sub>N<sub>3</sub>), 156.2 (CO), 78.8 (C(CH<sub>3</sub>)<sub>3</sub>), 70.6 (OCH<sub>2</sub>CH<sub>2</sub>O), 70.3 (OCH<sub>2</sub>CH<sub>2</sub>O), 70.2 (two lines, OCH<sub>2</sub>CH<sub>2</sub>O), 69.5 (CH<sub>2</sub>CH<sub>2</sub>CH<sub>2</sub>O), 69.3 (CH<sub>2</sub>CH<sub>2</sub>CH<sub>2</sub>O), 39.5 (CH<sub>2</sub>CH<sub>2</sub>CH<sub>2</sub>O), 38.5 (CH<sub>2</sub>CH<sub>2</sub>CH<sub>2</sub>O), 38.1 (CH<sub>2</sub>CH<sub>2</sub>CH<sub>2</sub>O), 32.7 (OCH<sub>2</sub>CH<sub>2</sub>CH<sub>2</sub>NH<sub>2</sub>), 29.7 (NHCH<sub>2</sub>CH<sub>2</sub>CH<sub>2</sub>O), 28.5 (C(CH<sub>3</sub>)<sub>3</sub>); MS (ESI-TOF) calcd for C<sub>43</sub>H<sub>85</sub>N<sub>9</sub>O<sub>13</sub> 935.6267, found 936.6724(M + H)<sup>+</sup>.

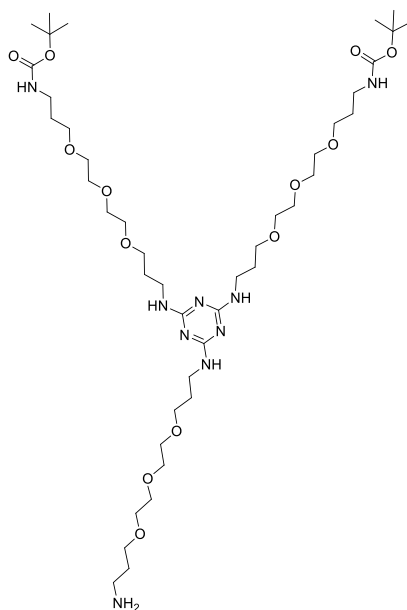



Figure S4.  $^1\text{H}$  NMR Spectrum of **2**.

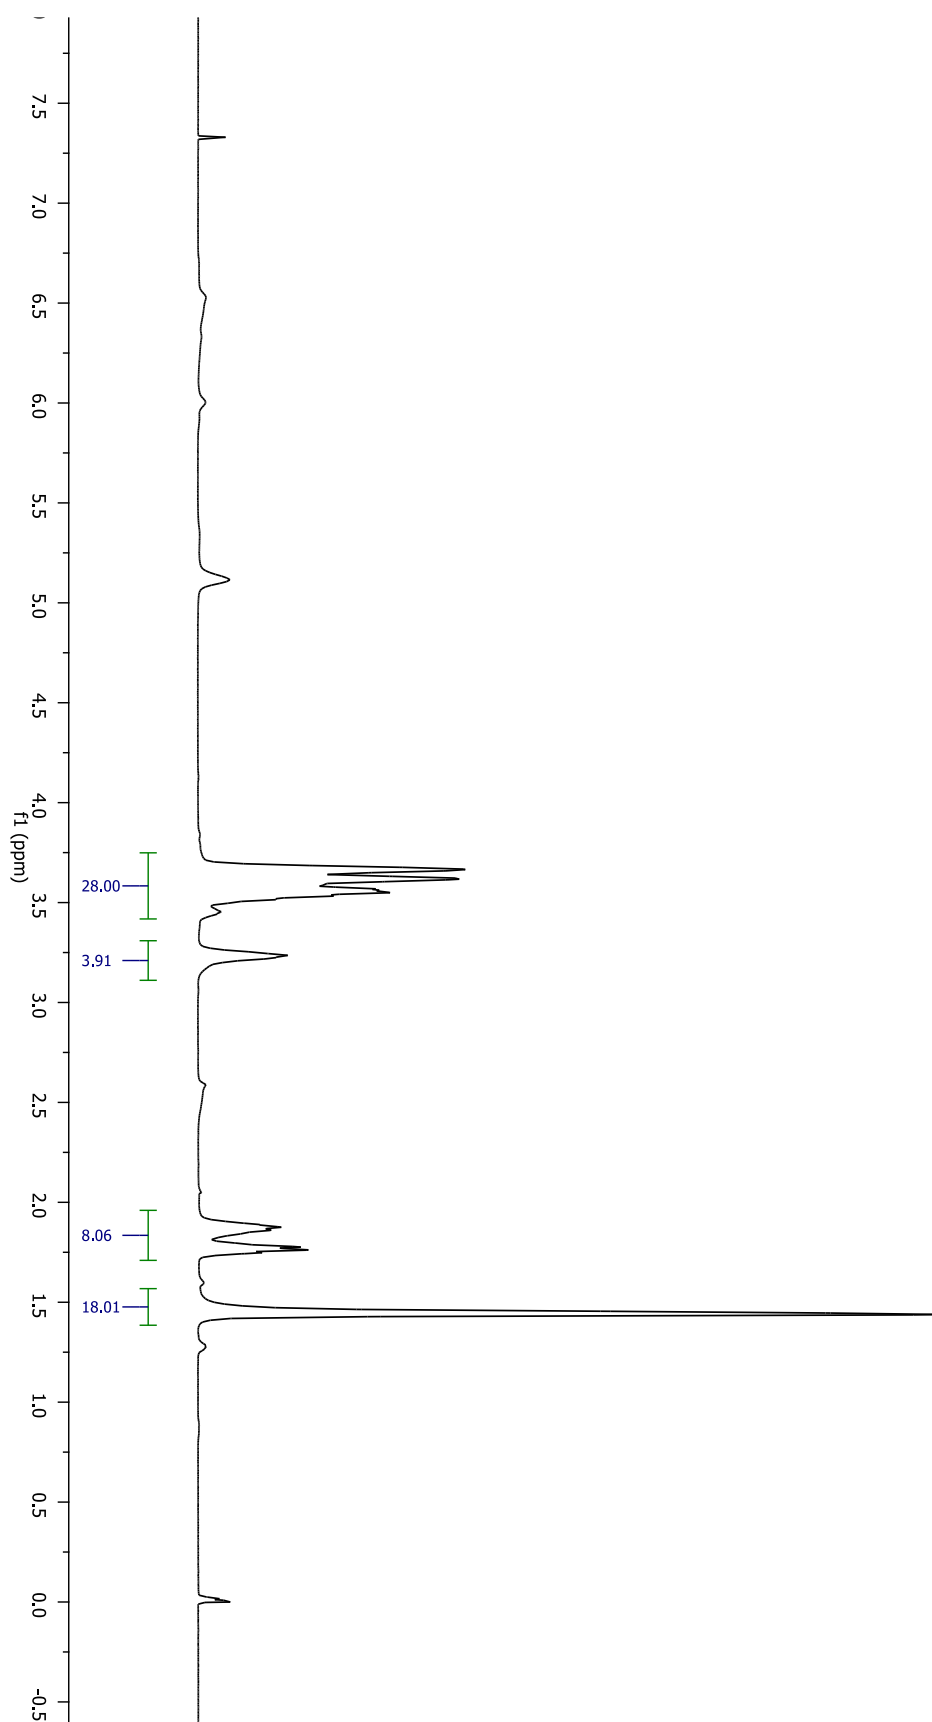

Figure S5.  $^{13}\text{C}$  NMR Spectrum of **2**.

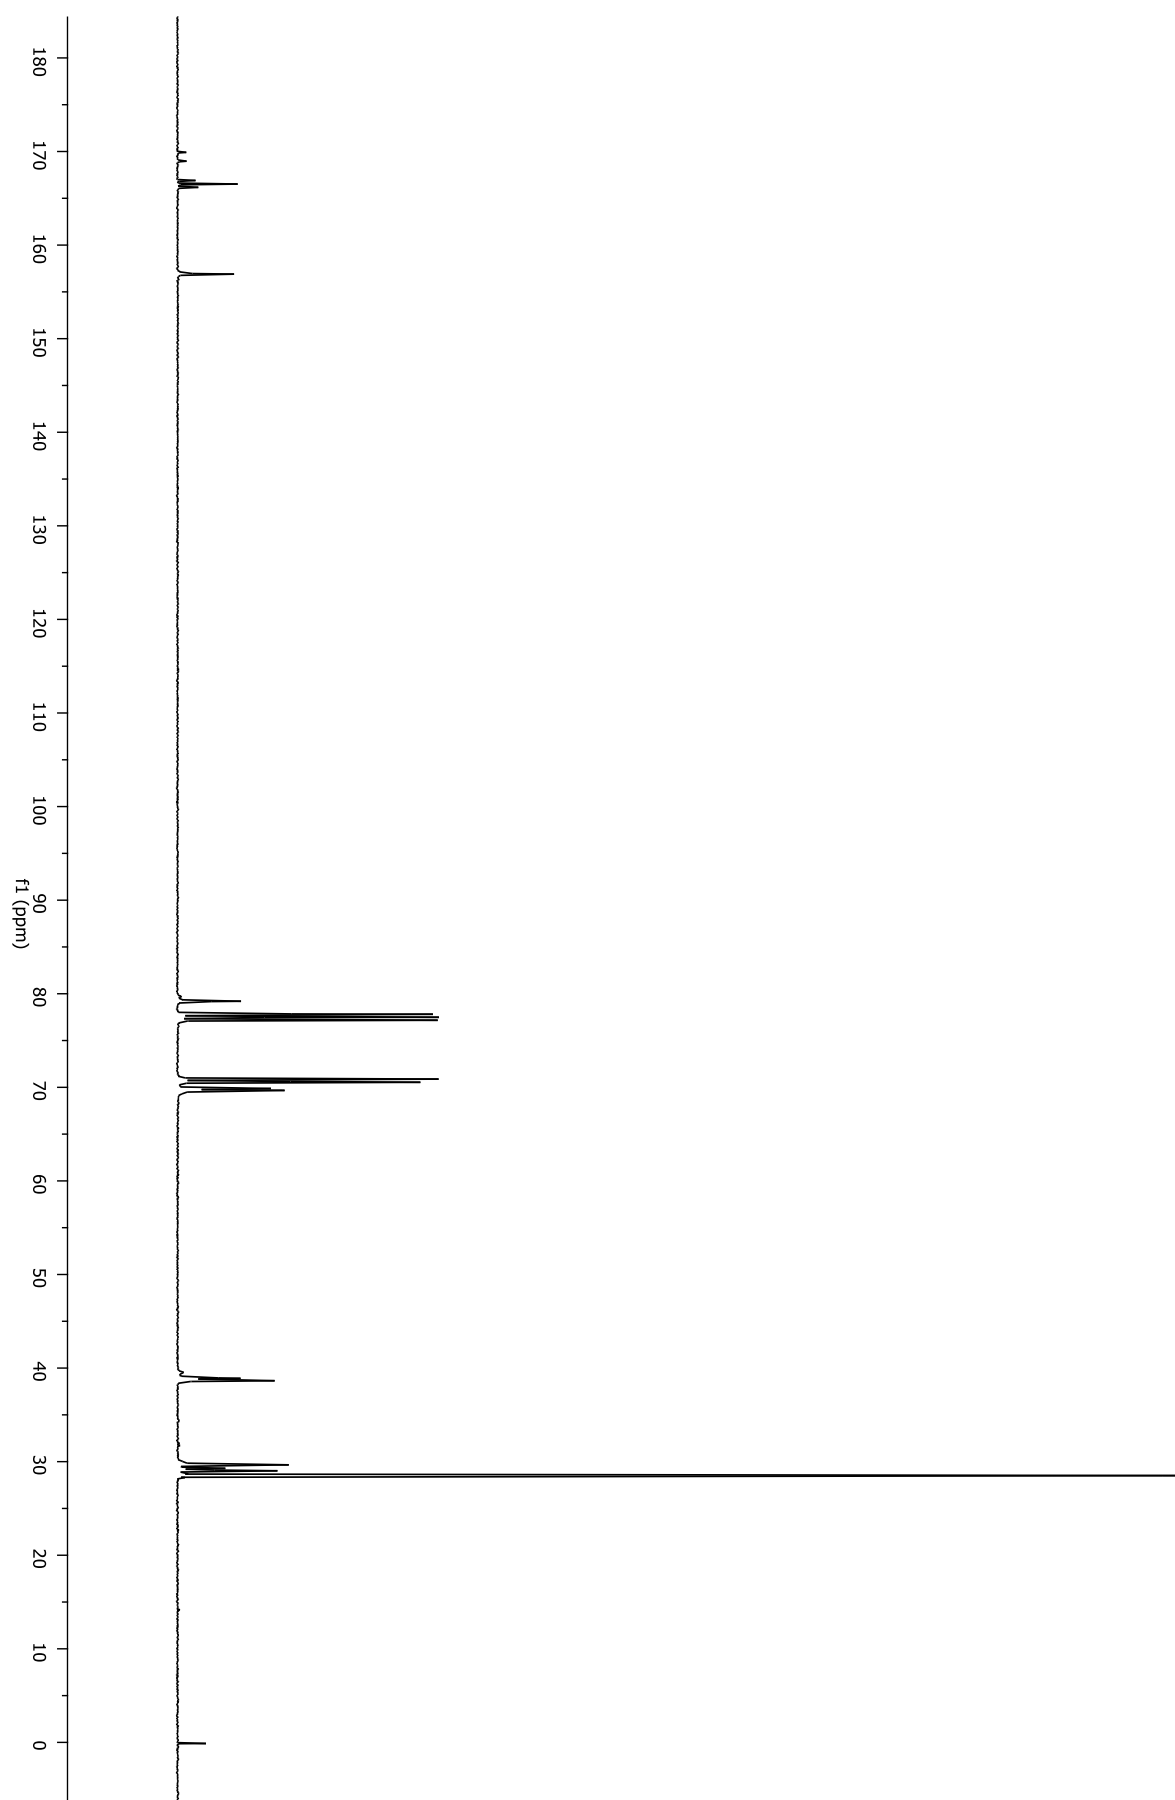

Figure S6. Mass Spectrum of 2

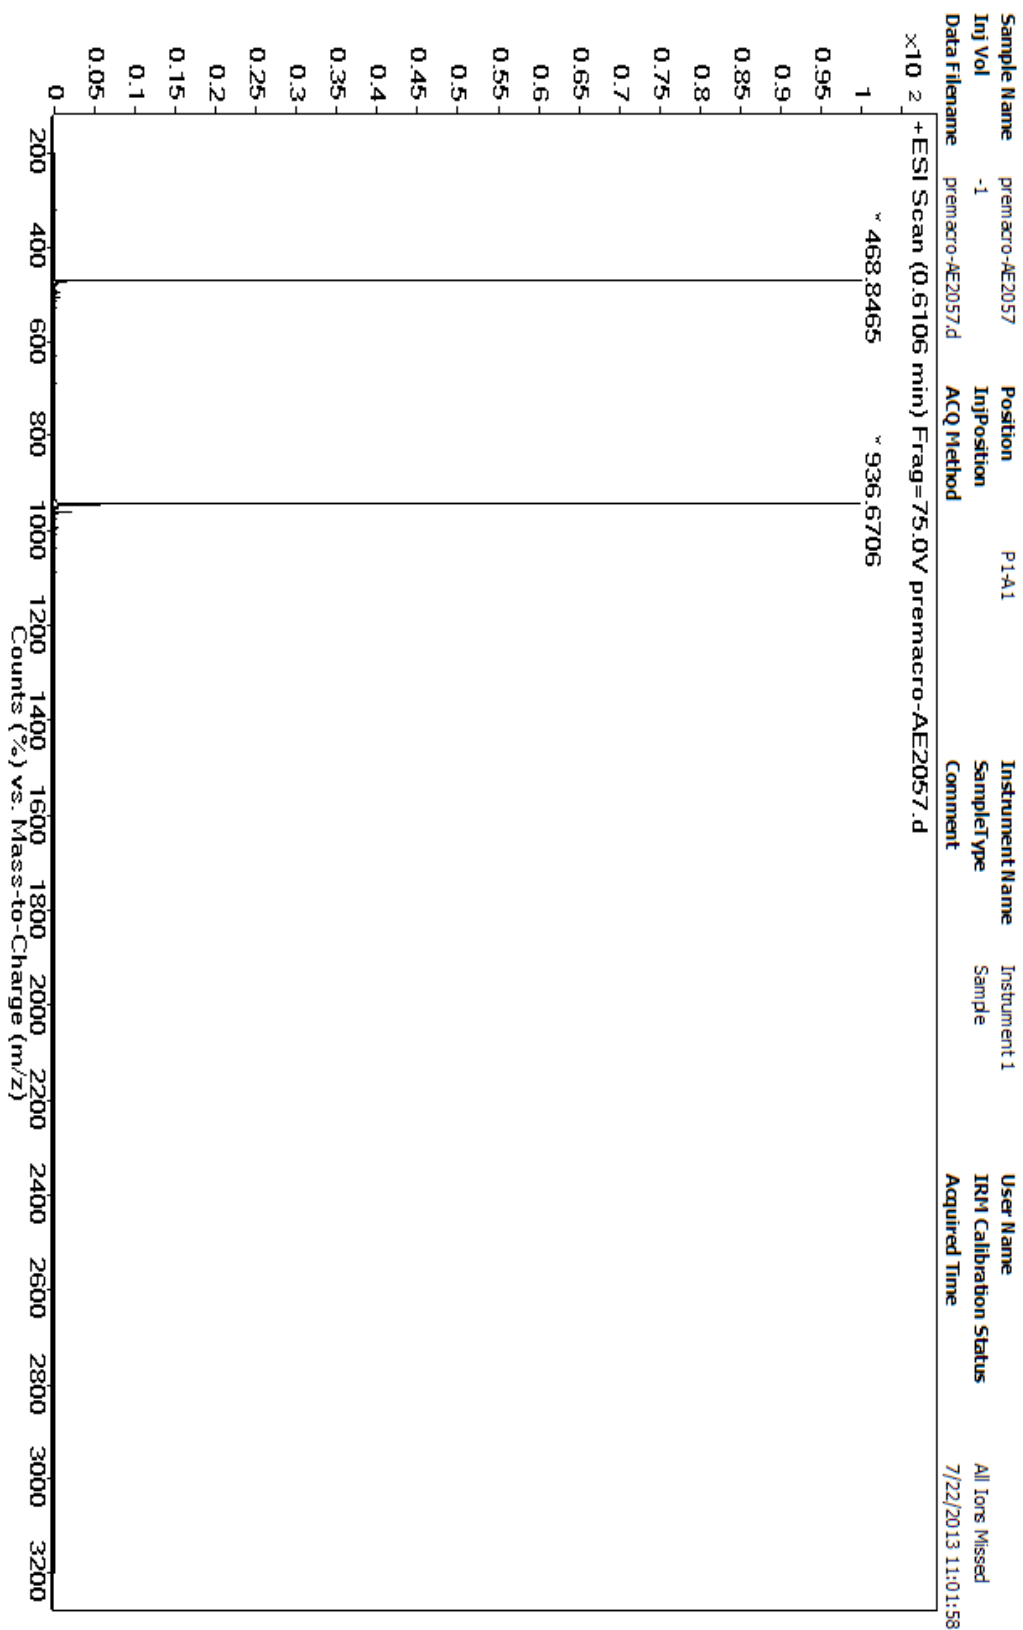

**Compound 3 (macromonomer).** Compound 2 (4.08 g, 4.36 mmol) was added to a solution of cyanuric chloride (0.366 g, 1.98 mmol) in THF (20 mL). Afterwards DIPEA (3.2 mL, 9.32 mmol) was added dropwise, and the solution was stirred for 2 minutes in order to allow reagents to mix. Then, the solution was irradiated in the microwave while stirring for 10 minutes at 60°C using dynamic mode. The solvent system (in column volumes) used was the following: 1 CV (100% DCM to 95:5= DCM: MeOH ), 15CV (95:5= DCM: MeOH), 10CV (90:10= DCM: MeOH), 20CV (85:15= DCM: MeOH) to give **1** (3.85g, 98%) as a clear oil. <sup>1</sup>H NMR (400 MHz, CDCl<sub>3</sub>) δ 3.65-3.43 (m, 88H, CH<sub>2</sub>OCH<sub>2</sub>CH<sub>2</sub>OCH<sub>2</sub>CH<sub>2</sub>OCH<sub>2</sub>, C<sub>3</sub>N<sub>3</sub>-NHCH<sub>2</sub>CH<sub>2</sub>CH<sub>2</sub>O), 3.21 (br m, 8H, BocNHCH<sub>2</sub>), 1.83-1.70 (m, 24H, OCH<sub>2</sub>CH<sub>2</sub>CH<sub>2</sub>), 1.44 (s, 36H, C(CH<sub>3</sub>)<sub>3</sub>); <sup>13</sup>C NMR (100 MHz, CDCl<sub>3</sub>) δ 165.9 (C<sub>3</sub>N<sub>3</sub>), 165.6 (C<sub>3</sub>N<sub>3</sub>), 156.1 (CO), 78.8 (C(CH<sub>3</sub>)<sub>3</sub>), 70.5 (OCH<sub>2</sub>CH<sub>2</sub>O), 70.2 (two lines, OCH<sub>2</sub>CH<sub>2</sub>O), 69.5 (CH<sub>2</sub>CH<sub>2</sub>CH<sub>2</sub>O), 69.3 (CH<sub>2</sub>CH<sub>2</sub>CH<sub>2</sub>O), 38.4 (CH<sub>2</sub>CH<sub>2</sub>CH<sub>2</sub>O), 38.1 (CH<sub>2</sub>CH<sub>2</sub>CH<sub>2</sub>O), 29.6 (NHCH<sub>2</sub>CH<sub>2</sub>CH<sub>2</sub>O), 28.4 (C(CH<sub>3</sub>)<sub>3</sub>); MS (ESI-TOF) calcd for C<sub>89</sub>H<sub>168</sub>ClN<sub>21</sub>O<sub>26</sub> 1982.2158, found 1984.4671 (M + H)<sup>+</sup>.

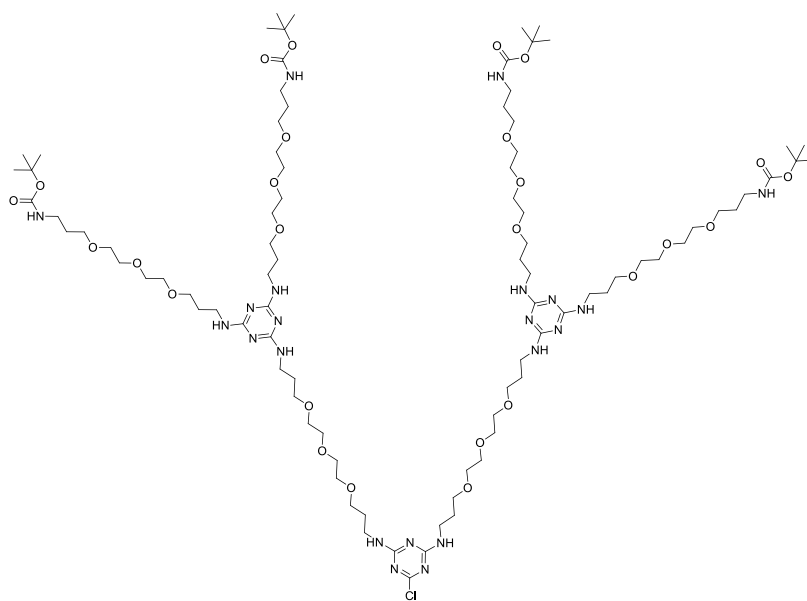

Figure S7.  $^1\text{H}$  NMR Spectrum of **3**.

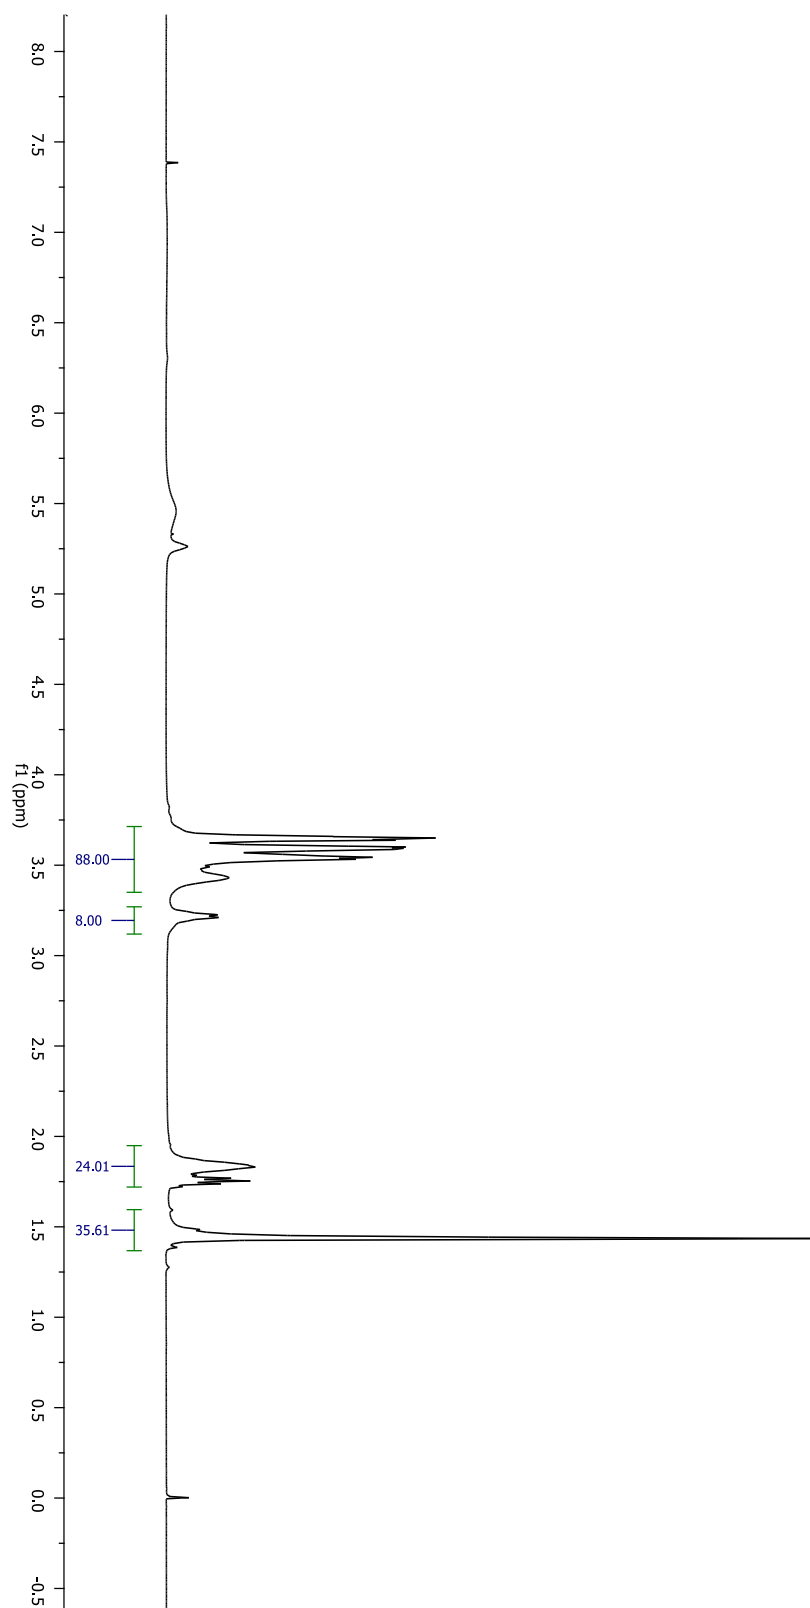

Figure S8.  $^{13}\text{C}$  NMR Spectrum of **3**.

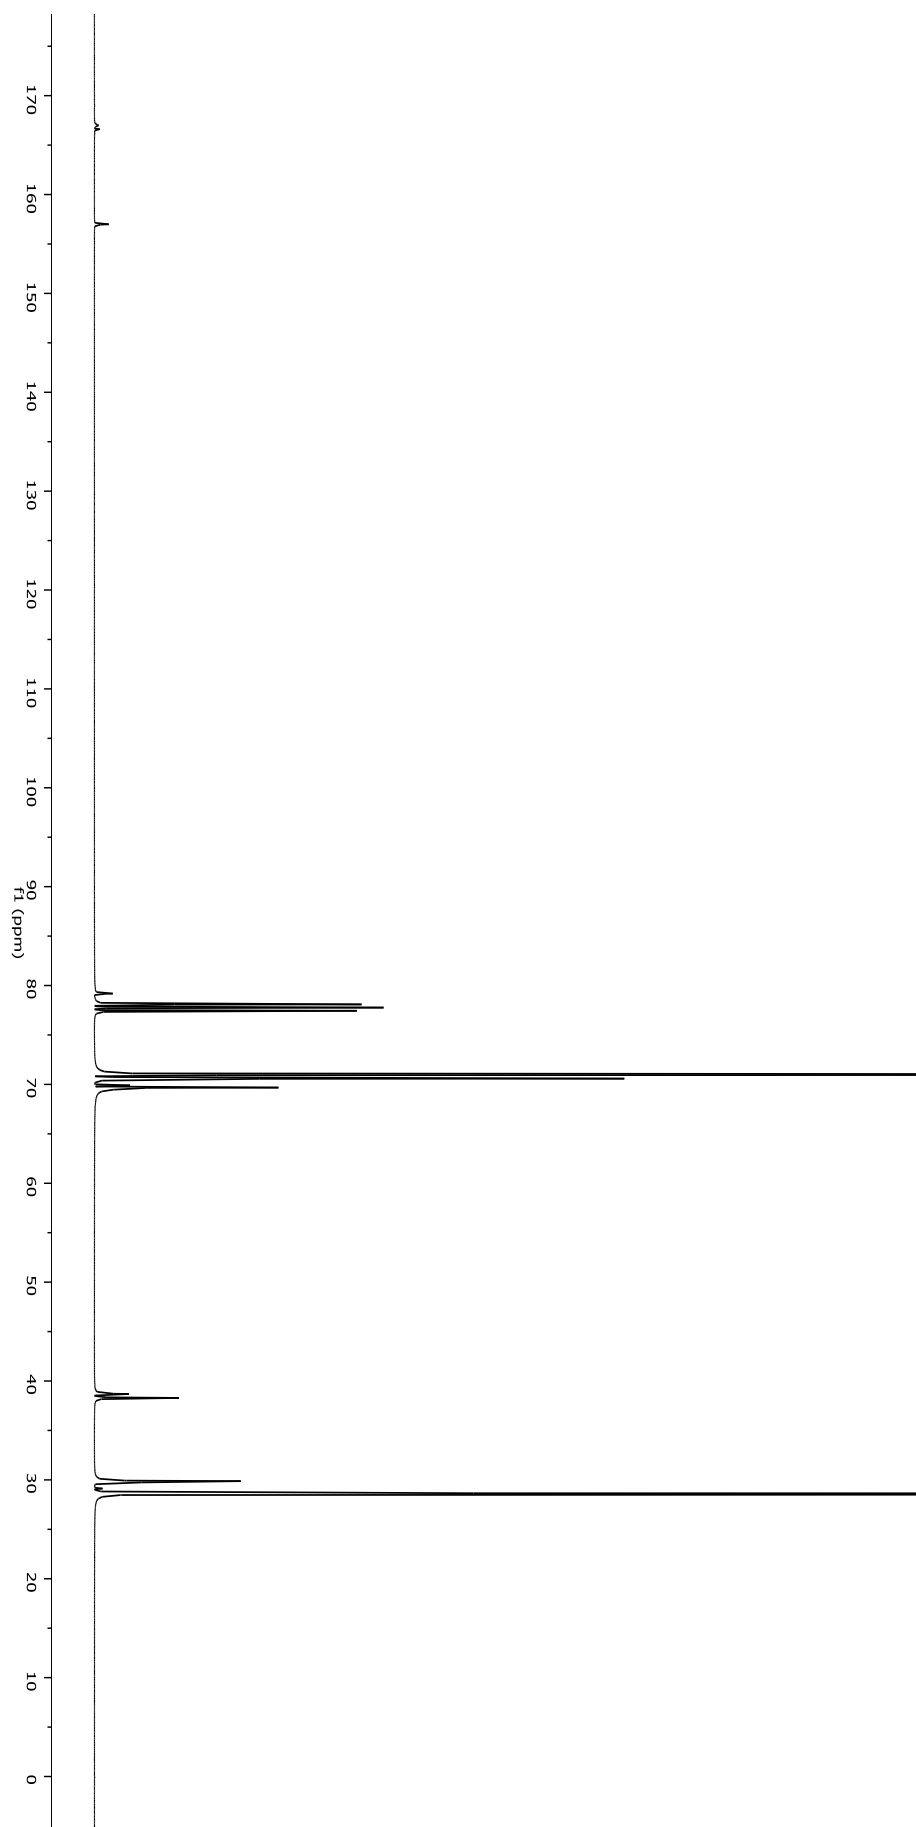

Figure S9. Mass Spectrum of **3**. Doubly and triply charged species are observed.

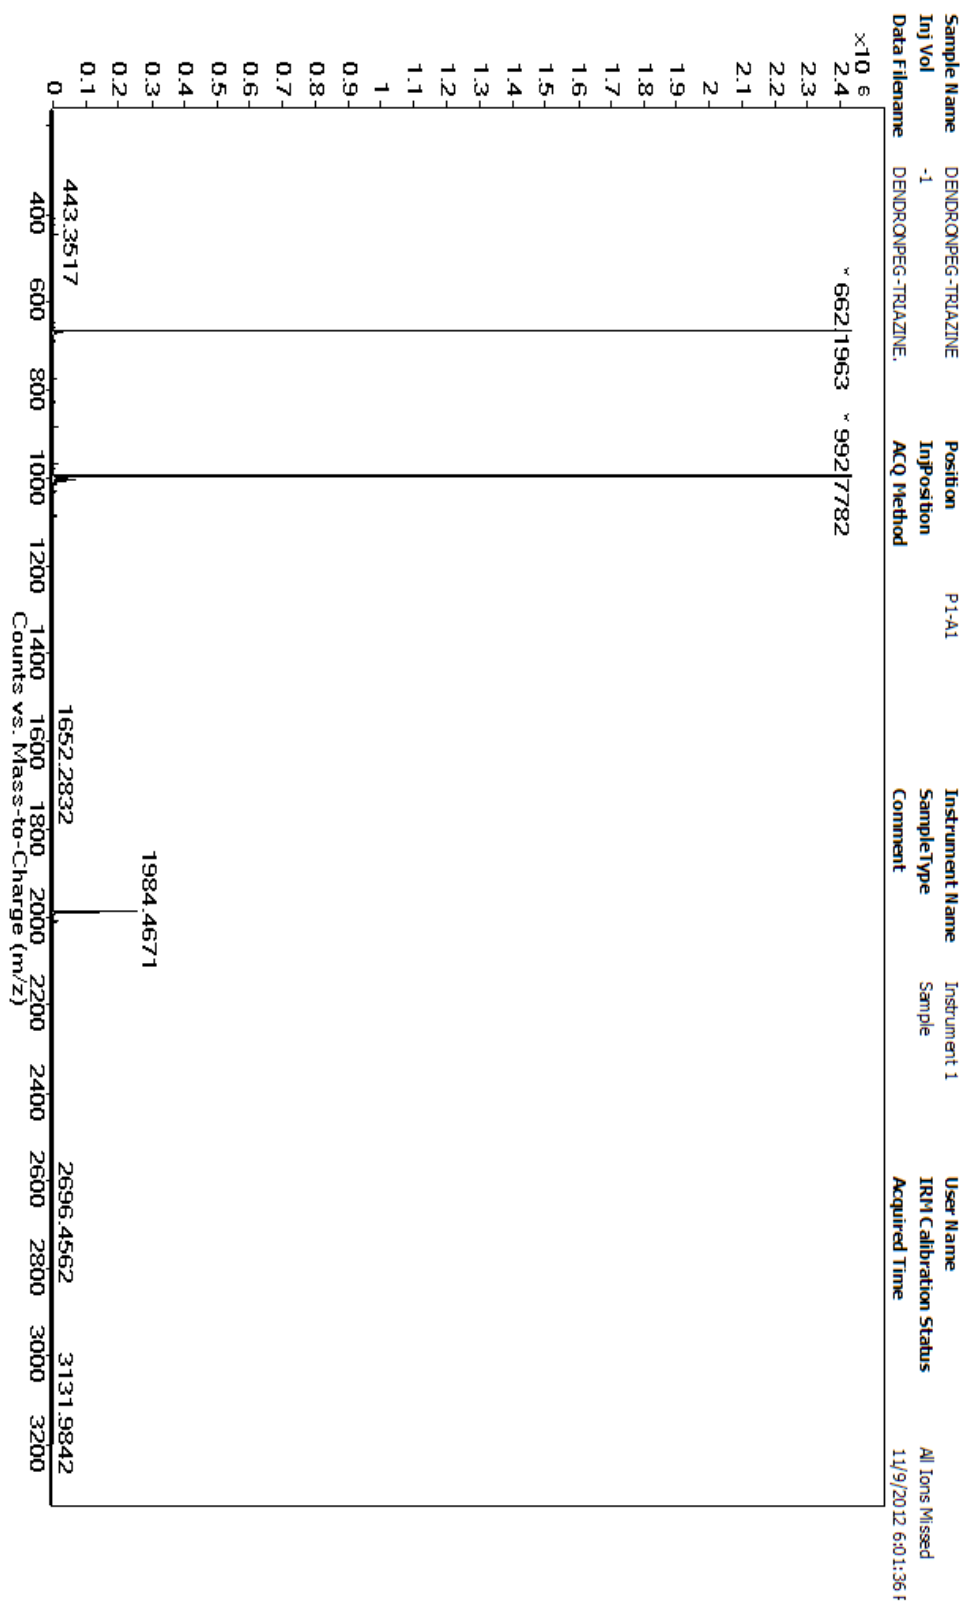

**Compound 4 (G1.5)** A solution of **1** (2.043g, 1.03 mmol) with 4,7,10-trioxa-1,13-tridecanediamine (2.27g, 10.3 mmol) and Cs<sub>2</sub>CO<sub>3</sub> (0.67g, 2.06 mmol) in 10 mL of 1,4 dioxane was stirred for 2 minutes. Then, the solution was irradiated in the microwave while stirring for 30 minutes at 95°C using dynamic mode and then evaporated under vacuum. The residue was dissolved in dichloromethane, washed with brine solution and dried over MgSO<sub>4</sub>, filtered, and evaporated under vacuum. The crude was purified by automated chromatography. The solvent system (in column volumes) used was the following: 1CV (100% DCM), 3CV (100% DCM to 90:10= DCM: MeOH), 10CV (90:10= DCM: MeOH), 2CV (90:10= DCM: MeOH to 85:15= DCM: MeOH), 2CV (85:15= DCM: MeOH to 80:20= DCM: MeOH), 5CV (80:20= DCM: MeOH), 10CV (5:1:1% = DCM: MeOH: NH<sub>4</sub>OH) to give **4** (1.89g, 85%) as a clear oil. <sup>1</sup>H NMR (300 MHz, CDCl<sub>3</sub>) δ 3.64-3.46 (m, 102H, CH<sub>2</sub>OCH<sub>2</sub>CH<sub>2</sub>OCH<sub>2</sub>CH<sub>2</sub>OCH<sub>2</sub>, C<sub>3</sub>N<sub>3</sub>-NHCH<sub>2</sub>CH<sub>2</sub>CH<sub>2</sub>O), 3.21 (br m, 8H, BocNHCH<sub>2</sub>), 2.0 (m, 2H, NH<sub>2</sub>CH<sub>2</sub>CH<sub>2</sub>CH<sub>2</sub>O) 1.84-1.73 (m, 28H, OCH<sub>2</sub>CH<sub>2</sub>CH<sub>2</sub>), 1.43 (s, 36H, C(CH<sub>3</sub>)<sub>3</sub>); <sup>13</sup>C NMR (100 MHz, CDCl<sub>3</sub>) δ 167.11 (C<sub>3</sub>N<sub>3</sub>), 157.06 (CO), 79.28 (C(CH<sub>3</sub>)<sub>3</sub>), 71.01 (OCH<sub>2</sub>CH<sub>2</sub>O), 70.7 (two lines, OCH<sub>2</sub>CH<sub>2</sub>O), 69.97 (CH<sub>2</sub>CH<sub>2</sub>CH<sub>2</sub>O), 69.67 (CH<sub>2</sub>CH<sub>2</sub>CH<sub>2</sub>O), 39.77 (NH<sub>2</sub>CH<sub>2</sub>CH<sub>2</sub>CH<sub>2</sub>O), 38.75 (CH<sub>2</sub>CH<sub>2</sub>CH<sub>2</sub>O), 38.34 (CH<sub>2</sub>CH<sub>2</sub>CH<sub>2</sub>O), 32.73 (NH<sub>2</sub>CH<sub>2</sub>CH<sub>2</sub>CH<sub>2</sub>O), 29.87 (NHCH<sub>2</sub>CH<sub>2</sub>CH<sub>2</sub>O), 28.64 (C(CH<sub>3</sub>)<sub>3</sub>); MS (ESI-TOF) calcd for C<sub>99</sub>H<sub>191</sub>N<sub>23</sub>O<sub>29</sub> 2166.4178, found 2168.4939 (M + H)<sup>+</sup>.

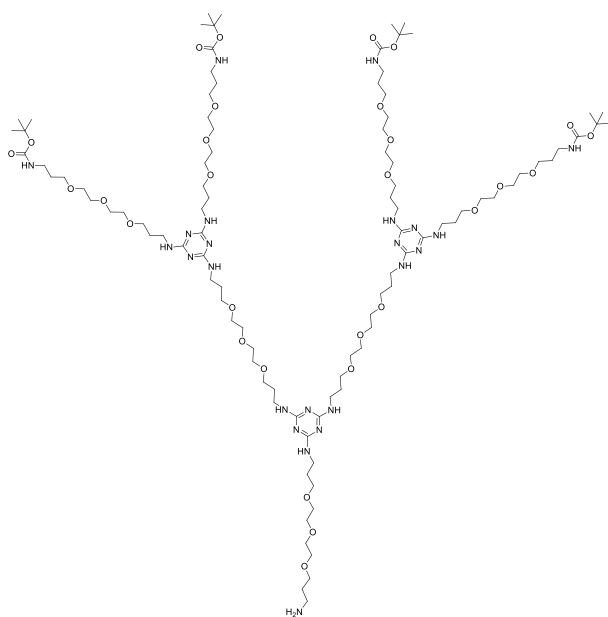



Figure S10.  $^1\text{H}$  NMR Spectrum of **4**.

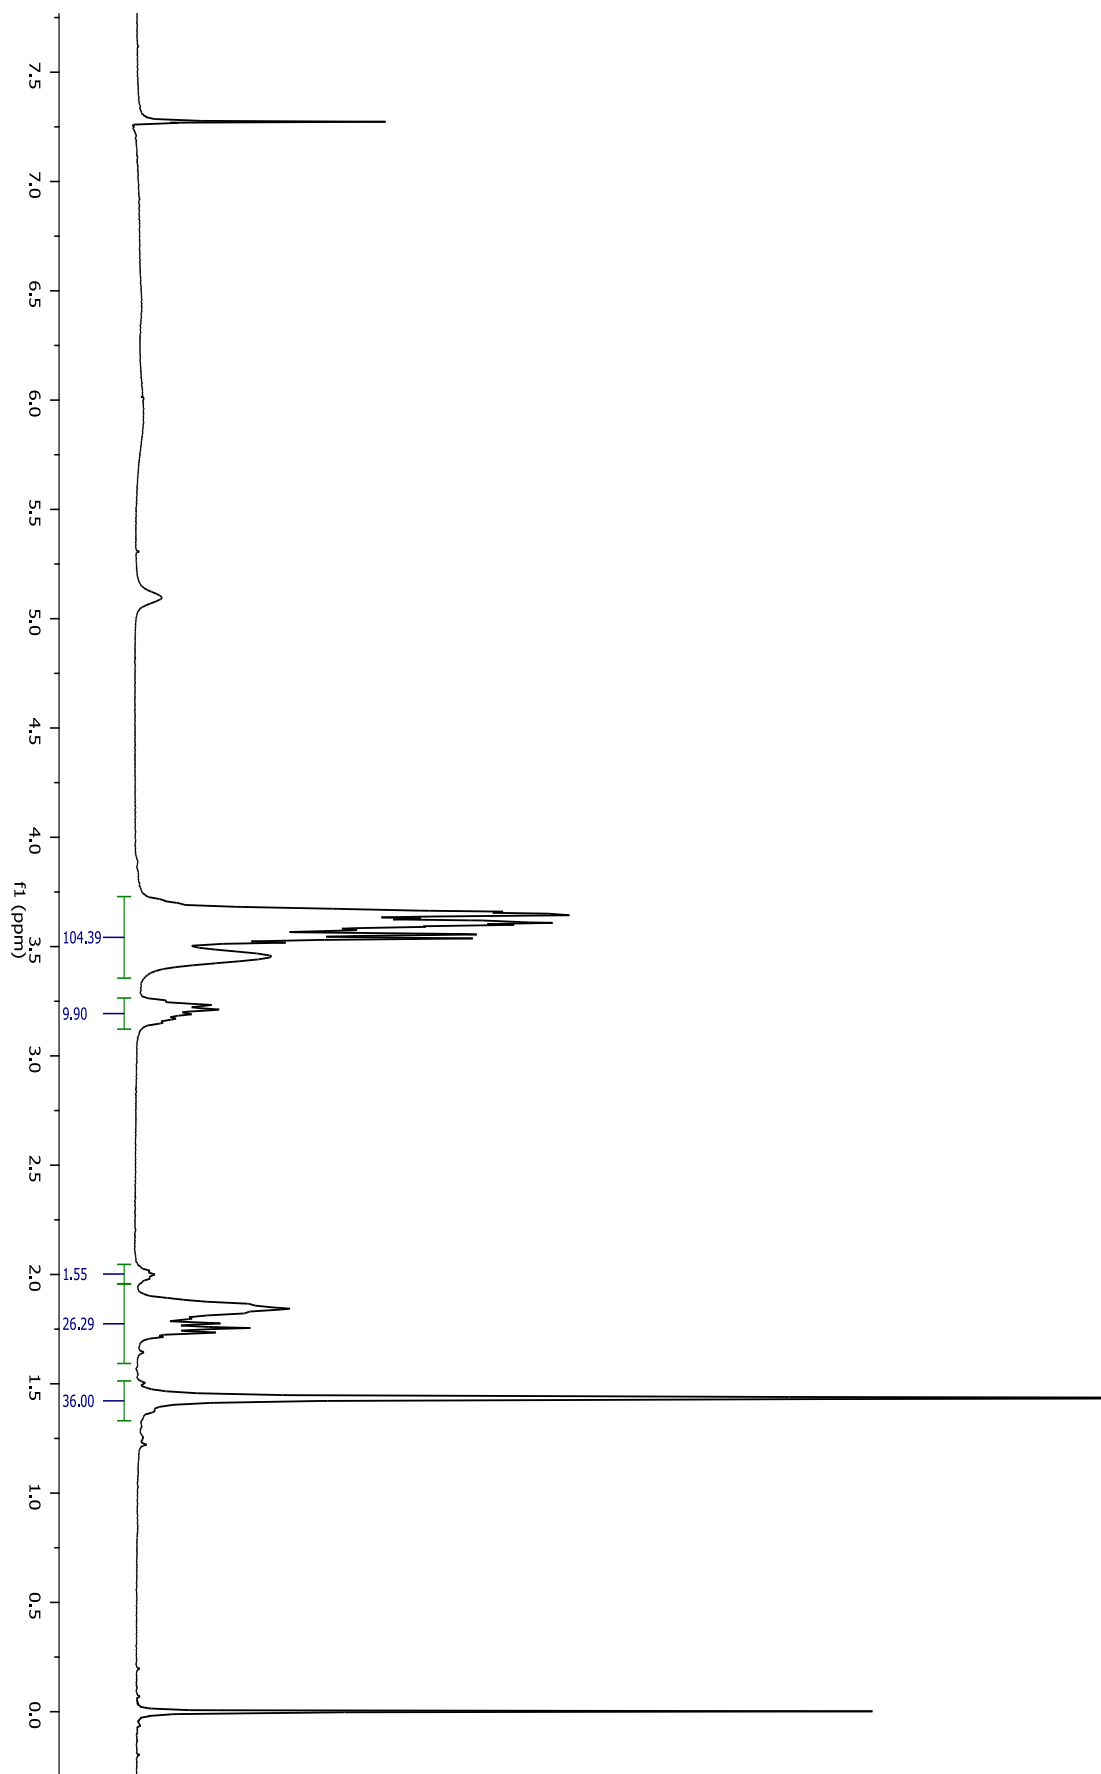

Figure S11.  $^{13}\text{C}$  NMR Spectrum of **4**.

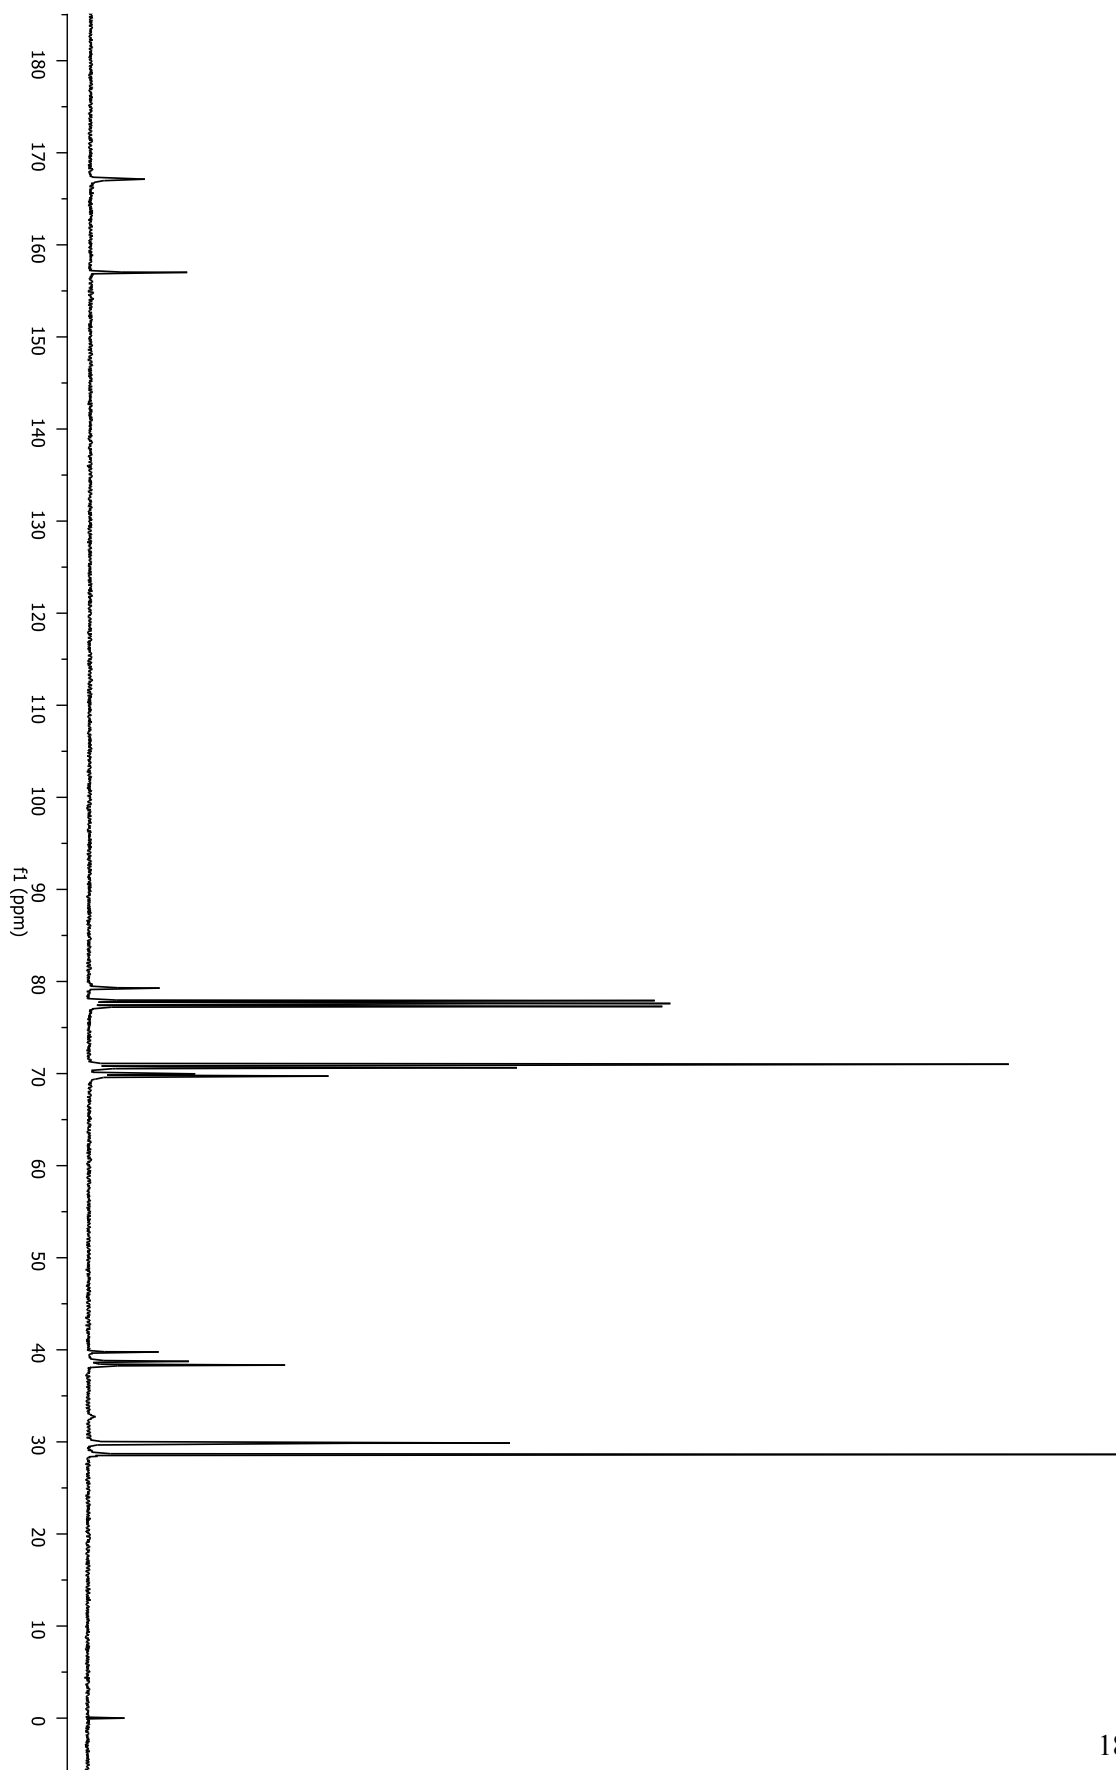

Figure S12. Mass Spectrum of 4.

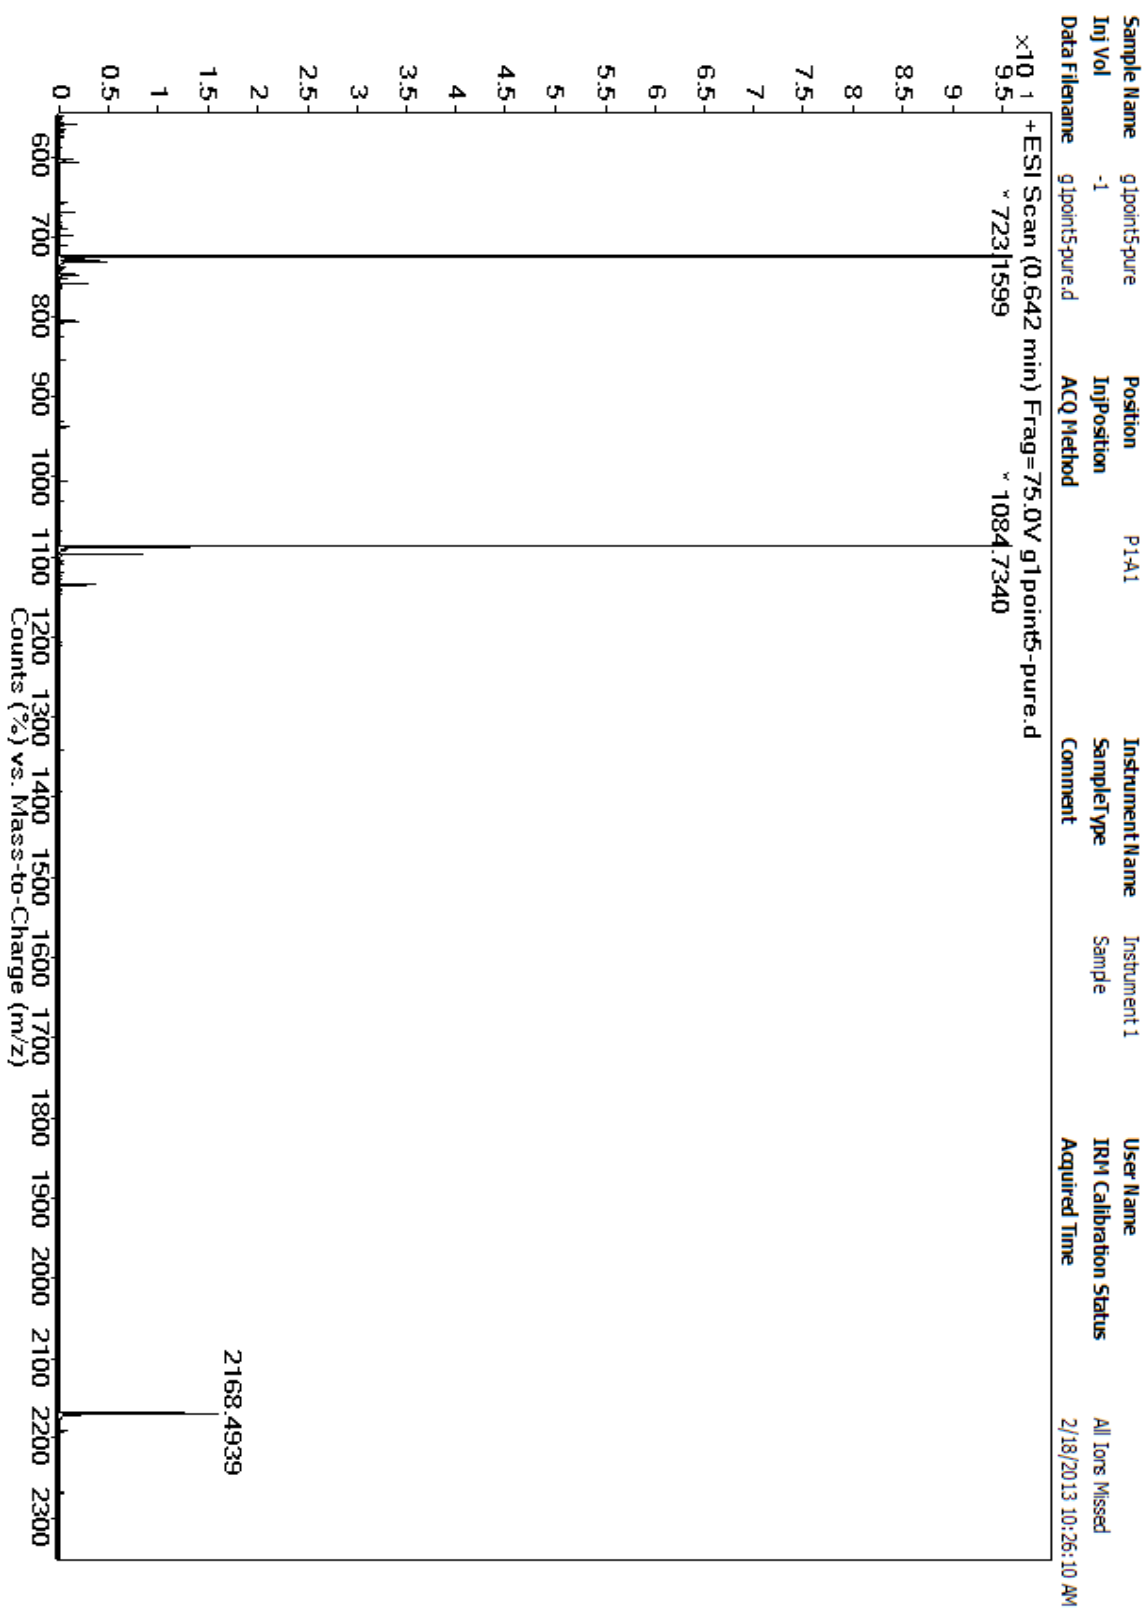

**Compound 5 (G2-C 1)** Compound 4 (2.95 g, 1.36 mmol) was added to a solution of cyanuric chloride (0.114 g, 0.62 mmol) in THF (6 mL). Afterwards DIPEA (0.46 mL, 2.6 mmol) was added dropwise. The solution was stirred for 2 minutes in order to allow reagents to mix. Then, the solution was irradiated in the microwave while stirring for 10 minutes at 60°C using dynamic mode. The crude product was purified automated chromatography. The solvent system (in column volumes) used was the following: 1 CV (100% DCM to 95:5= DCM: MeOH ), 15CV (95:5= DCM: MeOH), 10CV (90:10= DCM: MeOH), 5CV (85:15= DCM: MeOH), 5CV (80:20= DCM: MeOH) to give **5** (2.5g, 91%) as a clear oil. <sup>1</sup>H NMR (300 MHz, CDCl<sub>3</sub>) δ 3.65-3.44 (m, 208H, CH<sub>2</sub>OCH<sub>2</sub>CH<sub>2</sub>OCH<sub>2</sub>CH<sub>2</sub>OCH<sub>2</sub>, C<sub>3</sub>N<sub>3</sub>-NHCH<sub>2</sub>CH<sub>2</sub>CH<sub>2</sub>O), 3.21 (br m, 16H, BocNHCH<sub>2</sub>), 1.83-1.74 (m, 56H, OCH<sub>2</sub>CH<sub>2</sub>CH<sub>2</sub>), 1.44 (s, 72H, C(CH<sub>3</sub>)<sub>3</sub>); <sup>13</sup>C NMR (75 MHz, CDCl<sub>3</sub>) δ 166.6 (C<sub>3</sub>N<sub>3</sub>), 157.02 (CO), 79.29 (C(CH<sub>3</sub>)<sub>3</sub>), 70.97 (OCH<sub>2</sub>CH<sub>2</sub>O), 70.64 (two lines, OCH<sub>2</sub>CH<sub>2</sub>O), 69.94 (CH<sub>2</sub>CH<sub>2</sub>CH<sub>2</sub>O), 69.64 (CH<sub>2</sub>CH<sub>2</sub>CH<sub>2</sub>O), 38.73 (CH<sub>2</sub>CH<sub>2</sub>CH<sub>2</sub>O), 38.38(CH<sub>2</sub>CH<sub>2</sub>CH<sub>2</sub>O), 29.73 (NHCH<sub>2</sub>CH<sub>2</sub>CH<sub>2</sub>O), 28.6 (C(CH<sub>3</sub>)<sub>3</sub>); MS (ESI-TOF) calcd for C<sub>201</sub>H<sub>380</sub>ClN<sub>49</sub>O<sub>58</sub> 4443.7980, found 4447.6713 (M + H)<sup>+</sup>.

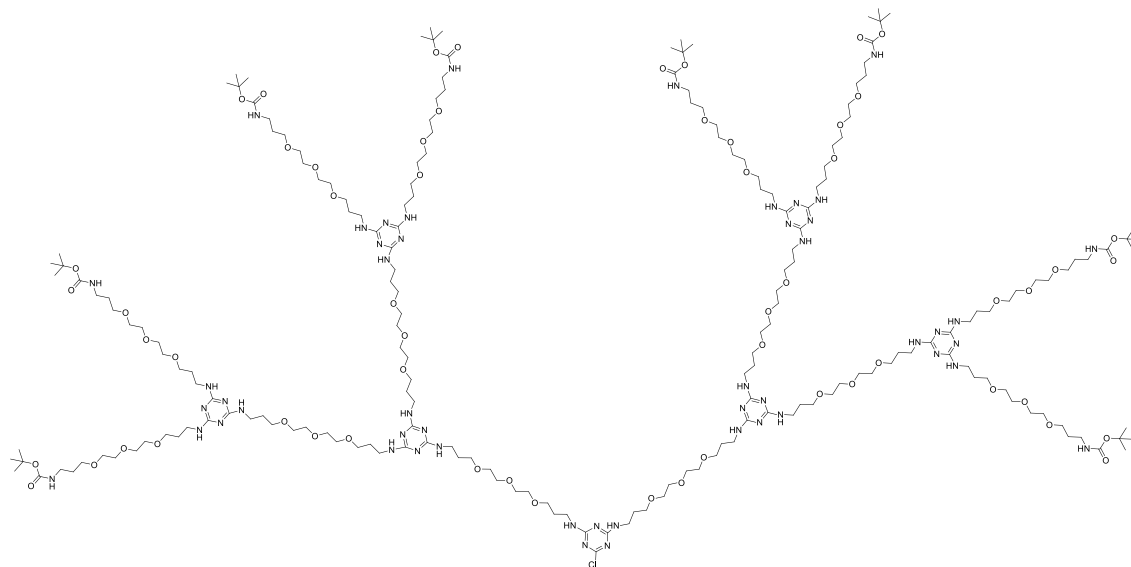

Figure S13.  $^1\text{H}$  NMR Spectrum of **5**.

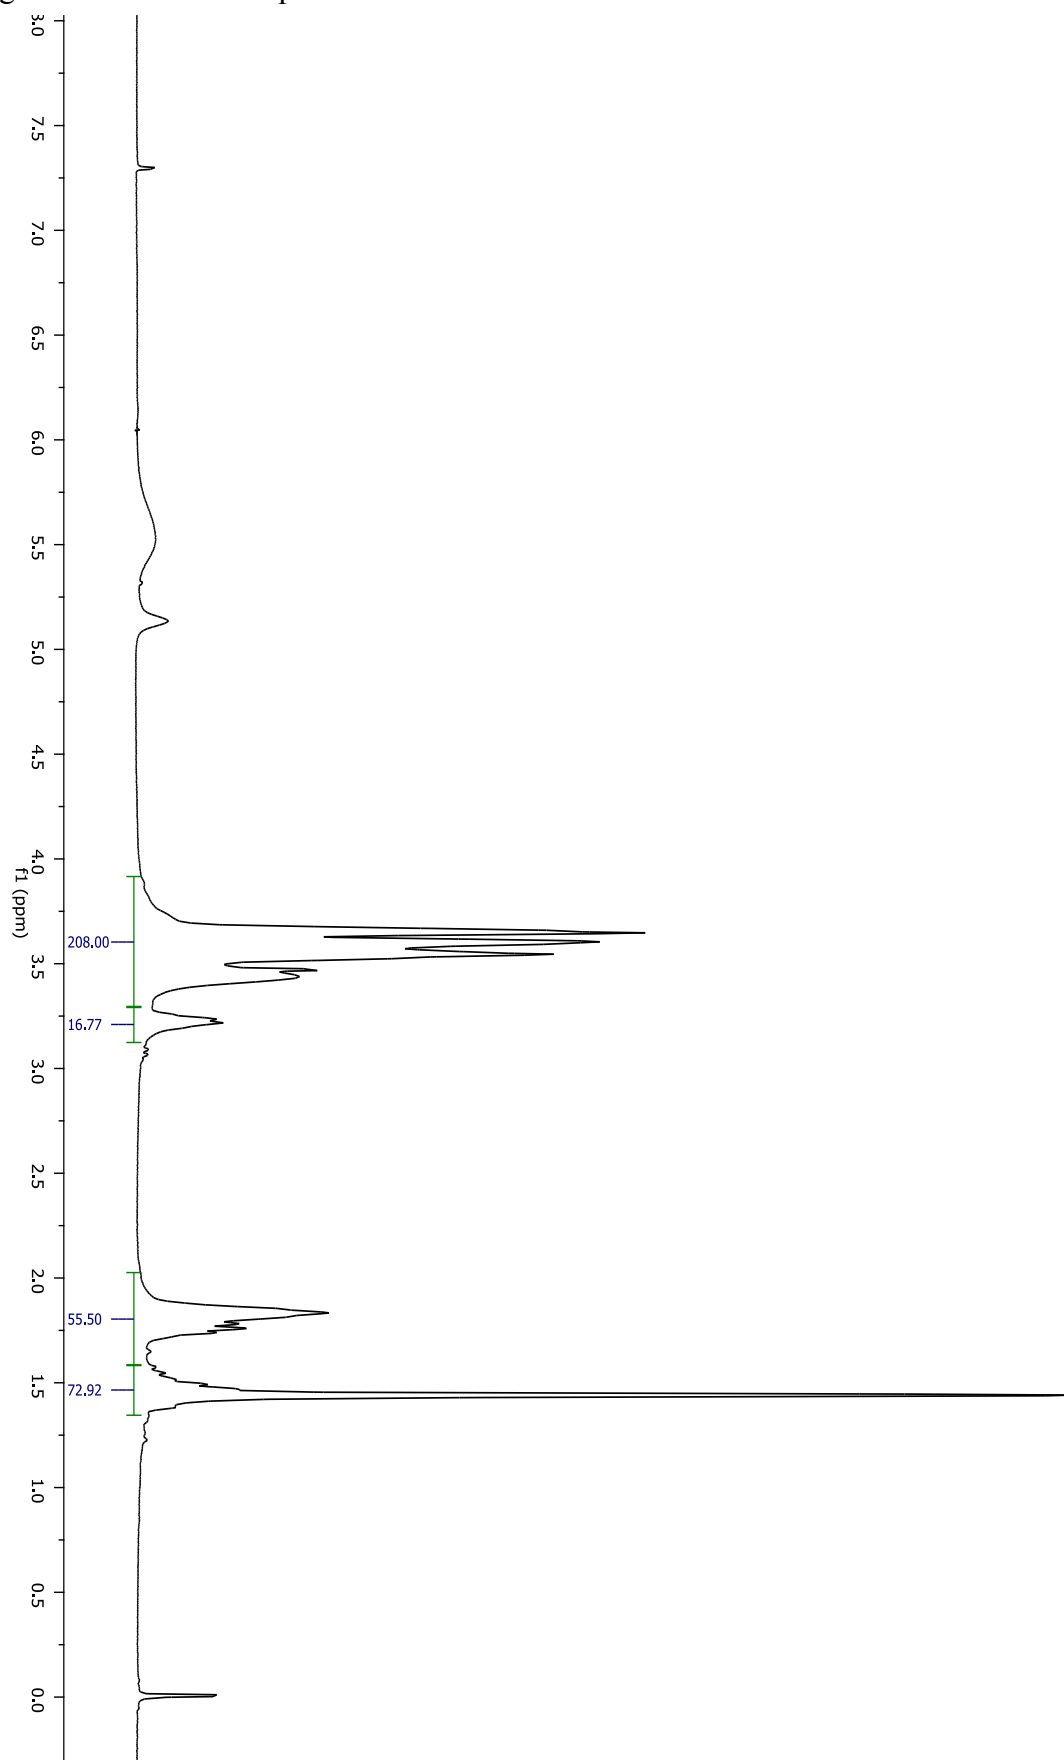

Figure S14.  $^{13}\text{C}$  NMR Spectrum of **5**

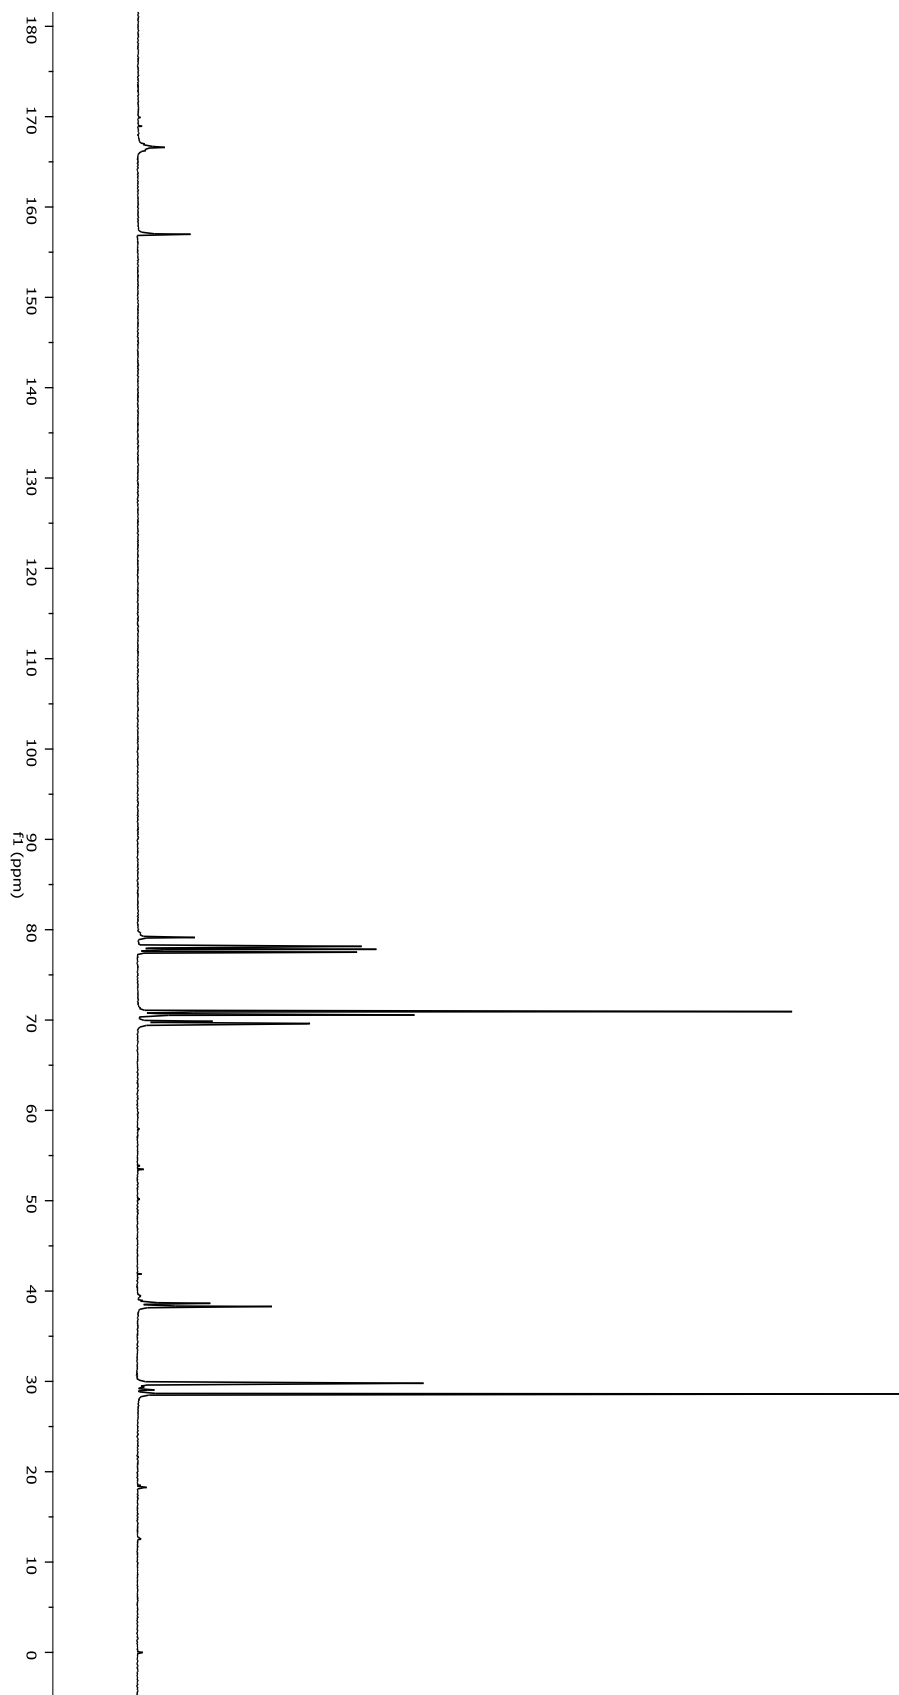

Figure S15. Mass Spectrum of 5.

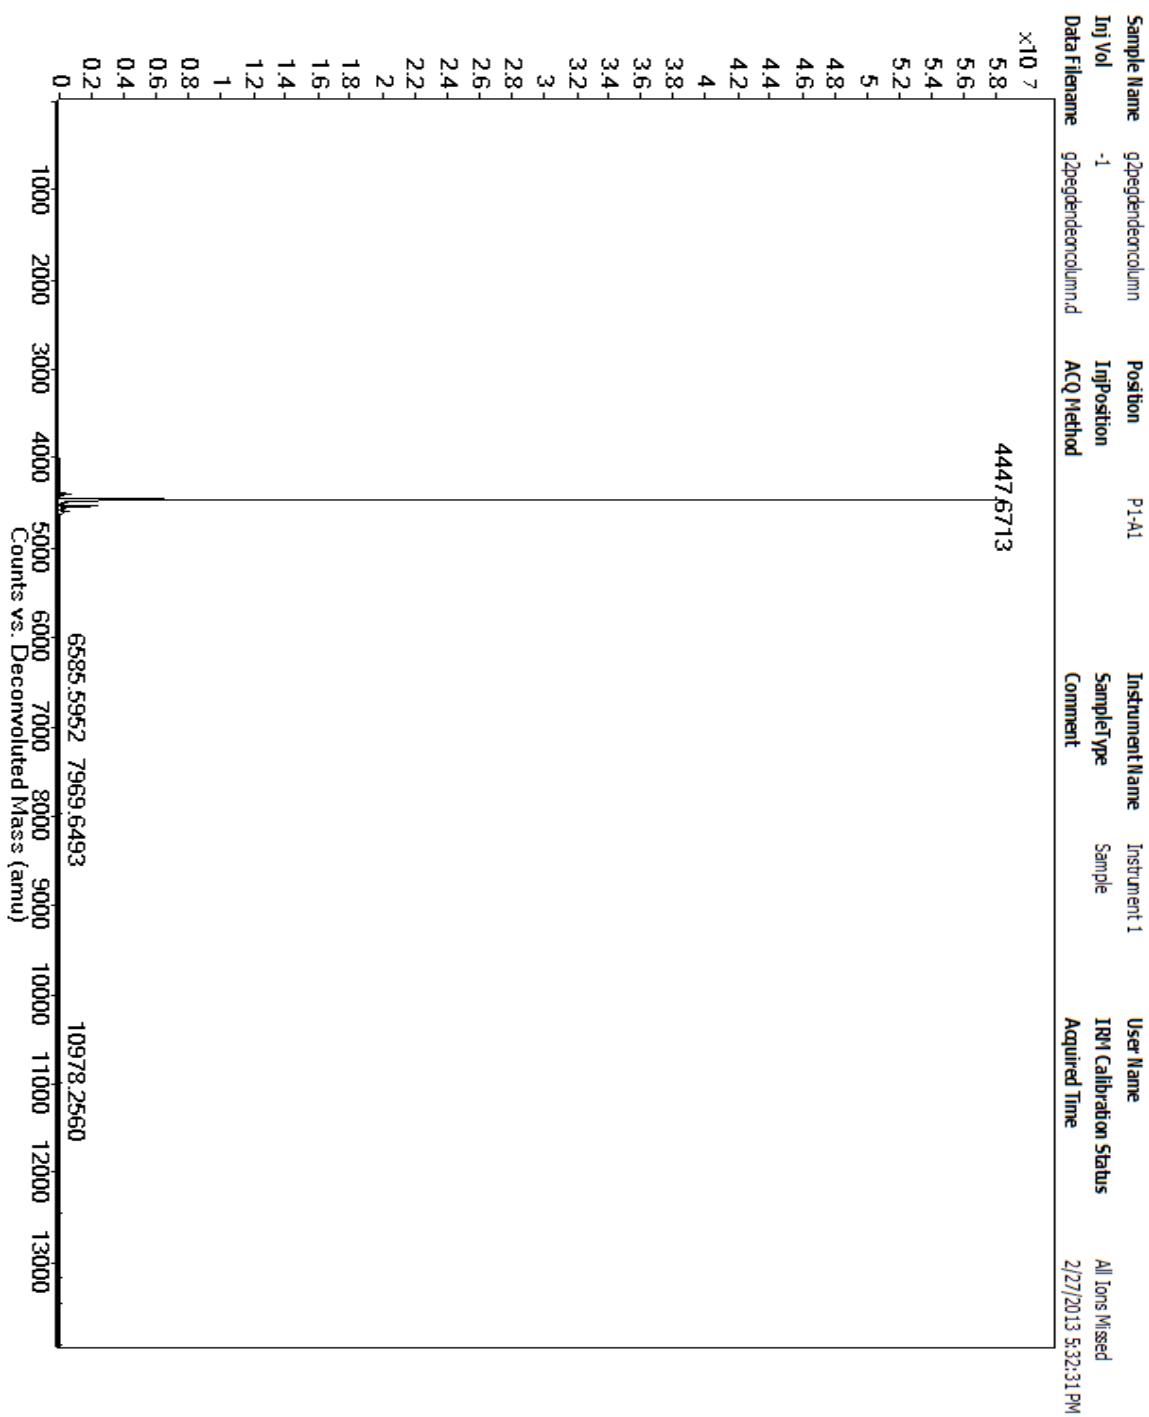

**Compound 6 (G2.5)** A solution of **5** (1.59 g, 0.36 mmol) with 4,7,10-trioxa-1,13-tridecanediamine (0.79g, 3.6 mmol) and Cs<sub>2</sub>CO<sub>3</sub> (0.23g, 0.72 mmol) in 3.6 mL of 1,4 dioxane was stirred for 2 minutes. Then, the solution was irradiated in the microwave while stirring for 30 minutes at 95°C using dynamic mode and then evaporated under vacuum. The residue was dissolved in dichloromethane, washed with brine solution and dried over MgSO<sub>4</sub>, filtered, and evaporated under vacuum. The crude was purified twice by automated chromatography. The solvent system (in column volumes) used was the following: 1CV (100% DCM to 95:5=DCM:MeOH), 14CV (95:5=DCM:MeOH), 10CV (90:10= DCM: MeOH), 10CV (85:15= DCM: MeOH), 5CV (80:20= DCM: MeOH), 10CV (5:1:1% = DCM: MeOH: NH<sub>4</sub>OH) to give **6** (1.35g, 82%) as a clear oil. <sup>1</sup>H NMR (300 MHz, CDCl<sub>3</sub>) δ 3.65-3.46 (m, 222H, CH<sub>2</sub>OCH<sub>2</sub>CH<sub>2</sub>OCH<sub>2</sub>CH<sub>2</sub>OCH<sub>2</sub>, C<sub>3</sub>N<sub>3</sub>-NHCH<sub>2</sub>CH<sub>2</sub>CH<sub>2</sub>O), 3.21 (br m, 16H, BocNHCH<sub>2</sub>), 2.0 (m, 2H, NH<sub>2</sub>CH<sub>2</sub>CH<sub>2</sub>CH<sub>2</sub>O) 1.84-1.73 (m, 60H, OCH<sub>2</sub>CH<sub>2</sub>CH<sub>2</sub>), 1.43 (s, 72H, C(CH<sub>3</sub>)<sub>3</sub>); <sup>13</sup>C NMR (75 MHz, CDCl<sub>3</sub>) δ 167.11 (C<sub>3</sub>N<sub>3</sub>), 157.0 (CO), 79.32 (C(CH<sub>3</sub>)<sub>3</sub>), 70.96 (OCH<sub>2</sub>CH<sub>2</sub>O), 70.66 (two lines, OCH<sub>2</sub>CH<sub>2</sub>O), 69.94 (CH<sub>2</sub>CH<sub>2</sub>CH<sub>2</sub>O), 69.51 (CH<sub>2</sub>CH<sub>2</sub>CH<sub>2</sub>O), 38.73 (NH<sub>2</sub>CH<sub>2</sub>CH<sub>2</sub>CH<sub>2</sub>O), 38.73 (CH<sub>2</sub>CH<sub>2</sub>CH<sub>2</sub>O), 38.56 (CH<sub>2</sub>CH<sub>2</sub>CH<sub>2</sub>O), not found (NH<sub>2</sub>CH<sub>2</sub>CH<sub>2</sub>CH<sub>2</sub>O), not found (NHCH<sub>2</sub>CH<sub>2</sub>CH<sub>2</sub>O), 28.63 (C(CH<sub>3</sub>)<sub>3</sub>); MS (ESI-TOF) calcd for C<sub>211</sub>H<sub>403</sub>N<sub>51</sub>O<sub>61</sub> 4628.0001, found 4632.2038(M + H)<sup>+</sup>.

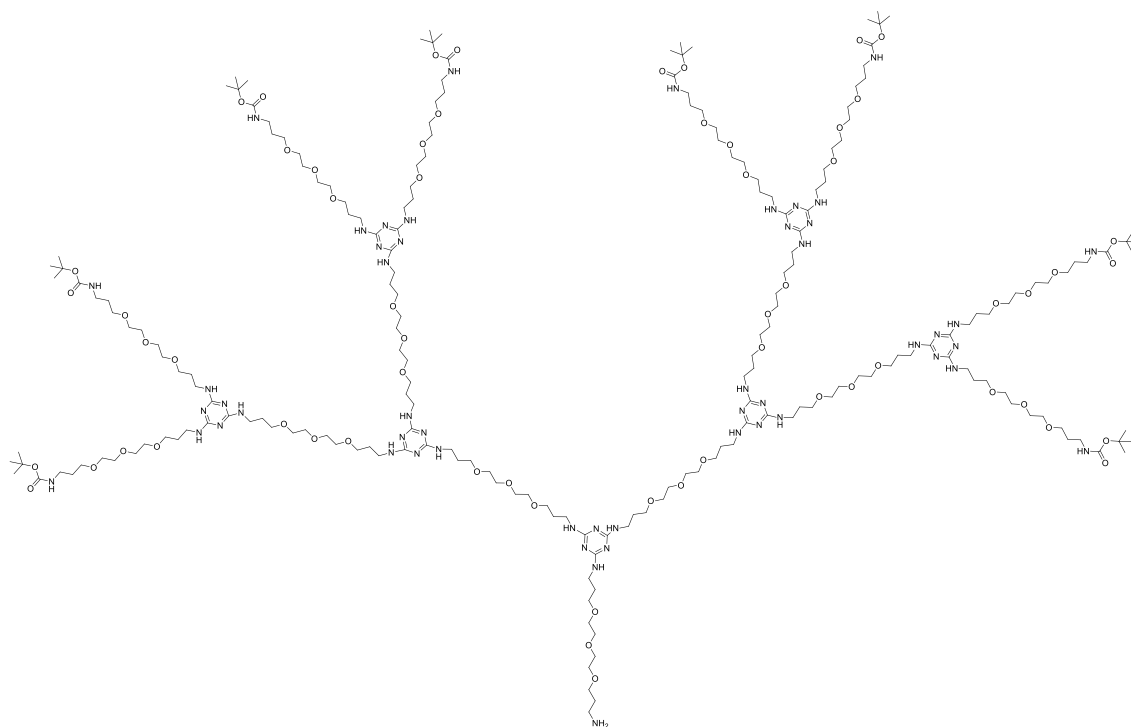



Figure S16.  $^1\text{H}$  NMR of **6**.

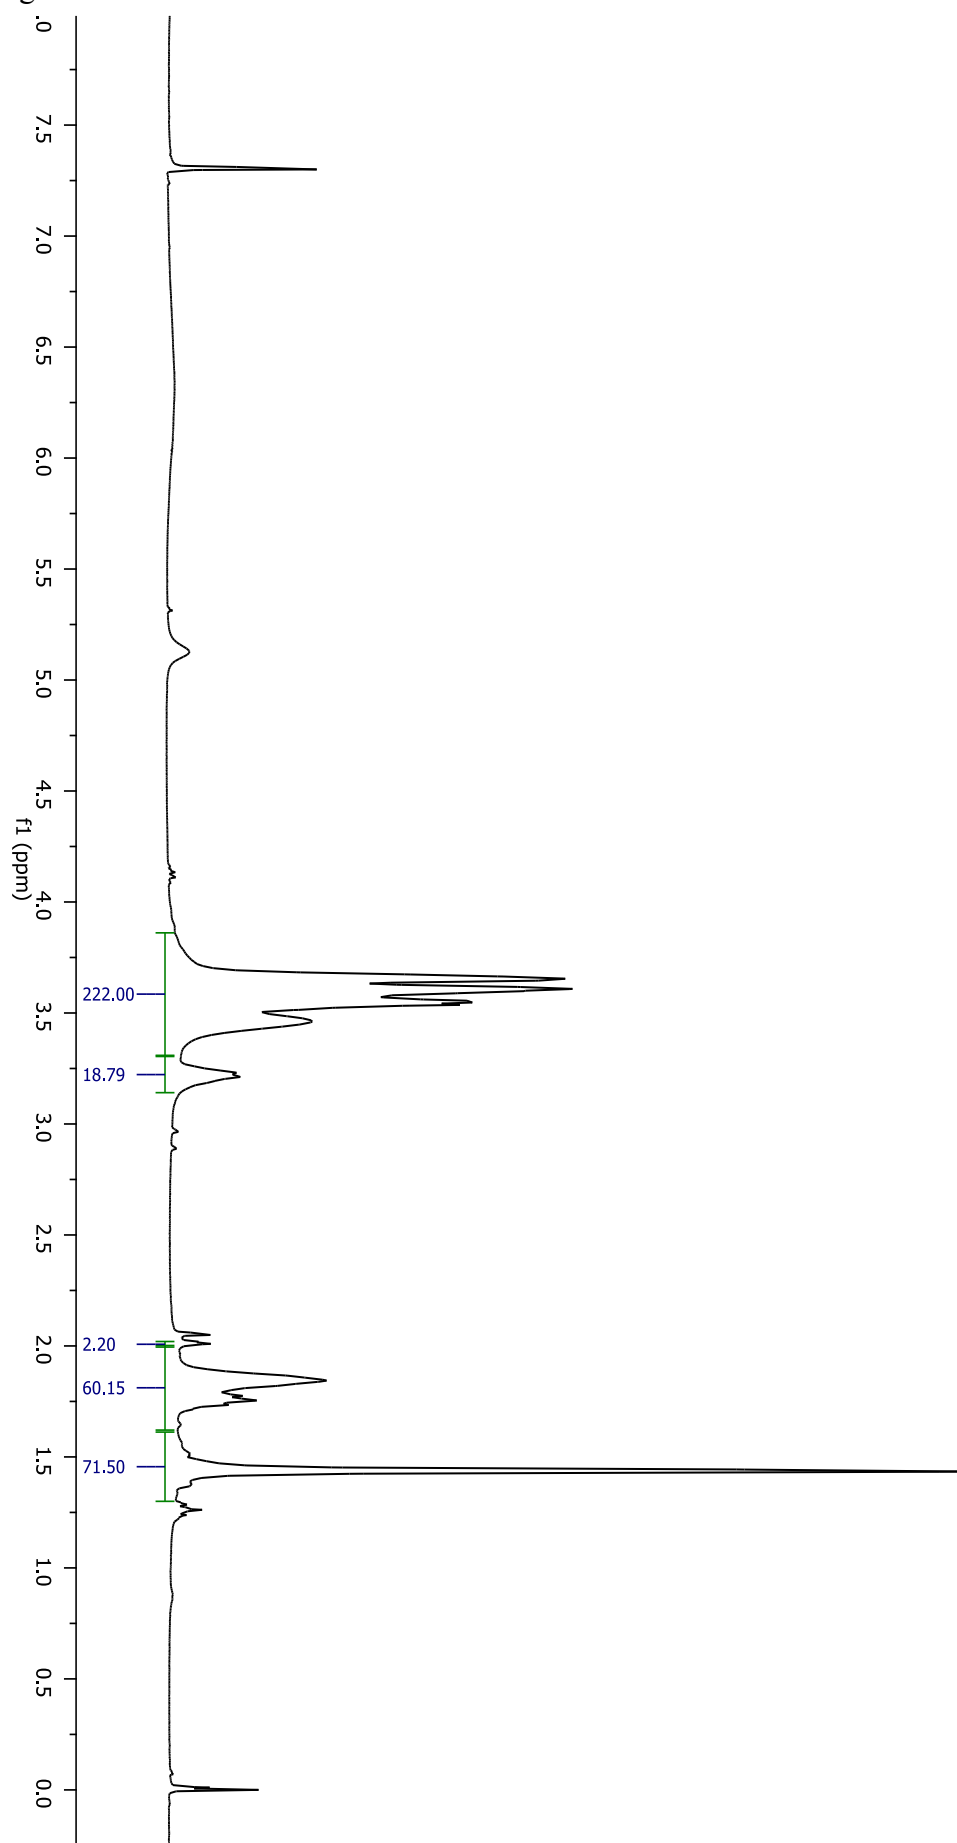

Figure S17.  $^{13}\text{C}$  NMR of **6**.

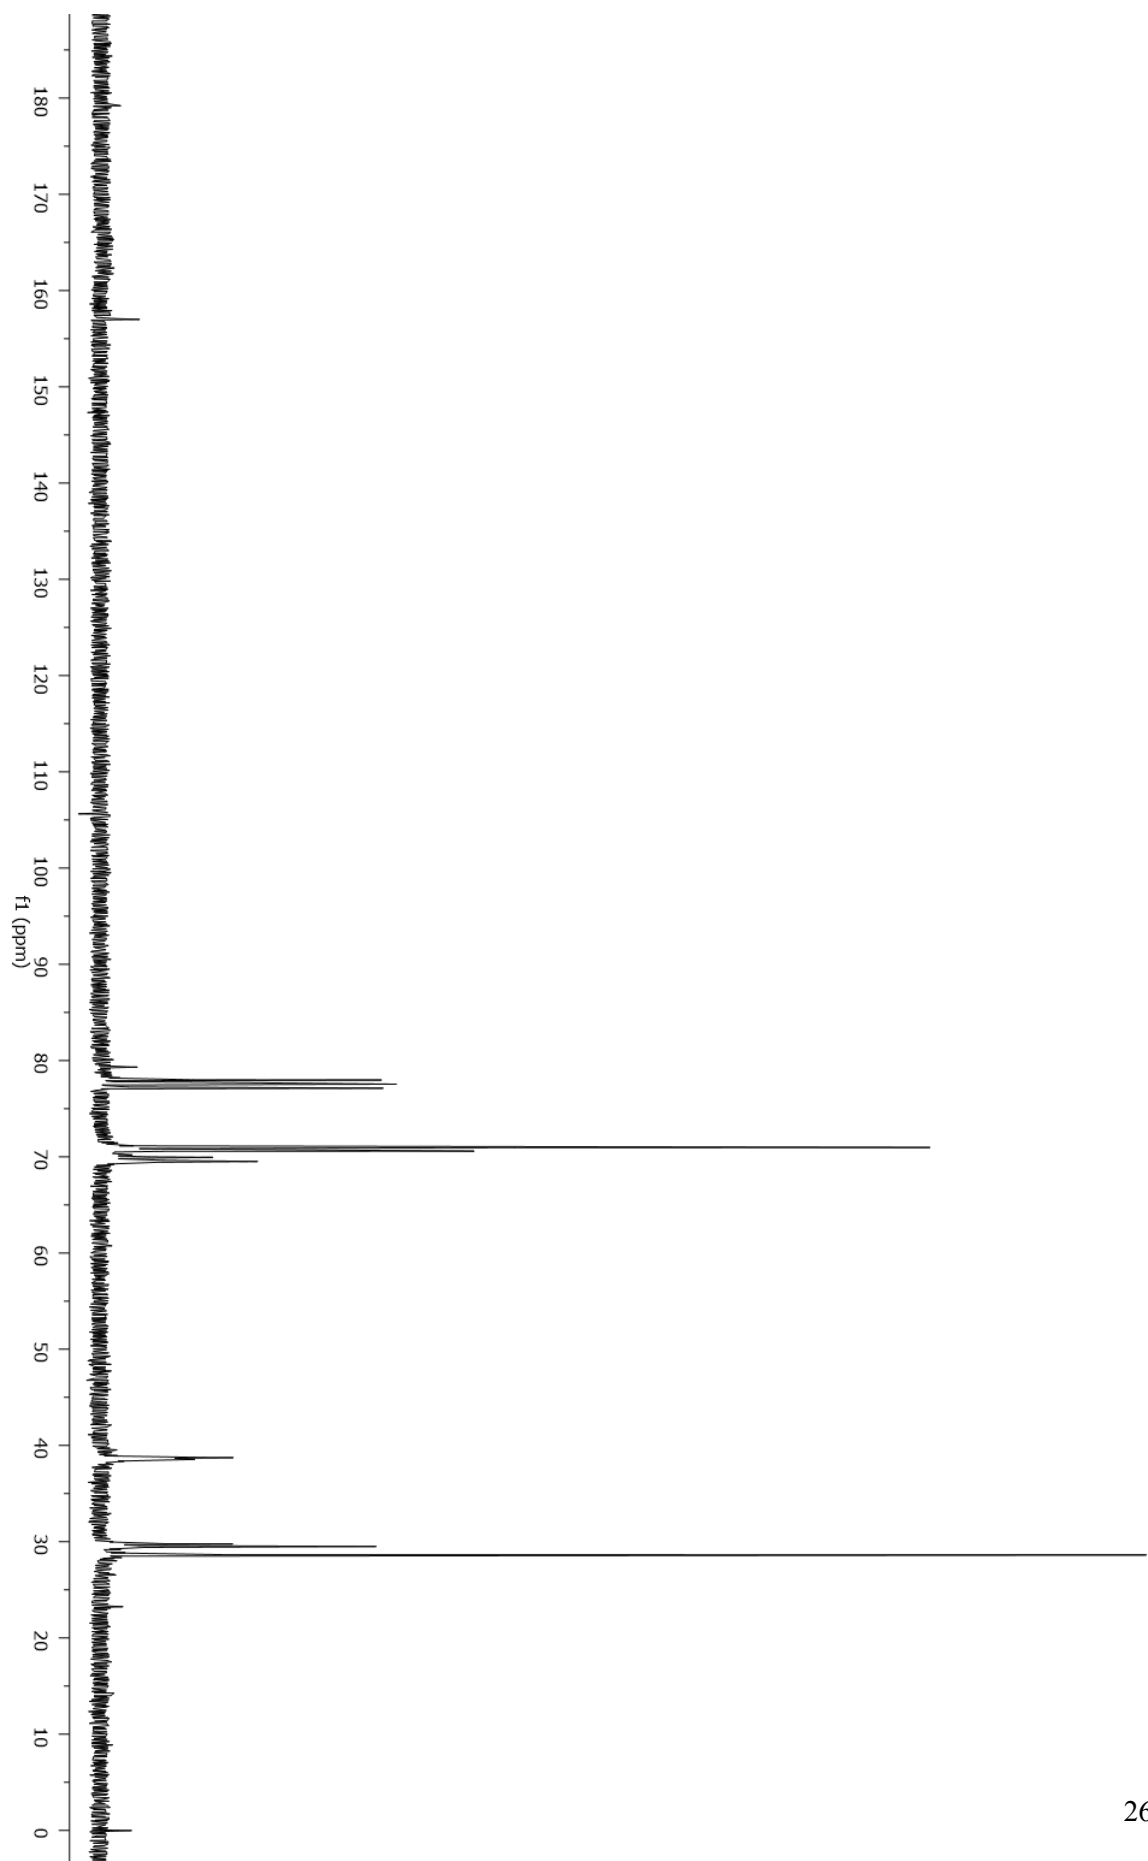

Figure S18. Mass Spectrum of 6.

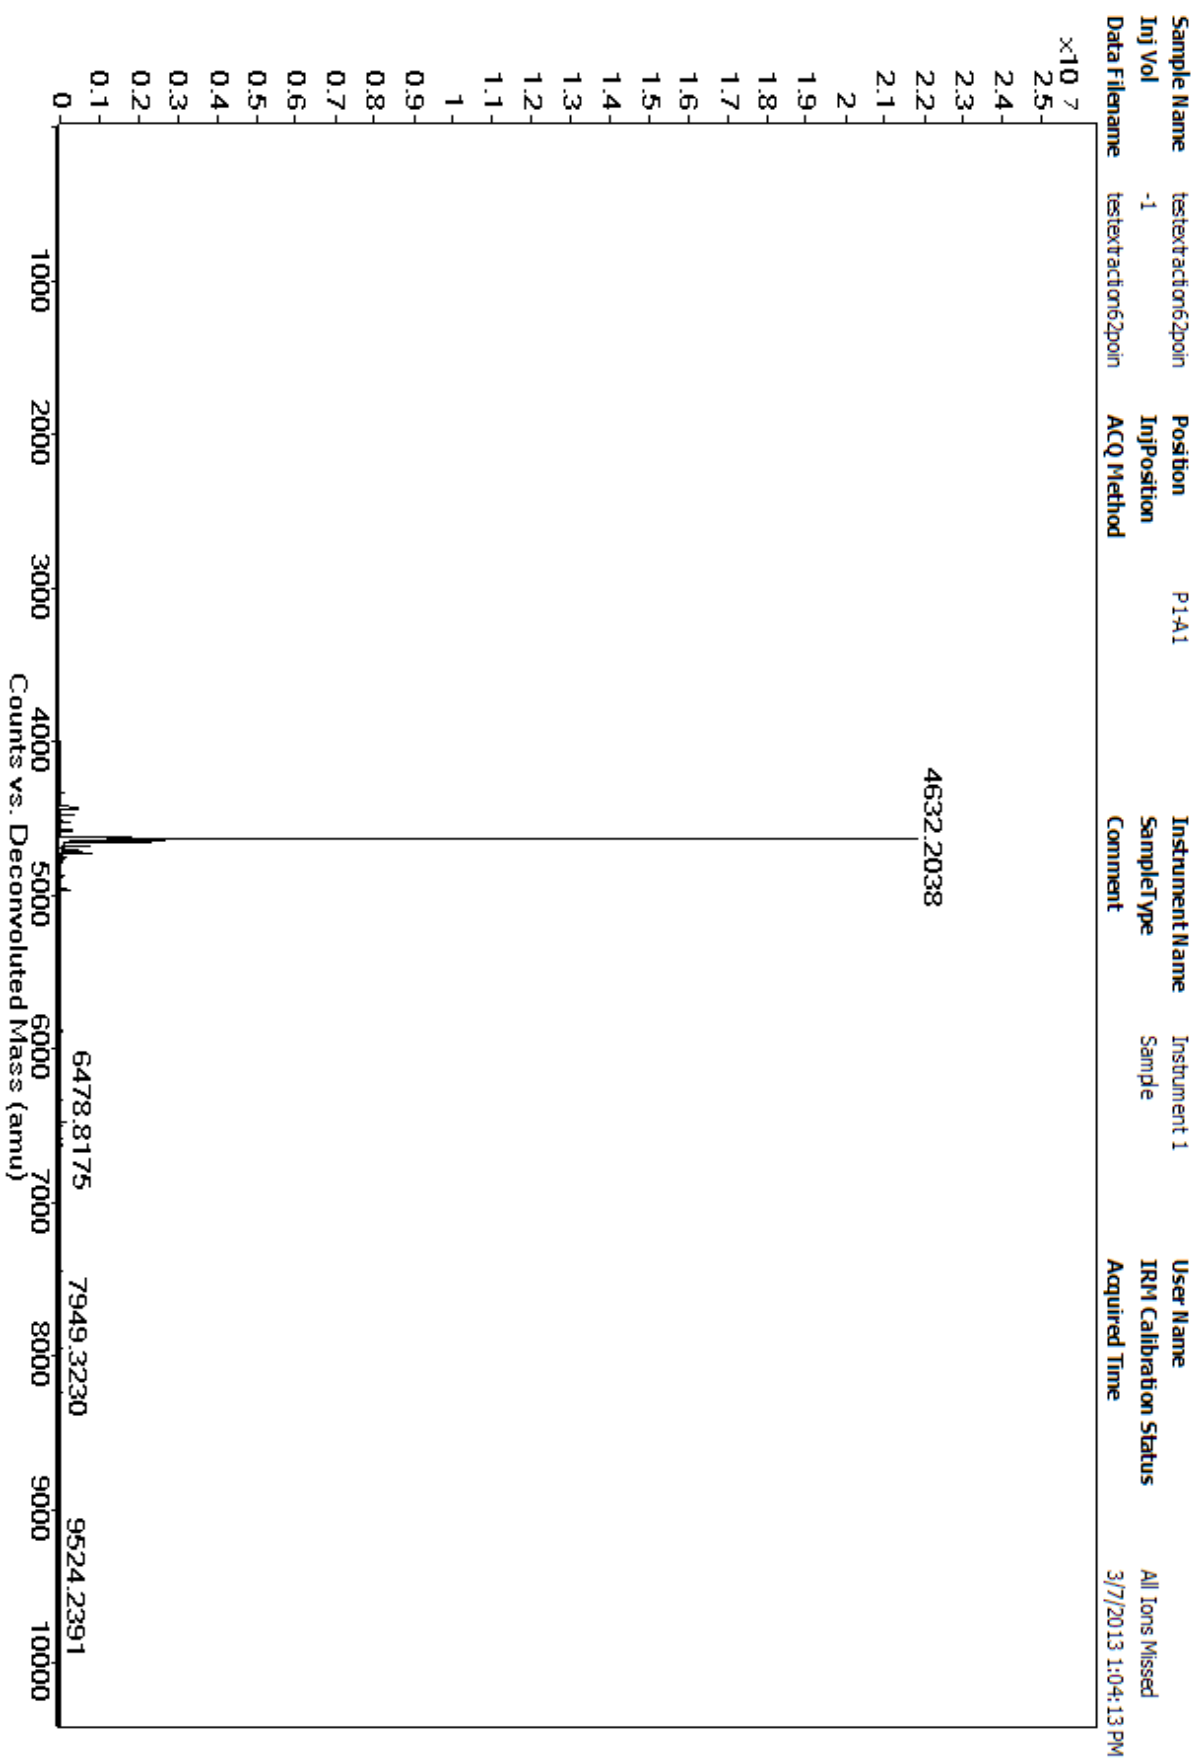

**Compound 7 (G3-Cl)** Compound **6** (1.05 g, 0.228 mmol) was added to a solution of cyanuric chloride (0.019 g, 0.104 mmol) in THF (2.3 mL), afterwards DIPEA was added dropwise (0.084 mL, 0.487 mmol). The solution was stirred for 2 minutes in order to allow reagents to mix. Then, the solution was irradiated in the microwave while stirring (CEM SP Discovery) for 10 minutes at 60°C using dynamic mode. The crude product was purified twice by automated chromatography. The solvent system (in column volumes) used was the following: 1 CV (100% DCM to 95:5= DCM: MeOH ), 14CV (95:5= DCM: MeOH), 10CV (90:10= DCM: MeOH), 10CV (85:15= DCM: MeOH), 15CV (80:20= DCM: MeOH) to give **7** (1.49g, 70%) as a clear oil. <sup>1</sup>H NMR (300 MHz, CDCl<sub>3</sub>) δ 3.64-3.42 (m, 448H, CH<sub>2</sub>OCH<sub>2</sub>CH<sub>2</sub>OCH<sub>2</sub>CH<sub>2</sub>OCH<sub>2</sub>, C<sub>3</sub>N<sub>3</sub>-NHCH<sub>2</sub>CH<sub>2</sub>CH<sub>2</sub>O), 3.21 (br m, 32H, BocNHCH<sub>2</sub>), 1.83-1.74 (m, 120H, OCH<sub>2</sub>CH<sub>2</sub>CH<sub>2</sub>), 1.44 (s, 144H, C(CH<sub>3</sub>)<sub>3</sub>); <sup>13</sup>C NMR (75 MHz, CDCl<sub>3</sub>) δ 167.04 (C<sub>3</sub>N<sub>3</sub>), 154.36 (CO), 80.05(C(CH<sub>3</sub>)<sub>3</sub>), 70.98 (OCH<sub>2</sub>CH<sub>2</sub>O), 70.61 (two lines, OCH<sub>2</sub>CH<sub>2</sub>O), 69.94 (CH<sub>2</sub>CH<sub>2</sub>CH<sub>2</sub>O), 69.64 (CH<sub>2</sub>CH<sub>2</sub>CH<sub>2</sub>O), 38.73 (CH<sub>2</sub>CH<sub>2</sub>CH<sub>2</sub>O), 38.30(CH<sub>2</sub>CH<sub>2</sub>CH<sub>2</sub>O), 29.84 (NHCH<sub>2</sub>CH<sub>2</sub>CH<sub>2</sub>O), 28.62 (C(CH<sub>3</sub>)<sub>3</sub>); MS (ESI-TOF) calcd for C<sub>425</sub>H<sub>804</sub>ClN<sub>105</sub>O<sub>122</sub> 9366.9625, found 9374.7207(M + H)<sup>+</sup>.

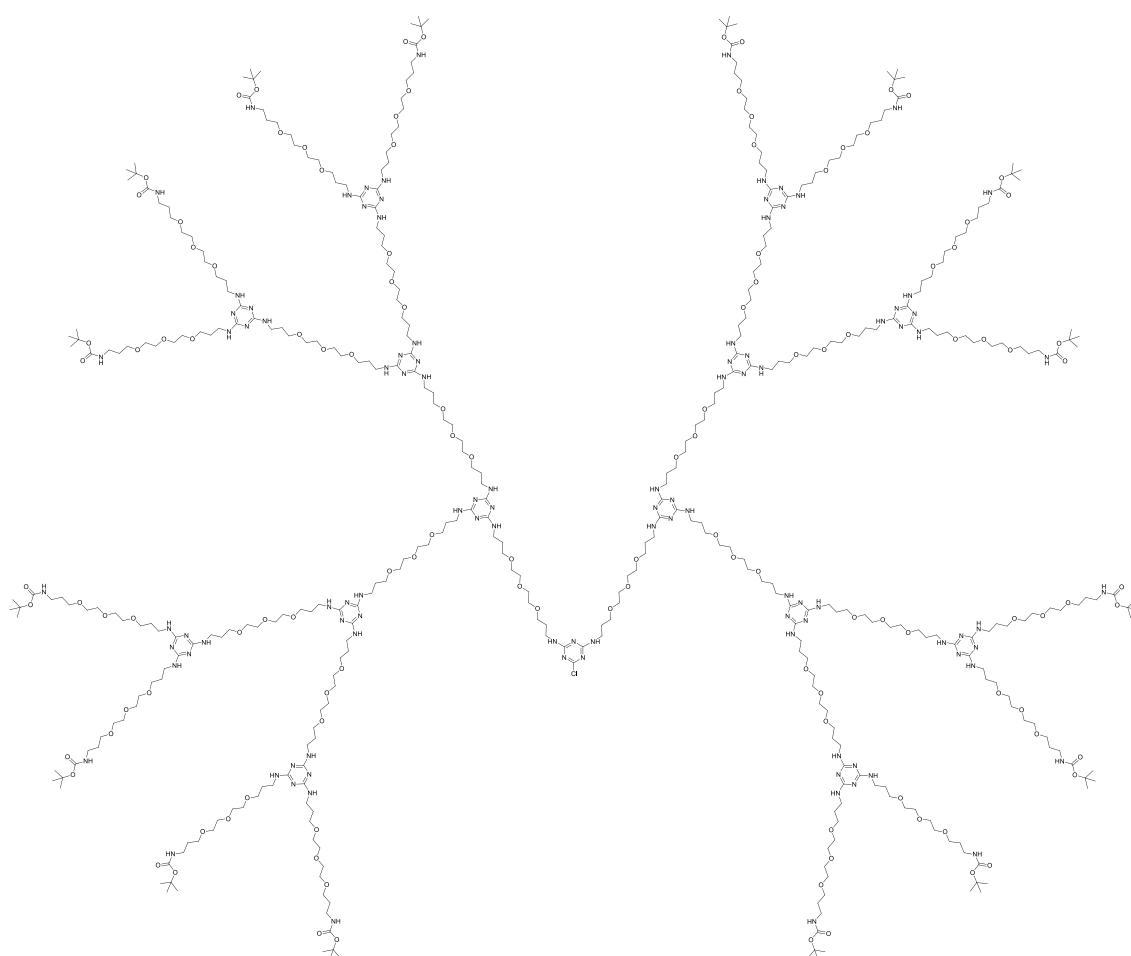

Figure S19.  $^1\text{H}$  NMR of **7**.

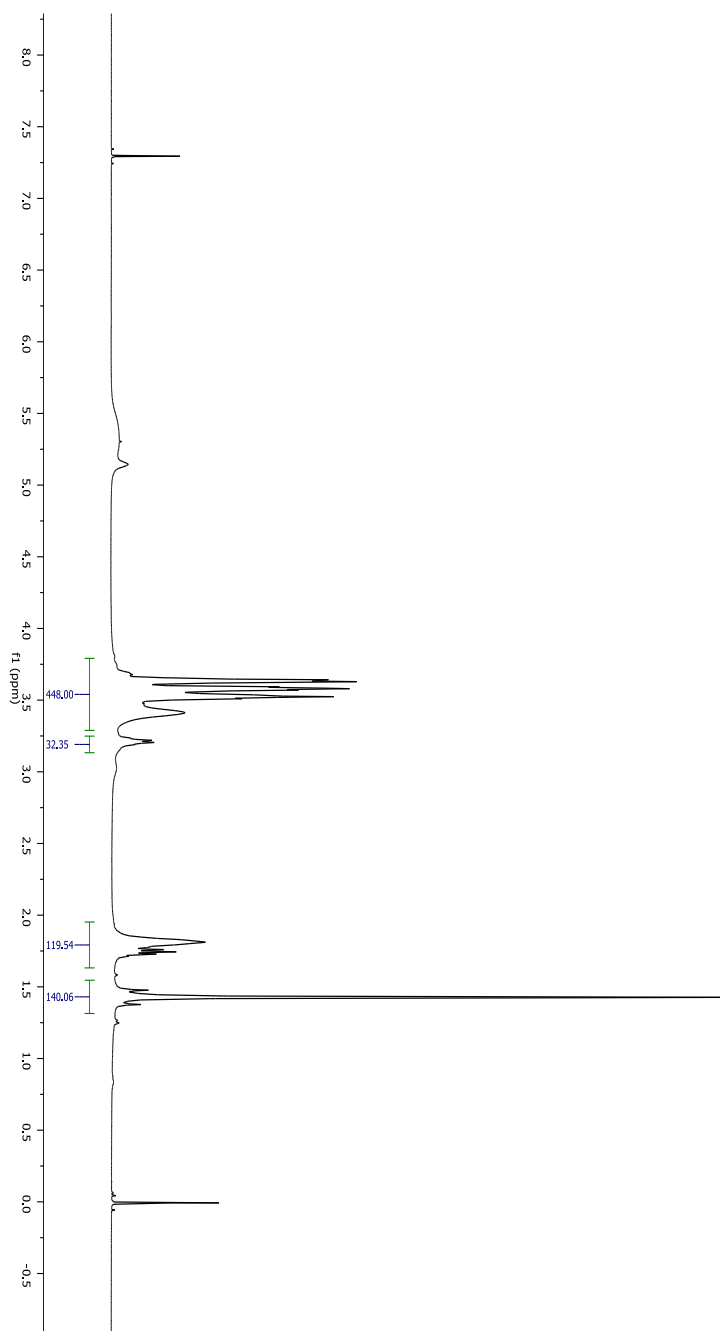

Figure S20.  $^{13}\text{C}$  NMR Spectrum of 7.

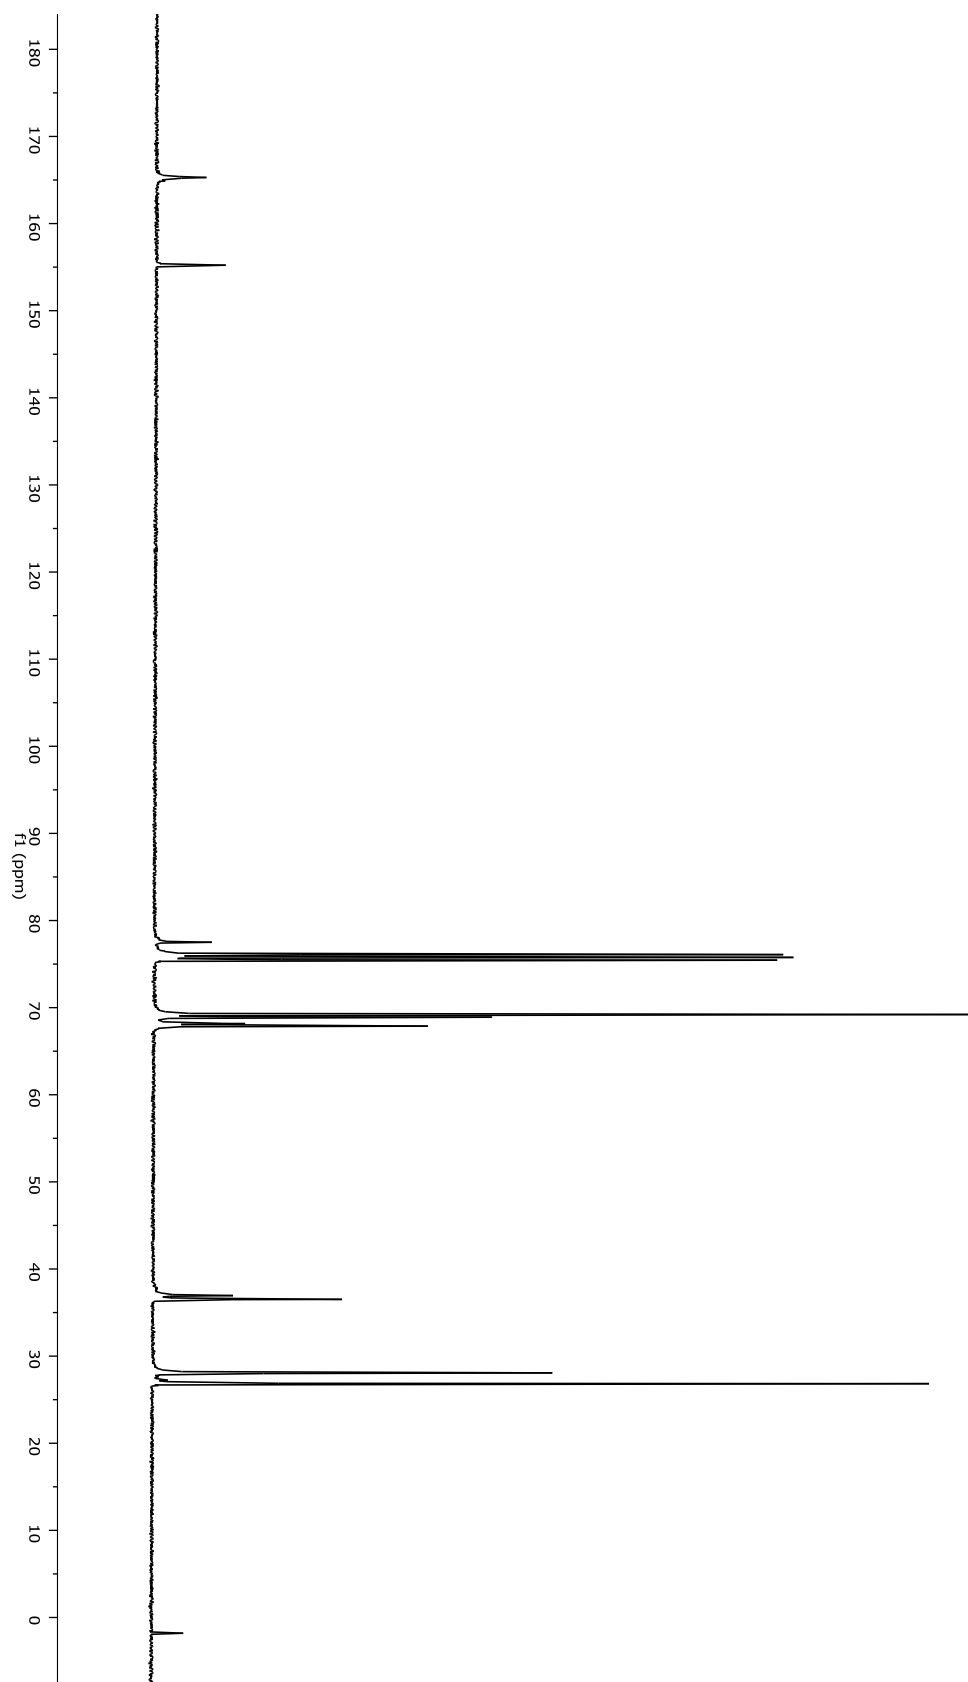

Figure S21. Mass spectrum of 7.

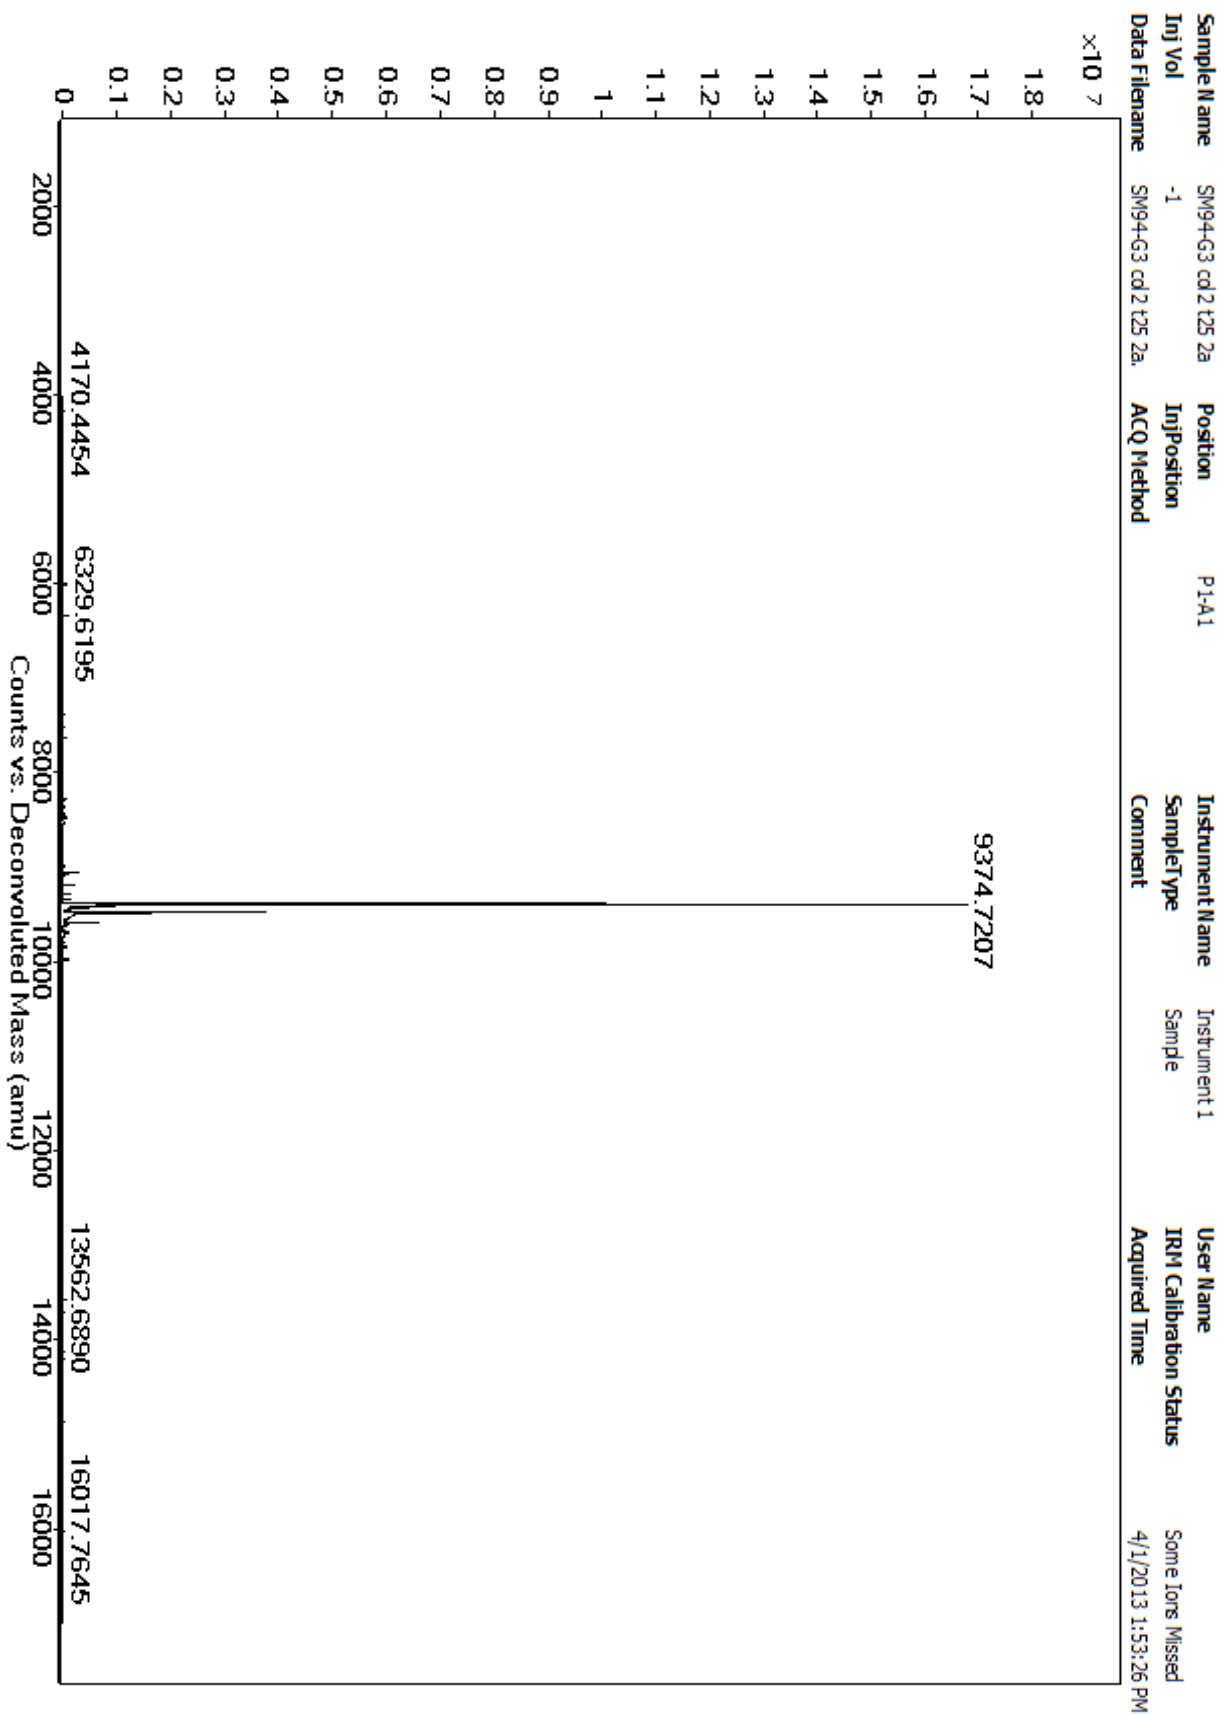

**Compound 8 (G1-alkyne).** A solution of propargylamine (0.136 g, 2.48 mmol), **1** (0.492 g, 0.248 mmol), and Cs<sub>2</sub>CO<sub>3</sub> (0.242 g, 0.741 mmol) in dioxane (2.5 mL) was stirred for 2 minutes. Then, the solution was irradiated in the microwave while stirring for three periods of 30 minutes at 95°C using dynamic mode. In each extra period were added 10 equivalents more of propargylamine (0.408g, 7.44 mmol) to give a total of 30 equivalents in the final solution. Afterwards, the reaction mixtures was evaporated under vacuum. The residue was dissolved in dichloromethane, washed with brine solution and dried over MgSO<sub>4</sub>, filtered, and evaporated under vacuum. The crude product was purified by silica gel chromatography (DCM:MeOH = 10:1) to give **8** (0.46 g, 93% ) as a clear oil. <sup>1</sup>H NMR (300 MHz, CDCl<sub>3</sub>) δ 4.16 (br, 2H, HC≡CCH<sub>2</sub>), 3.65-3.43 (m, 88H, CH<sub>2</sub>OCH<sub>2</sub>CH<sub>2</sub>OCH<sub>2</sub>CH<sub>2</sub>OCH<sub>2</sub>, C<sub>3</sub>N<sub>3</sub>-NHCH<sub>2</sub>CH<sub>2</sub>CH<sub>2</sub>O), 3.21 (br m, 8H, BocNHCH<sub>2</sub>), 2.23 (br, 1H, HC≡CCH<sub>2</sub>), 1.85-1.73 (m, 24H, OCH<sub>2</sub>CH<sub>2</sub>CH<sub>2</sub>), 1.43 (s, 36H, C(CH<sub>3</sub>)<sub>3</sub>); <sup>13</sup>C NMR (75 MHz, CDCl<sub>3</sub>) δ 166.59 (br, C<sub>3</sub>N<sub>3</sub>), 156.98 (CO), 81.85 (HC≡CCH<sub>2</sub>), 79.32 (C(CH<sub>3</sub>)<sub>3</sub>), 70.7 (HC≡CCH<sub>2</sub>), 70.96 (OCH<sub>2</sub>CH<sub>2</sub>O), 69.95 (OCH<sub>2</sub>CH<sub>2</sub>O), 69.93 (OCH<sub>2</sub>CH<sub>2</sub>O) 69.67 (CH<sub>2</sub>CH<sub>2</sub>CH<sub>2</sub>O), 69.56 (CH<sub>2</sub>CH<sub>2</sub>CH<sub>2</sub>O), 38.71 (CH<sub>2</sub>CH<sub>2</sub>CH<sub>2</sub>O), 38.35 (CH<sub>2</sub>CH<sub>2</sub>CH<sub>2</sub>O), not found (HC≡CCH<sub>2</sub>), 28.61 (NHCH<sub>2</sub>CH<sub>2</sub>CH<sub>2</sub>O), 28.4 (C(CH<sub>3</sub>)<sub>3</sub>); MS (ESI-TOF) calcd for C<sub>92</sub>H<sub>172</sub>N<sub>22</sub>O<sub>26</sub> 2001.2813, found 2002.2499 (M + H)<sup>+</sup>.

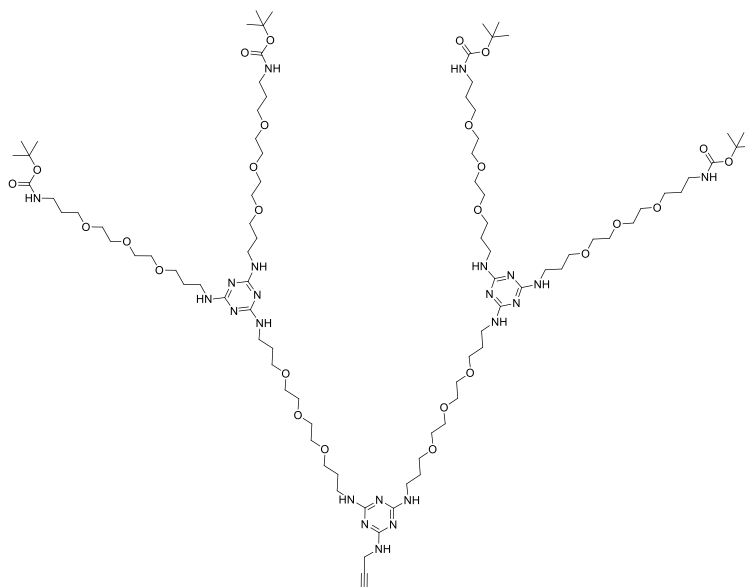



Figure S22.  $^1\text{H}$  NMR Spectrum of **8**.

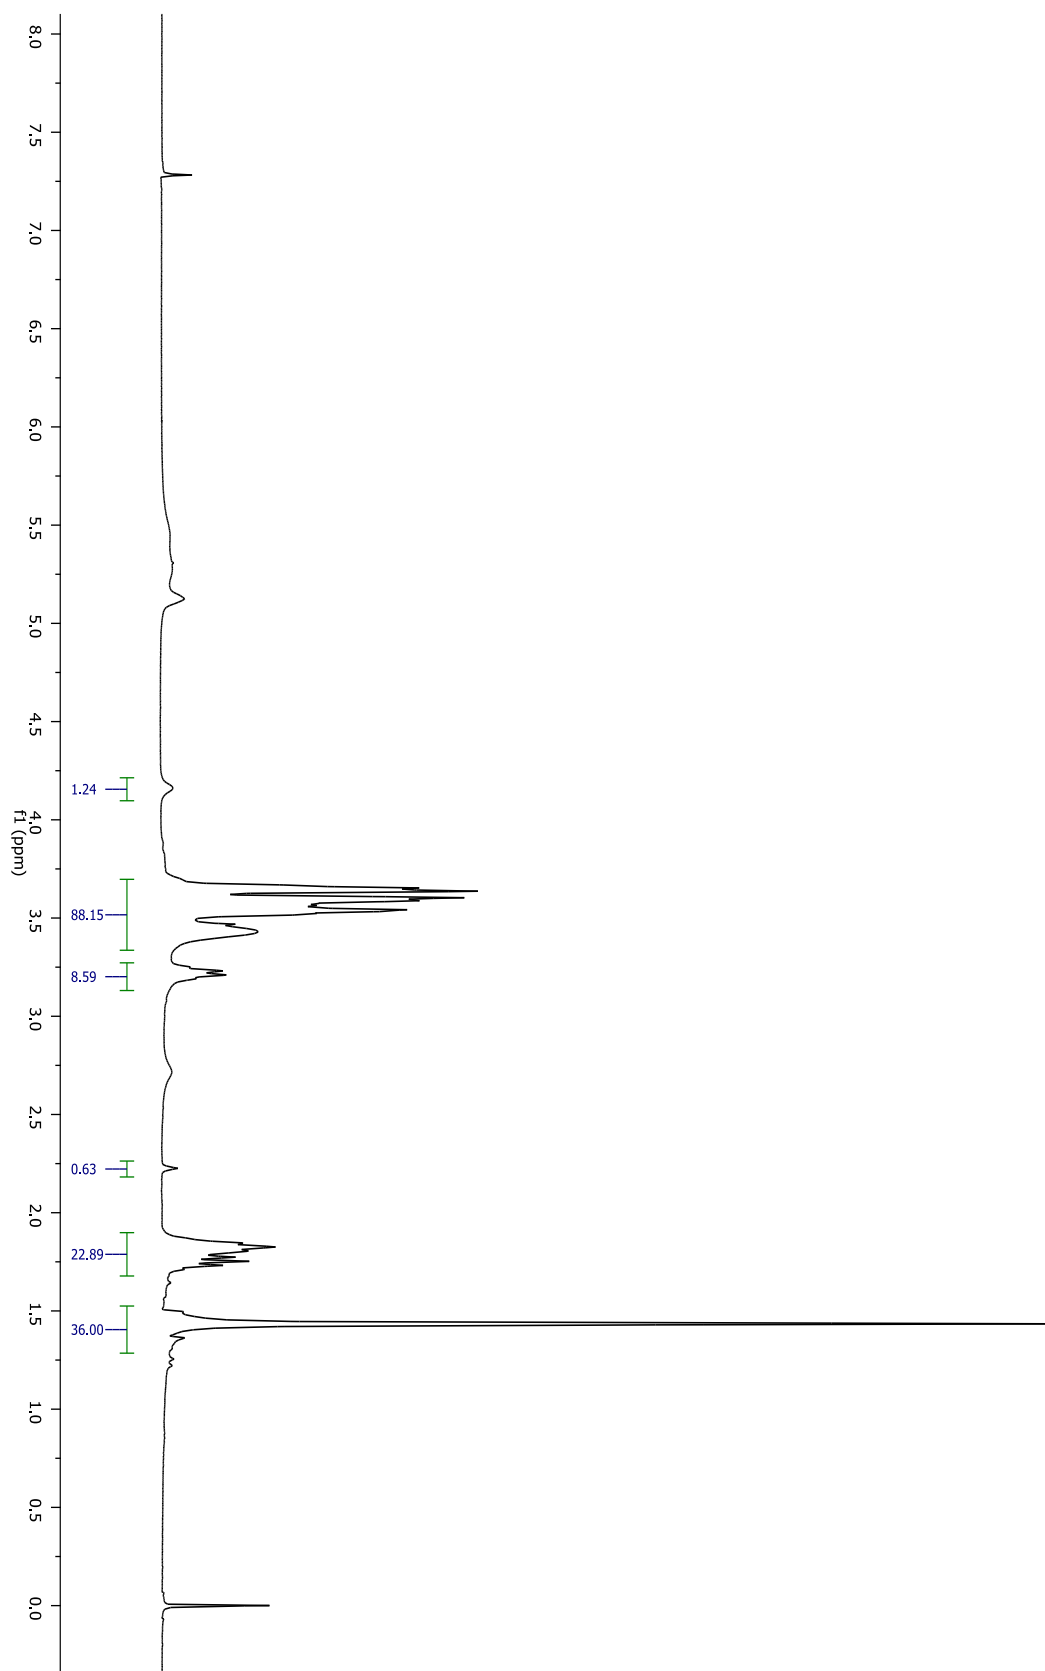

Figure S23.  $^{13}\text{C}$  NMR Spectrum of **8**.

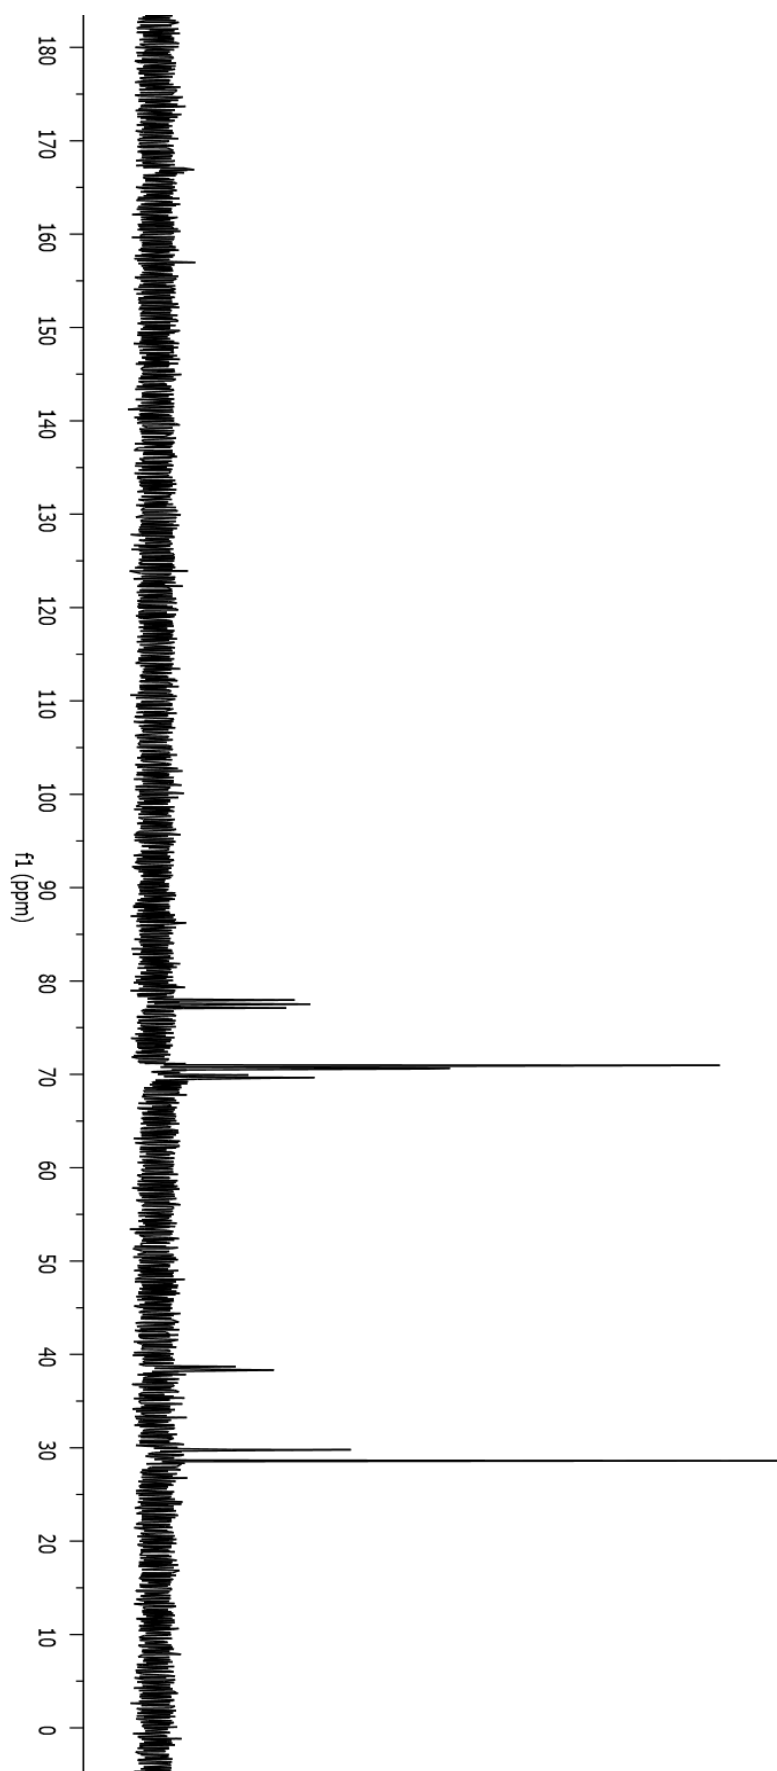

Figure S24. Mass Spectrum of 8.

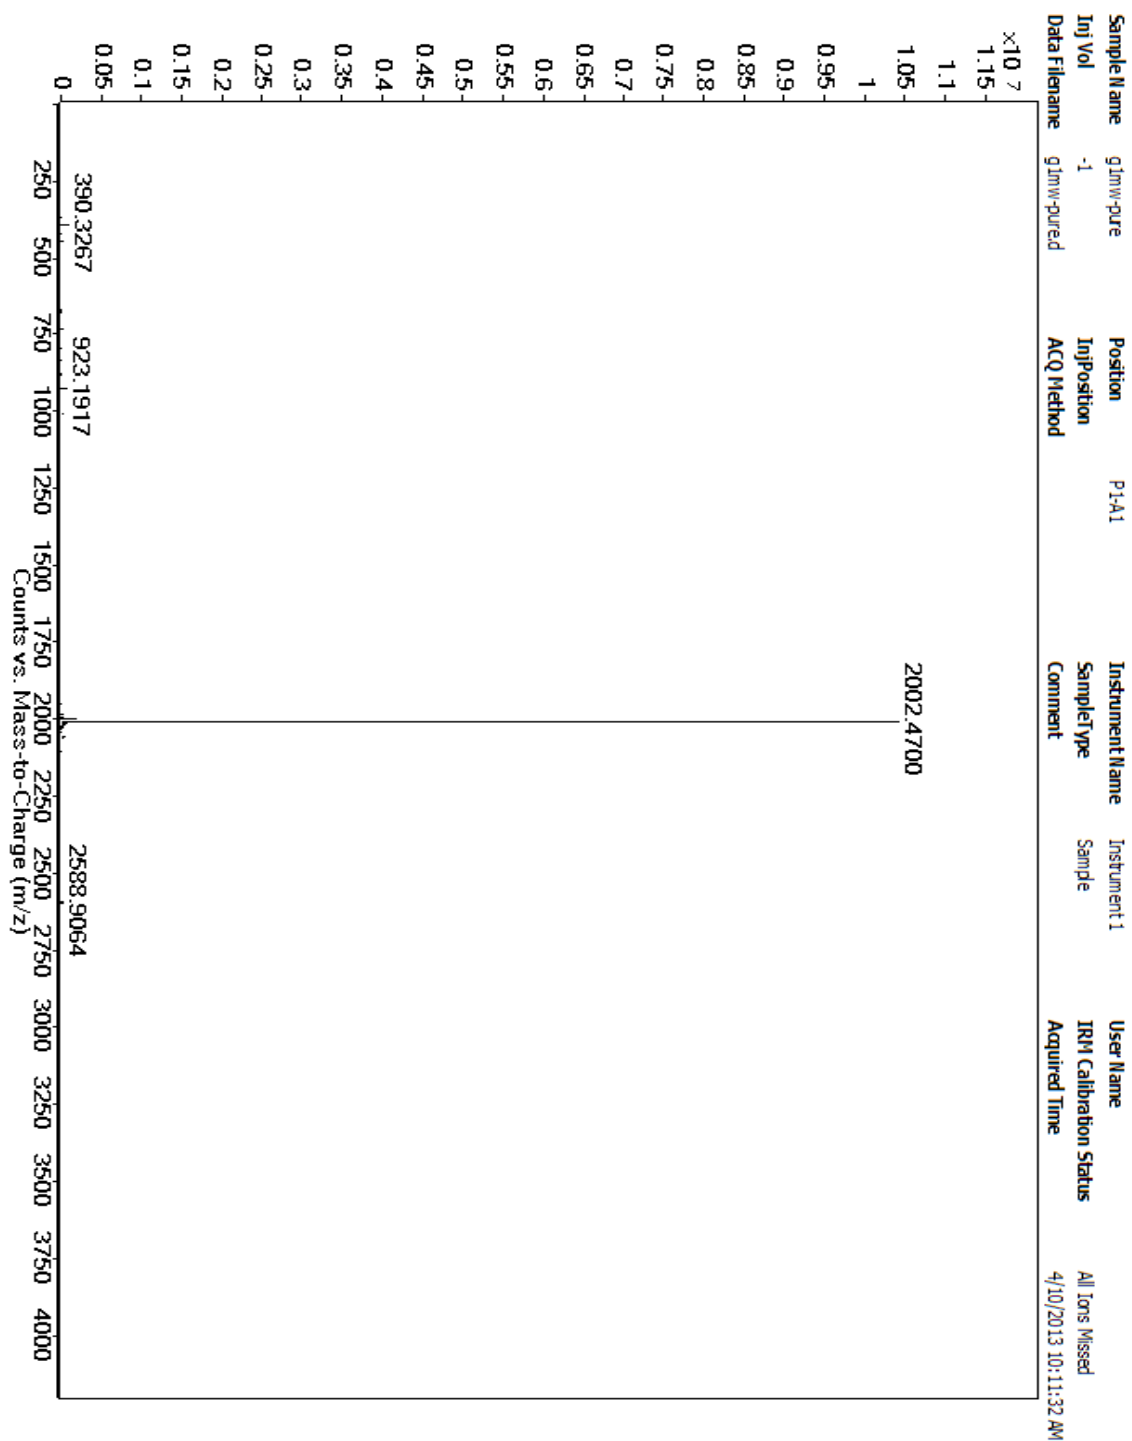

**Compound 9.** A solution of **8** (0.800 g, 0.4 mmol) in concentrated HCl (1.5 mL) and methanol (3 mL) was stirred for 1 min at room temperature and then was irradiated in the microwave while stirring for two periods of 3 minutes at 60°C using dynamic mode and then evaporated under vacuum. The residue was dissolved in chloroform, washed with 5 M NaOH (aq), dried over MgSO<sub>4</sub>, filtered, and evaporated under vacuum to give **9** (0.640 g, quantitative) as a clear oil. <sup>1</sup>H NMR (400 MHz, CDCl<sub>3</sub>) δ 4.21 (br, 2H, HC≡CCH<sub>2</sub>), 3.69-3.47 (m, 88H, CH<sub>2</sub>OCH<sub>2</sub>CH<sub>2</sub>OCH<sub>2</sub>CH<sub>2</sub>OCH<sub>2</sub>, C<sub>3</sub>N<sub>3</sub>-NHCH<sub>2</sub>CH<sub>2</sub>CH<sub>2</sub>O), 2.85 (br, 8H, OCH<sub>2</sub>CH<sub>2</sub>CH<sub>2</sub>NH<sub>2</sub>), 2.30 (br, 1H, HC≡CCH<sub>2</sub>), 1.87-1.76 (m, 24H, OCH<sub>2</sub>CH<sub>2</sub>CH<sub>2</sub>); <sup>13</sup>C NMR (75 MHz, CDCl<sub>3</sub>) δ 166.89 (C<sub>3</sub>N<sub>3</sub>), 70.84 (HC≡CCH<sub>2</sub>), 70.80 (HC≡CCH<sub>2</sub>, OCH<sub>2</sub>CH<sub>2</sub>O), 70.46 (OCH<sub>2</sub>CH<sub>2</sub>O), 70.39 (OCH<sub>2</sub>CH<sub>2</sub>O) 69.63 (CH<sub>2</sub>CH<sub>2</sub>CH<sub>2</sub>O), 69.49 (two lines, CH<sub>2</sub>CH<sub>2</sub>CH<sub>2</sub>O), 39.63 (CH<sub>2</sub>CH<sub>2</sub>CH<sub>2</sub>O), 38.08 (CH<sub>2</sub>CH<sub>2</sub>CH<sub>2</sub>O), 33.33 (OCH<sub>2</sub>CH<sub>2</sub>CH<sub>2</sub>NH<sub>2</sub>), 30.13 (HC≡CCH<sub>2</sub>), 29.67 (NHCH<sub>2</sub>CH<sub>2</sub>CH<sub>2</sub>O); MS (ESI-TOF) calcd for C<sub>72</sub>H<sub>140</sub>N<sub>22</sub>O<sub>18</sub> 1601.0716, found 1602.0498 (M + H)<sup>+</sup>.

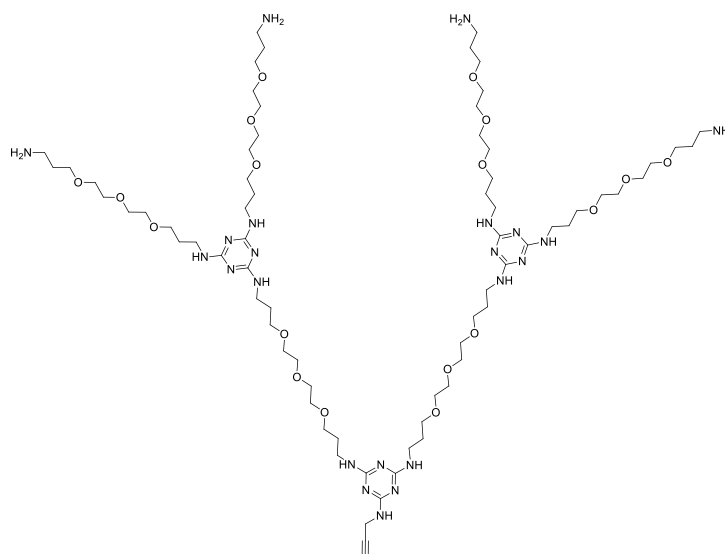

Figure S25.  $^1\text{H}$  NMR Spectrum of **9**.

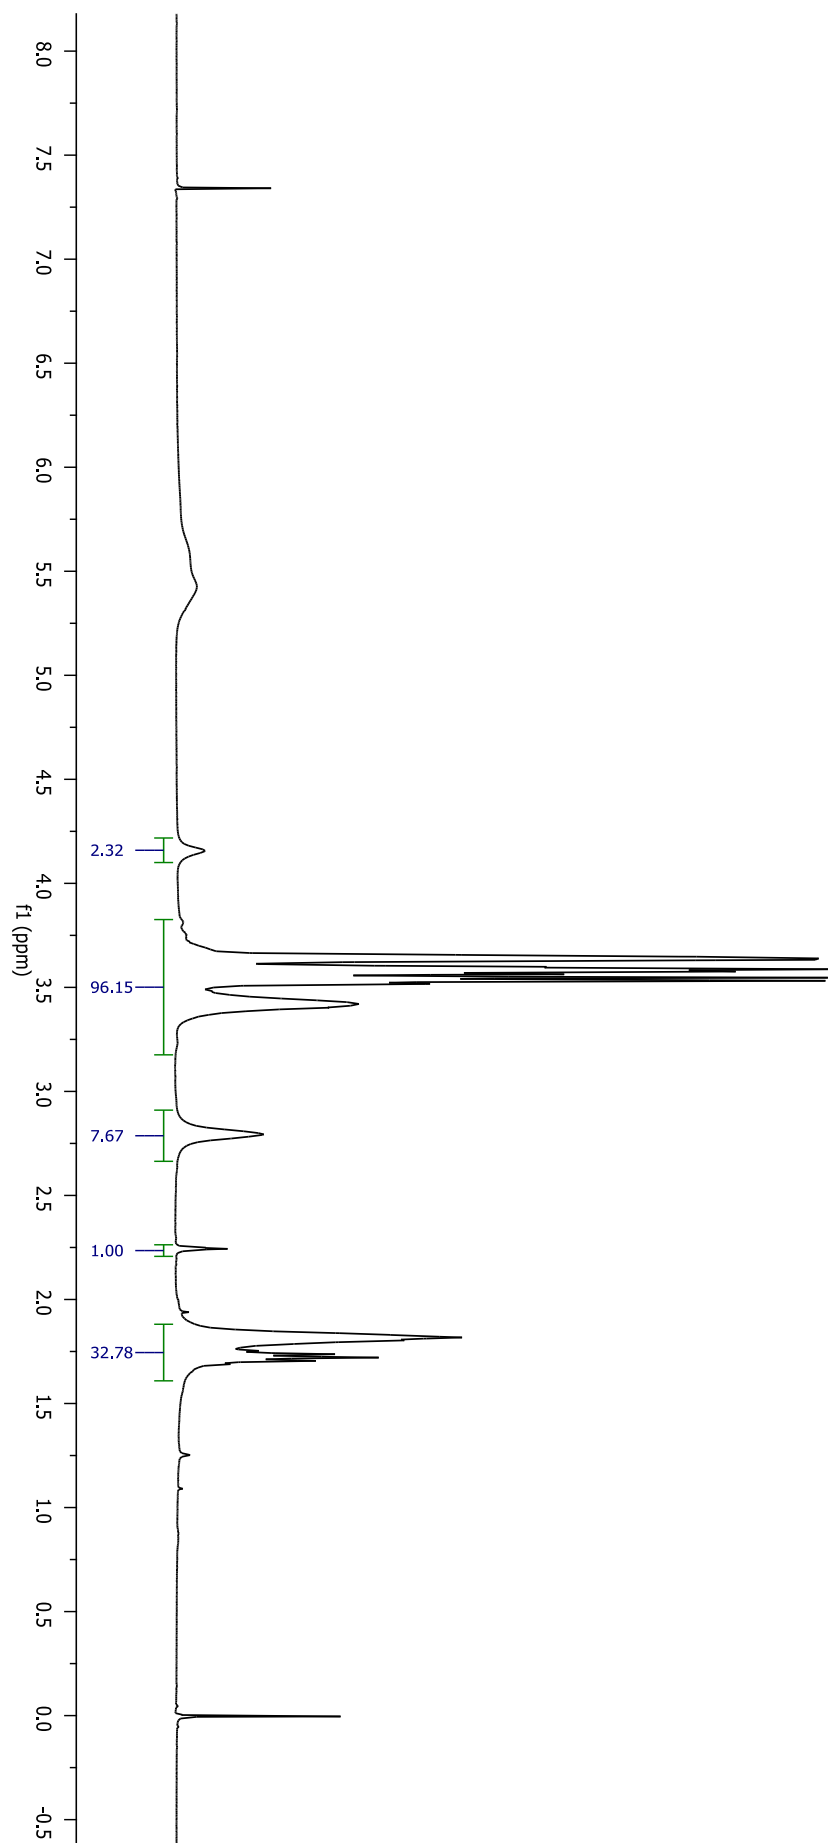

Figure S26.  $^{13}\text{C}$  NMR Spectrum of **9**.

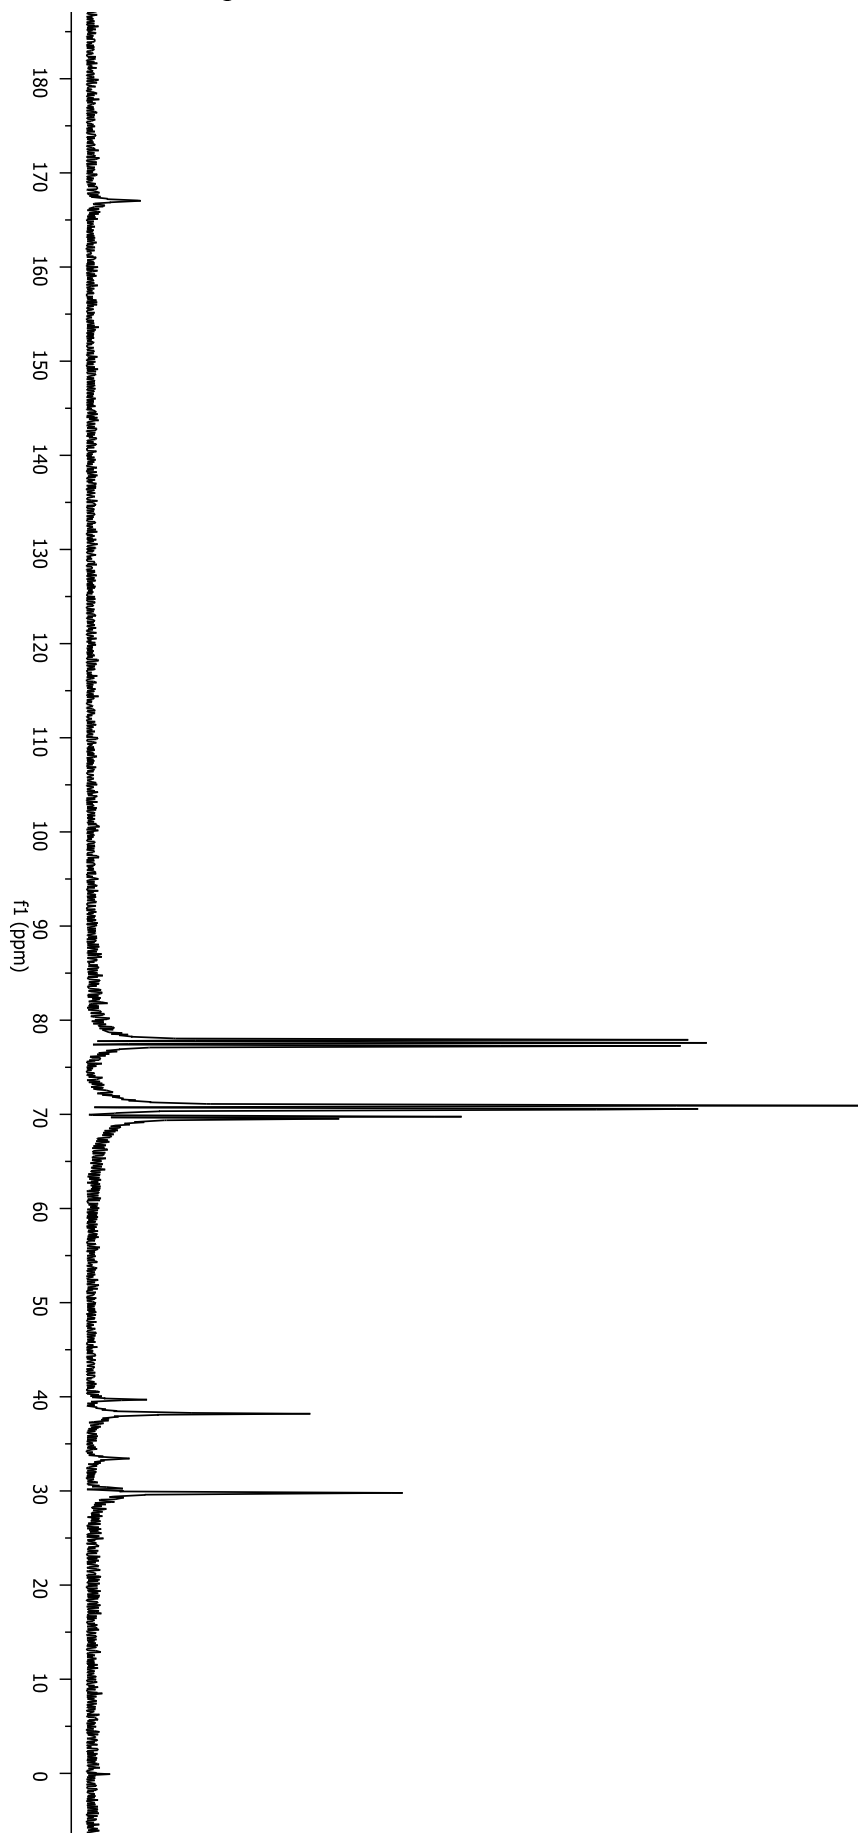

Figure S27. Mass Spectrum of 9.

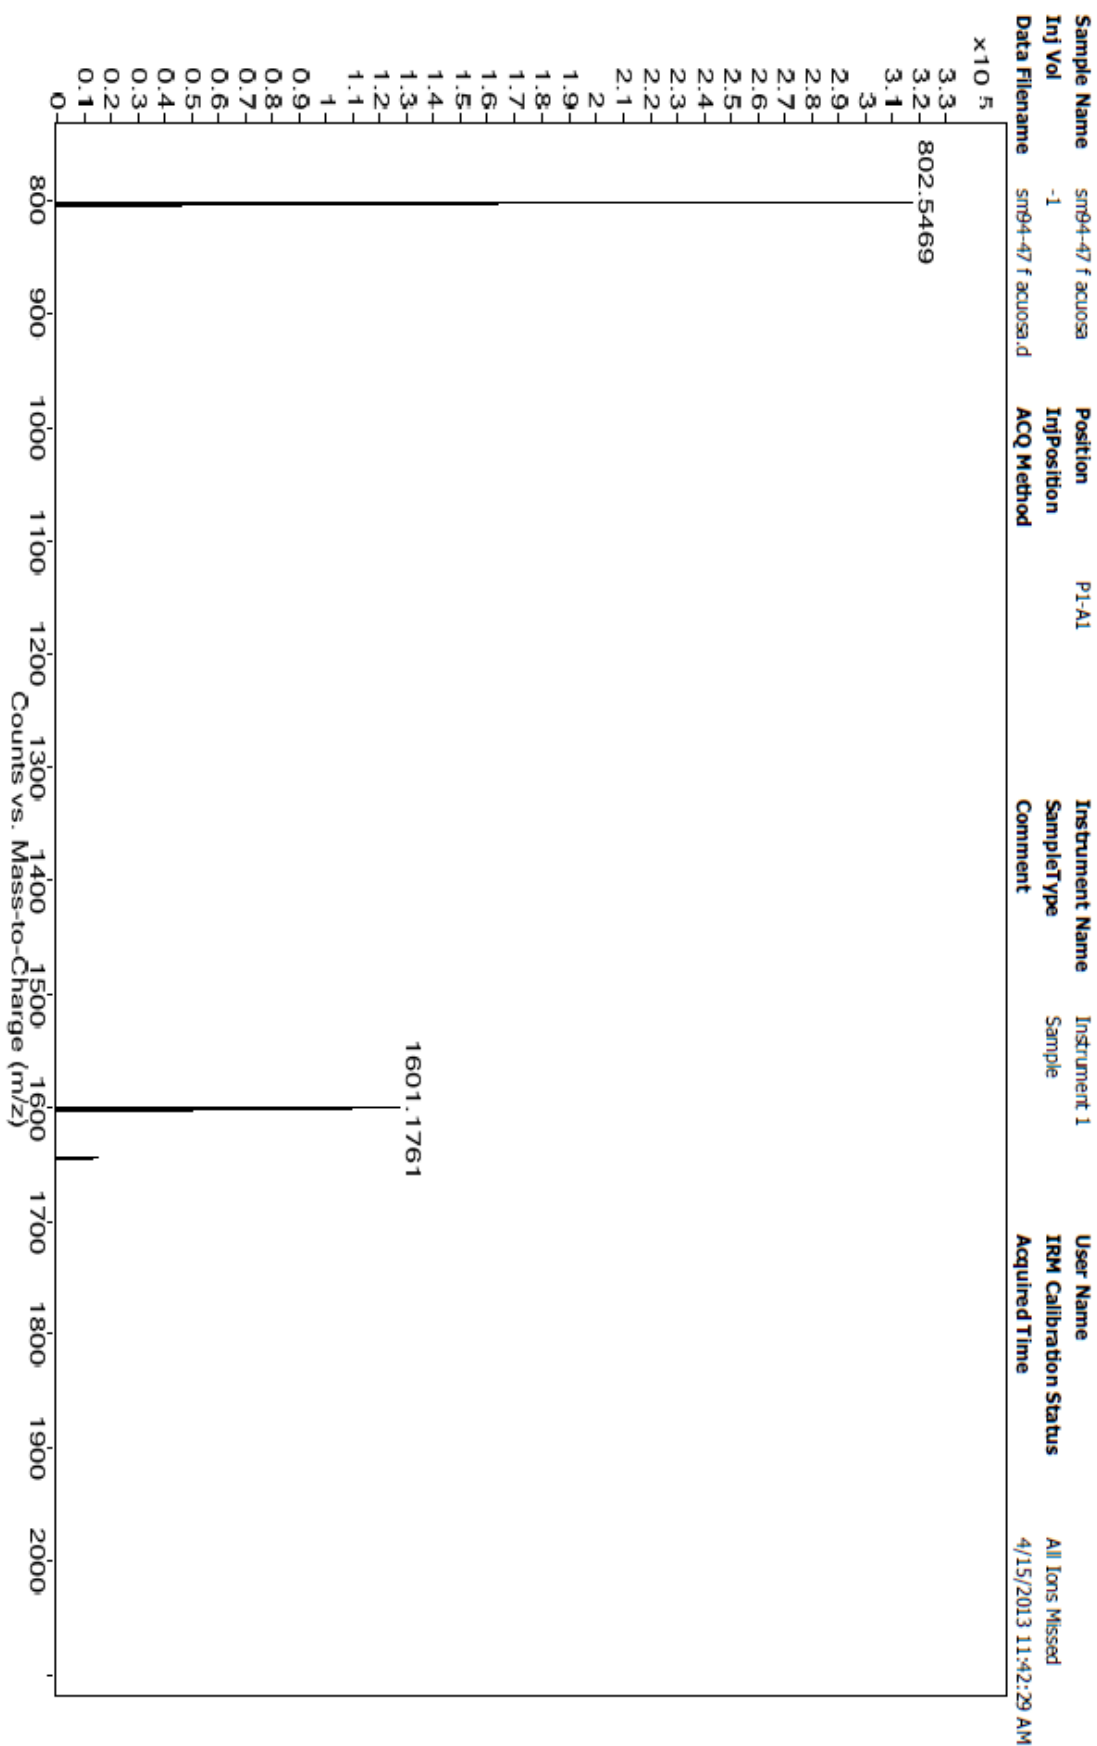

**Compound 10 (G2 alkyne).** A solution of propargylamine (0.0125 g, 0.2245 mmol), **5** (0.100 g, 0.022 mmol), and Cs<sub>2</sub>CO<sub>3</sub> (0.022g, 0.066 mmol) in dioxane (0.3 mL) was stirred for 2 minutes. Then, the solution was irradiated in the microwave while stirring (CEM SP Discovery) for three periods of 30 minutes at 95°C using dynamic mode. In each extra period were added 10 equivalents more of propargylamine (0.0375g, 0.6735mmol) to give a total of 30 equivalents in the final solution and then evaporated under vacuum. The residue was dissolved in dichloromethane, washed with brine solution and dried over MgSO<sub>4</sub>, filtered, and evaporated under vacuum. The crude product was purified by silica gel chromatography (DCM:MeOH = 10:1 to DCM:MeOH = 7:1) to give **10** (0.093 g, 93% ) as a clear oil. <sup>1</sup>H NMR (300 MHz, CDCl<sub>3</sub>) δ 4.16 (br, 2H, HC≡CCH<sub>2</sub>), 3.64-3.43 (m, 102H, CH<sub>2</sub>OCH<sub>2</sub>CH<sub>2</sub>OCH<sub>2</sub>CH<sub>2</sub>OCH<sub>2</sub>, C<sub>3</sub>N<sub>3</sub>-NHCH<sub>2</sub>CH<sub>2</sub>CH<sub>2</sub>O), 3.21 (br m, 16H, BocNHCH<sub>2</sub>), 2.25 (br, 1H, HC≡CCH<sub>2</sub>), 1.82-1.73 (m, 56H, OCH<sub>2</sub>CH<sub>2</sub>CH<sub>2</sub>), 1.43 (s, 72H, C(CH<sub>3</sub>)<sub>3</sub>); <sup>13</sup>C NMR (75 MHz, CDCl<sub>3</sub>) δ 166.82 (br, C<sub>3</sub>N<sub>3</sub>), 157.03 (CO), not found (HC≡CCH<sub>2</sub>), 79.34 (C(CH<sub>3</sub>)<sub>3</sub>), 70.7 (HC≡CCH<sub>2</sub>), 70.96 (OCH<sub>2</sub>CH<sub>2</sub>O), 69.95 (OCH<sub>2</sub>CH<sub>2</sub>O), 69.93 (OCH<sub>2</sub>CH<sub>2</sub>O) 69.67 (CH<sub>2</sub>CH<sub>2</sub>CH<sub>2</sub>O), 69.56 (CH<sub>2</sub>CH<sub>2</sub>CH<sub>2</sub>O), 38.78 (CH<sub>2</sub>CH<sub>2</sub>CH<sub>2</sub>O), 38.40 (CH<sub>2</sub>CH<sub>2</sub>CH<sub>2</sub>O), not found (HC≡CCH<sub>2</sub>), 29.85 (NHCH<sub>2</sub>CH<sub>2</sub>CH<sub>2</sub>O), 28.65 (C(CH<sub>3</sub>)<sub>3</sub>); MS (ESI-TOF) calcd for C<sub>204</sub>H<sub>348</sub>N<sub>50</sub>O<sub>58</sub> 4462.8636 found 4464.9714 (M + H)<sup>+</sup>.

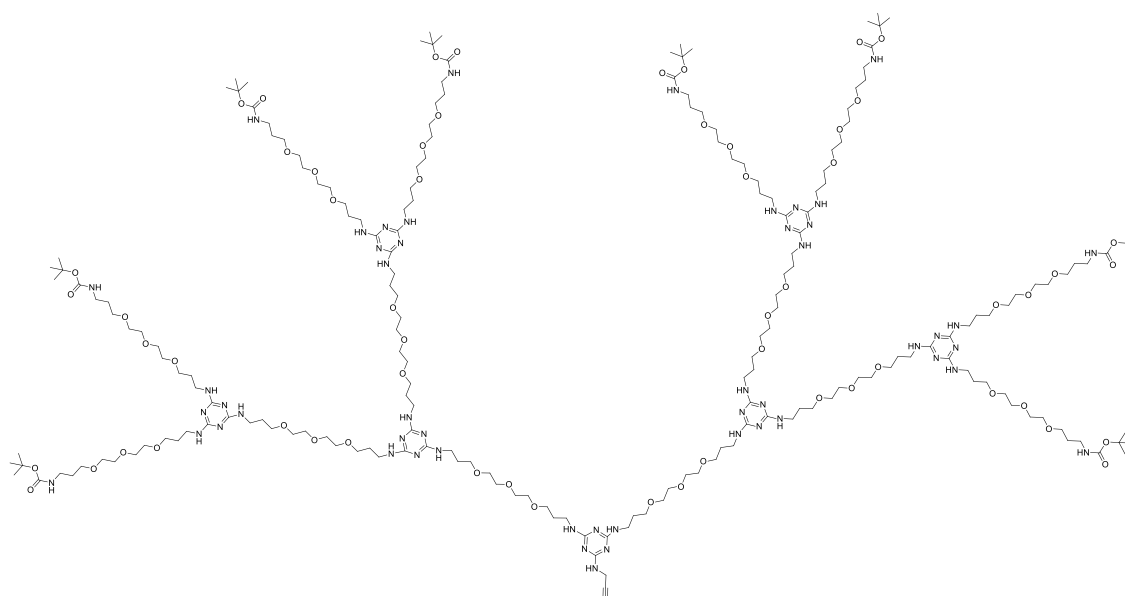



Figure S28.  $^1\text{H}$  NMR Spectrum of **10**.

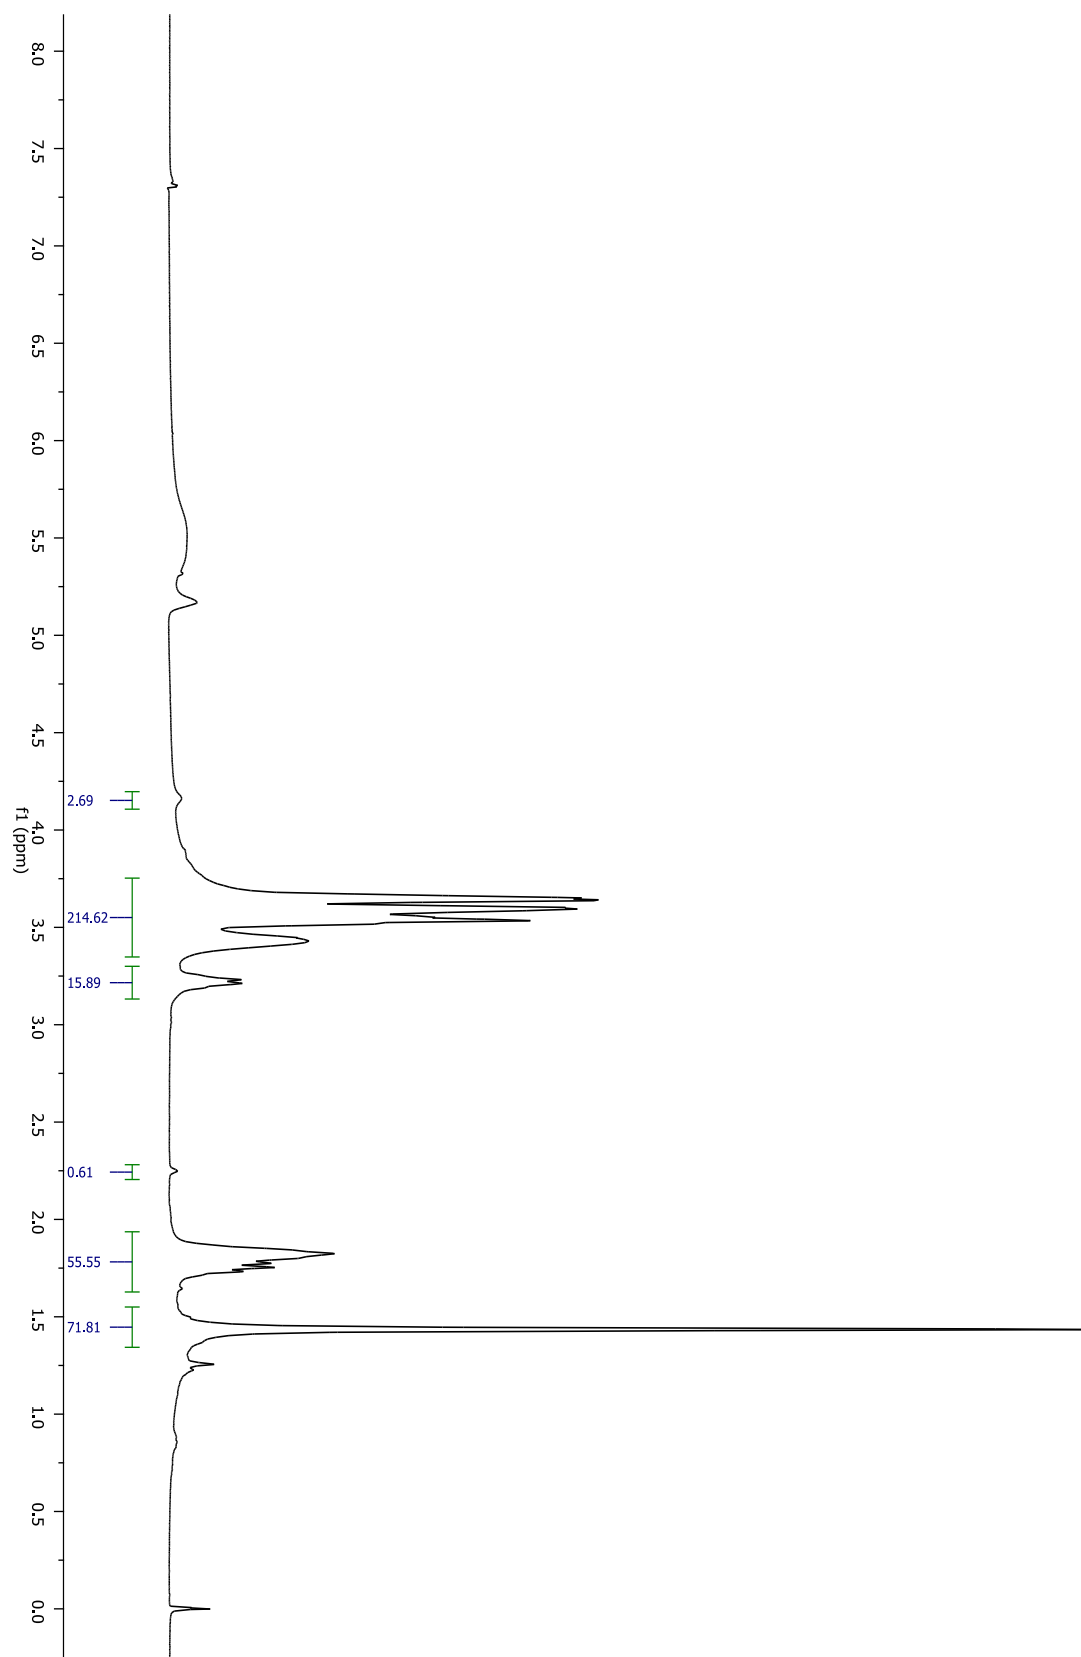

Figure S29.  $^{13}\text{C}$  NMR Spectrum of **10**.

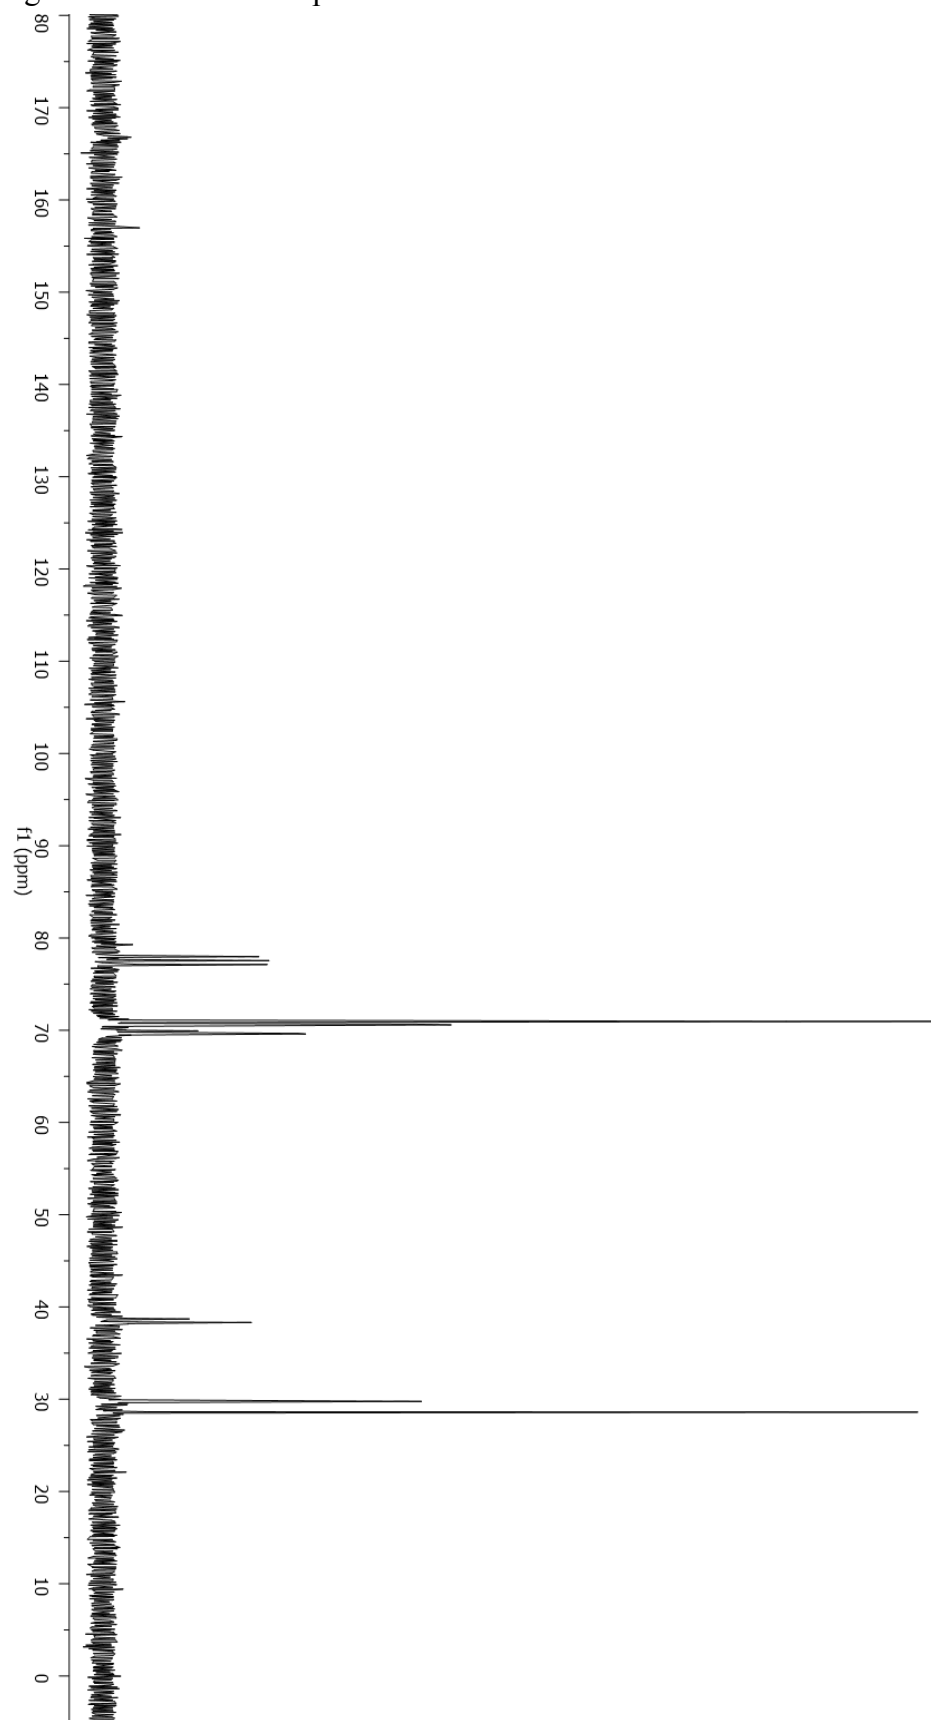

Figure S30. Mass Spectrum of **10**.

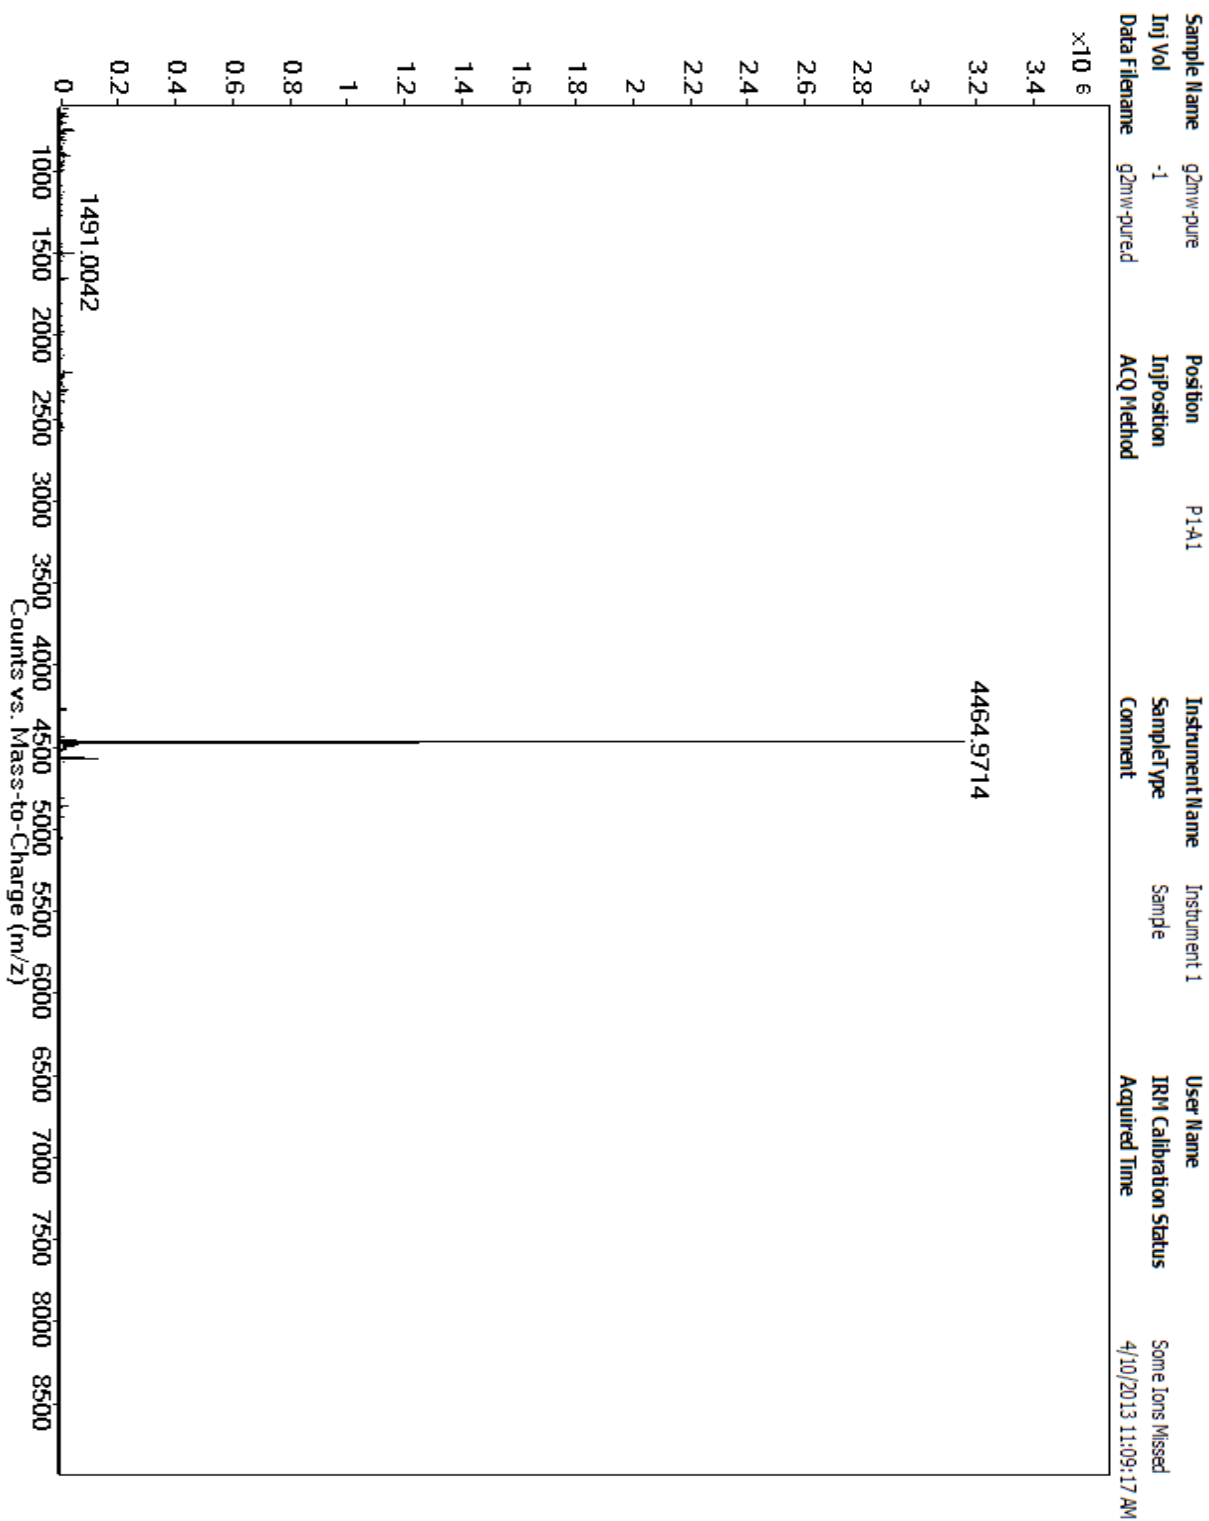

**Compound 11.** A solution of **10** (0.093 g, 0.020 mmol) in concentrated HCl (0.5 mL) and methanol (1 mL) was stirred for 1 min at room temperature and then was irradiated in the microwave while stirring (CEM SP Discovery) for two periods of 3 minutes at 60°C using dynamic mode and then evaporated under vacuum. The residue was dissolved in chloroform, washed with 5 M NaOH (aq), dried over MgSO<sub>4</sub>, filtered, and evaporated under vacuum to give **11** (0.075 g, quantitative) as a clear oil. <sup>1</sup>H NMR (400 MHz, CDCl<sub>3</sub>) δ 4.14 (br, 2H, HC≡CCH<sub>2</sub>), 3.62-3.40 (m, 102H, CH<sub>2</sub>OCH<sub>2</sub>CH<sub>2</sub>OCH<sub>2</sub>CH<sub>2</sub>OCH<sub>2</sub>, C<sub>3</sub>N<sub>3</sub>-NHCH<sub>2</sub>CH<sub>2</sub>CH<sub>2</sub>O), 2.77 (br, 16H, OCH<sub>2</sub>CH<sub>2</sub>CH<sub>2</sub>NH<sub>2</sub>), 2.21 (br, 1H, HC≡CCH<sub>2</sub>), 1.80-1.68 (m, 56H, OCH<sub>2</sub>CH<sub>2</sub>CH<sub>2</sub>); <sup>13</sup>C NMR (75 MHz, CDCl<sub>3</sub>) δ 166.94 (C<sub>3</sub>N<sub>3</sub>), 81.1 (HC≡CCH<sub>2</sub>), not found (HC≡CCH<sub>2</sub>, OCH<sub>2</sub>CH<sub>2</sub>O), 70.88 (OCH<sub>2</sub>CH<sub>2</sub>O), 70.49 (two lines, OCH<sub>2</sub>CH<sub>2</sub>O) 69.66 (CH<sub>2</sub>CH<sub>2</sub>CH<sub>2</sub>O), 69.48 (two lines, CH<sub>2</sub>CH<sub>2</sub>CH<sub>2</sub>O), 39.63 (CH<sub>2</sub>CH<sub>2</sub>CH<sub>2</sub>O), 38.13 (CH<sub>2</sub>CH<sub>2</sub>CH<sub>2</sub>O), 33.44 (OCH<sub>2</sub>CH<sub>2</sub>CH<sub>2</sub>NH<sub>2</sub>), not found (HC≡CCH<sub>2</sub>), 29.7 (NHCH<sub>2</sub>CH<sub>2</sub>CH<sub>2</sub>O); MS (ESI-TOF) calcd for C<sub>164</sub>H<sub>320</sub>N<sub>50</sub>O<sub>42</sub> 3662.4441, found 3664.5145 (M + H)<sup>+</sup>.

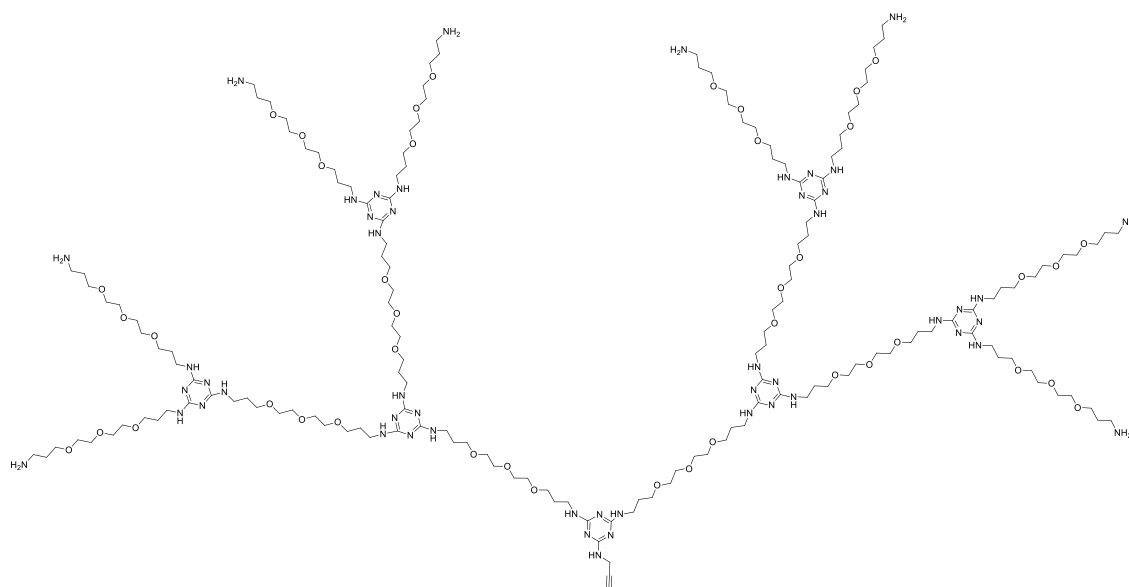

Figure S31.  $^1\text{H}$  NMR Spectrum of **11**.

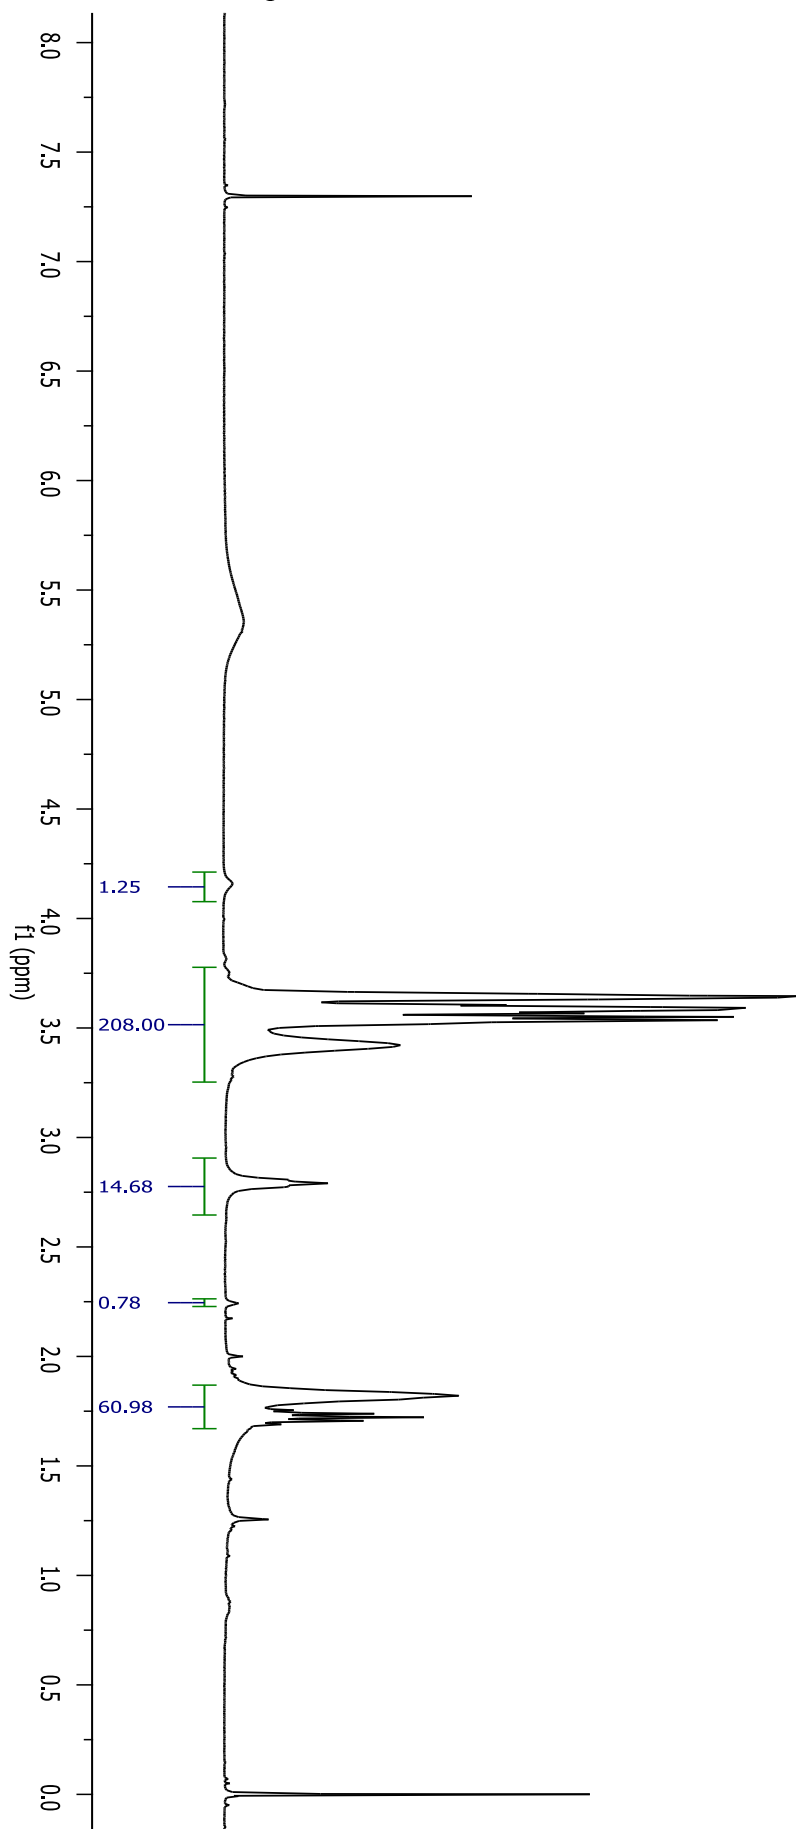

Figure S32.  $^{13}\text{C}$  NMR Spectrum of **11**.

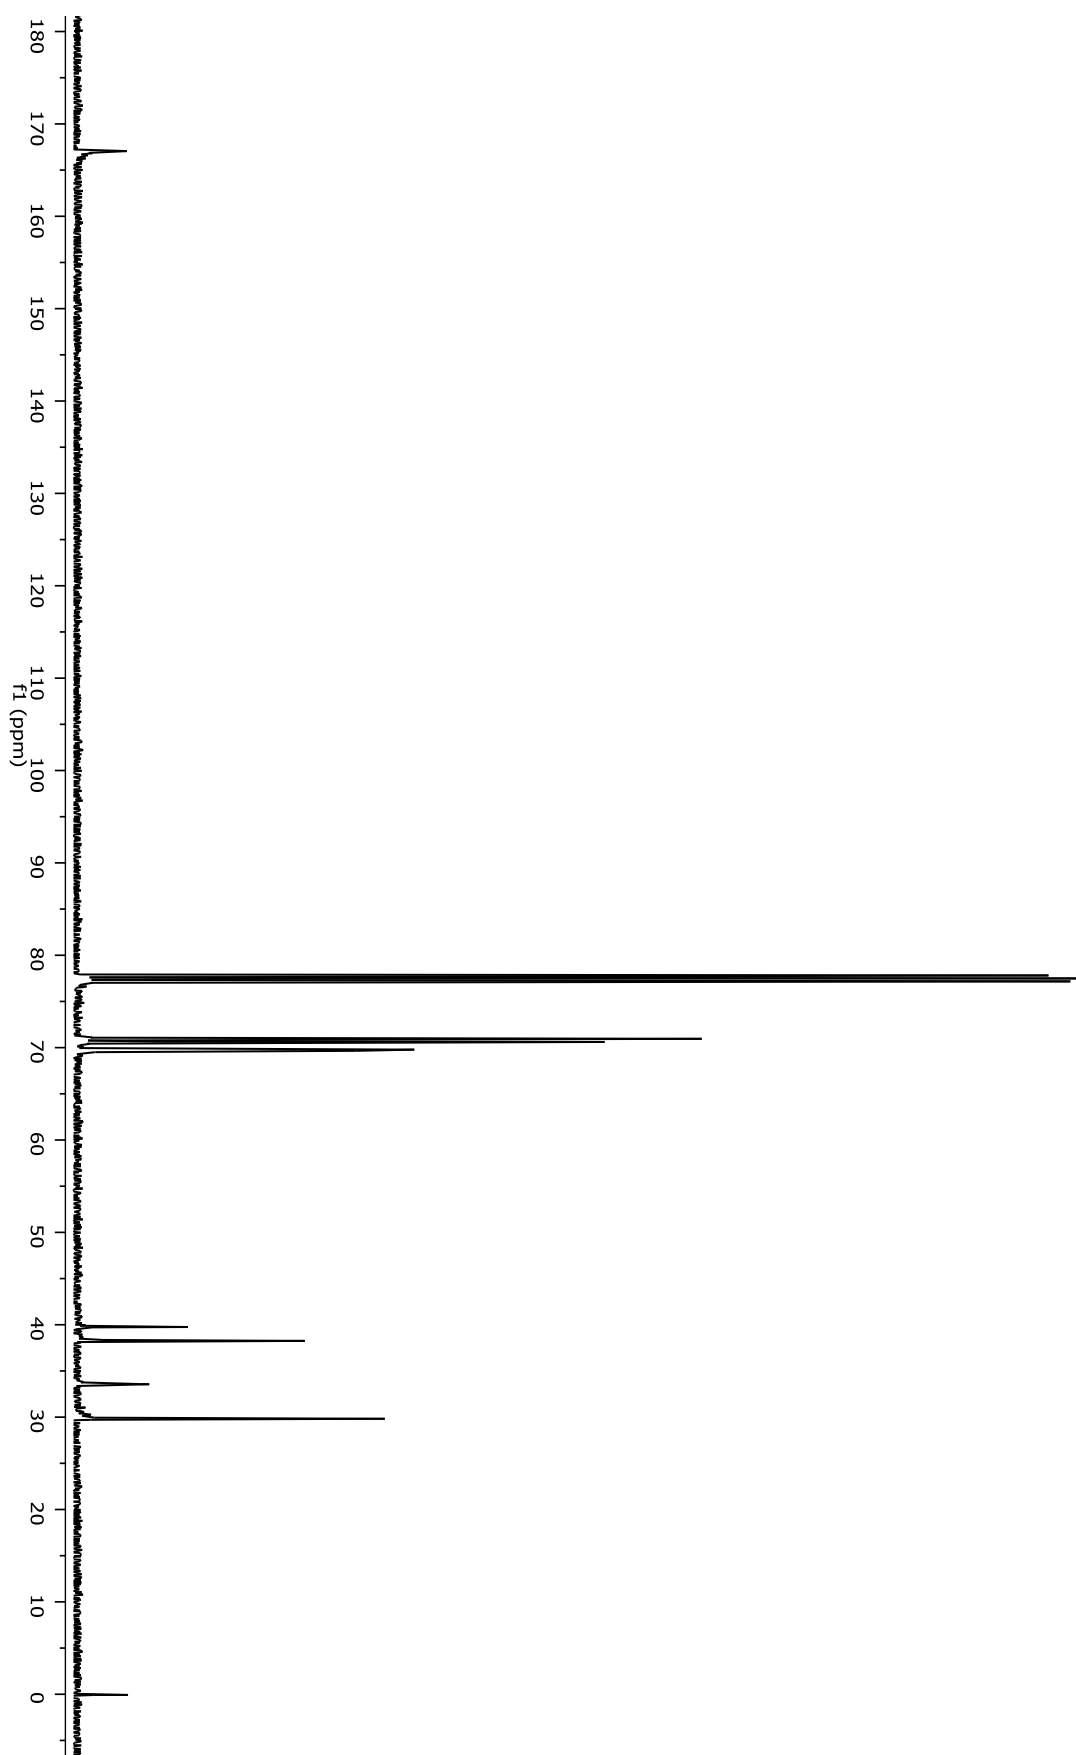

Figure S33. Mass Spectrum of 11.

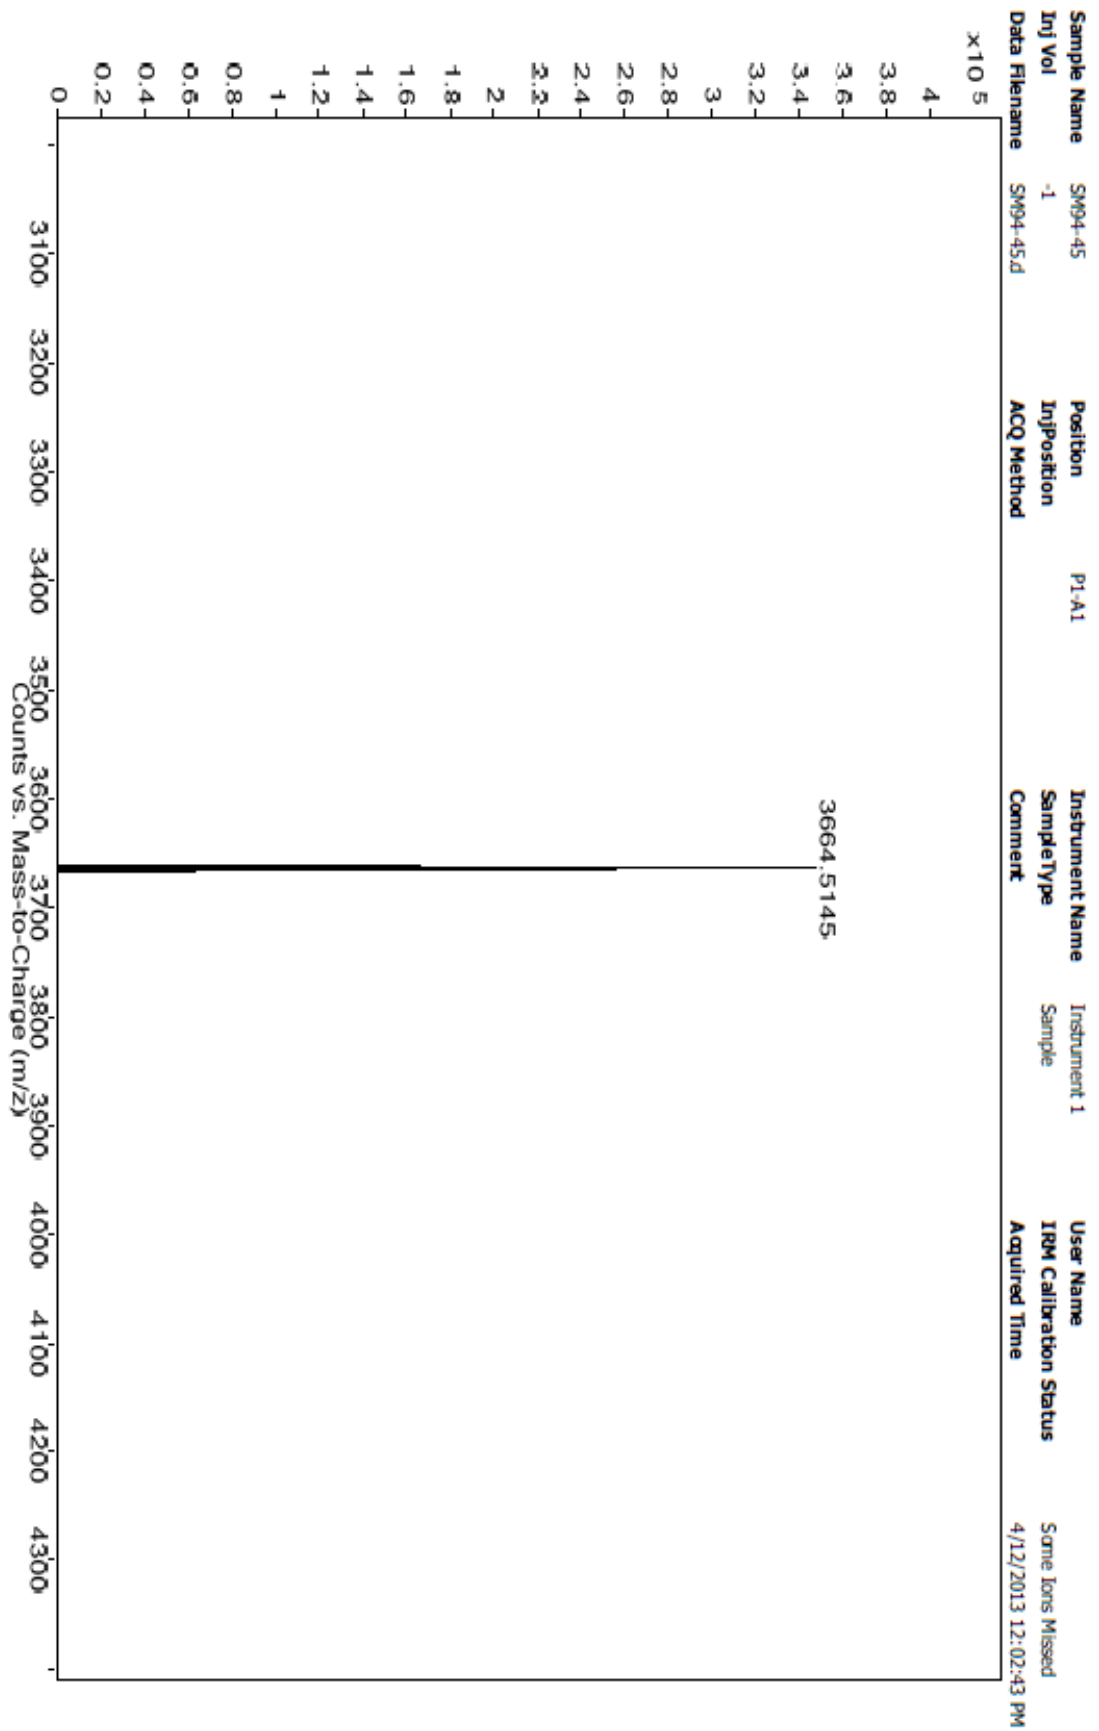

**Compound 12.** A solution of propargylamine (0.0076 g, 0.0137 mmol), **7** (0.128 g, 0.0137 mmol), and Cs<sub>2</sub>CO<sub>3</sub> (0.0145g, 0.041 mmol) in dioxane (0.2 mL) was stirred for 2 minutes. Then, the solution was irradiated in the microwave while stirring for three periods of 30 minutes at 95°C using dynamic mode. In each extra period were added 10 equivalents more of propargylamine (0.023 g, .041 mmol) to give a total of 30 equivalents in the final solution and then evaporated under vacuum. The residue was dissolved in dichloromethane, washed with brine solution and dried over MgSO<sub>4</sub>, filtered, and evaporated under vacuum. The crude product was purified by silica gel chromatography (DCM:MeOH = 10:1 to DCM:MeOH = 7:1) to give **12** (0.087 g, 68% ) as a clear wax. <sup>1</sup>H NMR (300 MHz, CDCl<sub>3</sub>) δ 4.05 (br, 2H, HC≡CCH<sub>2</sub>), 3.51-3.29 (m, 448H, CH<sub>2</sub>OCH<sub>2</sub>CH<sub>2</sub>OCH<sub>2</sub>CH<sub>2</sub>OCH<sub>2</sub>, C<sub>3</sub>N<sub>3</sub>-NHCH<sub>2</sub>CH<sub>2</sub>CH<sub>2</sub>O), 3.08 (br m, 32H, BocNHCH<sub>2</sub>), 2.17 (br, 1H, HC≡CCH<sub>2</sub>), 1.69-1.60 (m, 120H, OCH<sub>2</sub>CH<sub>2</sub>CH<sub>2</sub>), 1.31 (s, 144H, C(CH<sub>3</sub>)<sub>3</sub>); <sup>13</sup>C NMR (75 MHz, CDCl<sub>3</sub>) δ 165.7 (C<sub>3</sub>N<sub>3</sub>), 155.9 (CO), 81.1 (not found, HC≡CCH<sub>2</sub>), 78.6 (C(CH<sub>3</sub>)<sub>3</sub>), 70.5 (not found, HC≡CCH<sub>2</sub>), 70.4 (OCH<sub>2</sub>CH<sub>2</sub>O), 70.0 (two lines, OCH<sub>2</sub>CH<sub>2</sub>O), 69.3 (CH<sub>2</sub>CH<sub>2</sub>CH<sub>2</sub>O), 69.1 (CH<sub>2</sub>CH<sub>2</sub>CH<sub>2</sub>O), 69.0 (CH<sub>2</sub>CH<sub>2</sub>CH<sub>2</sub>O), 38.3 (CH<sub>2</sub>CH<sub>2</sub>CH<sub>2</sub>O), 37.8 (CH<sub>2</sub>CH<sub>2</sub>CH<sub>2</sub>O), 30.1 (not found, HC≡CCH<sub>2</sub>), 29.5 (NHCH<sub>2</sub>CH<sub>2</sub>CH<sub>2</sub>O), 28.3 (C(CH<sub>3</sub>)<sub>3</sub>); MS (ESI-TOF) calcd for C<sub>428</sub>H<sub>808</sub>N<sub>106</sub>O<sub>122</sub> 9386.03, found 9392.20 (M + H)<sup>+</sup>.

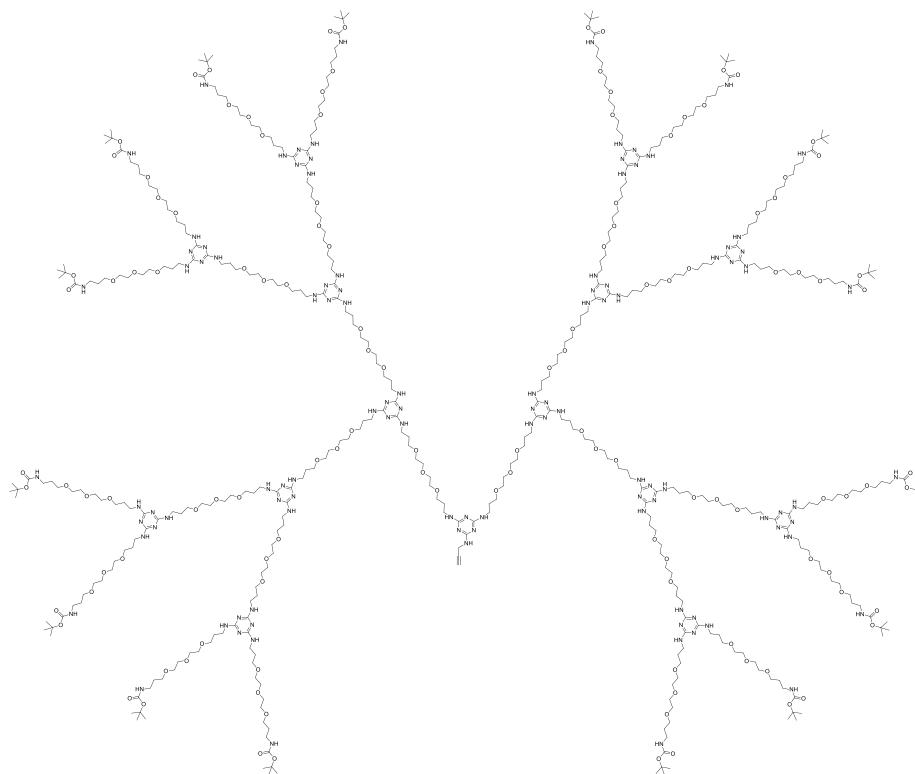



Figure S34.  $^1\text{H}$  NMR Spectrum of **12**.

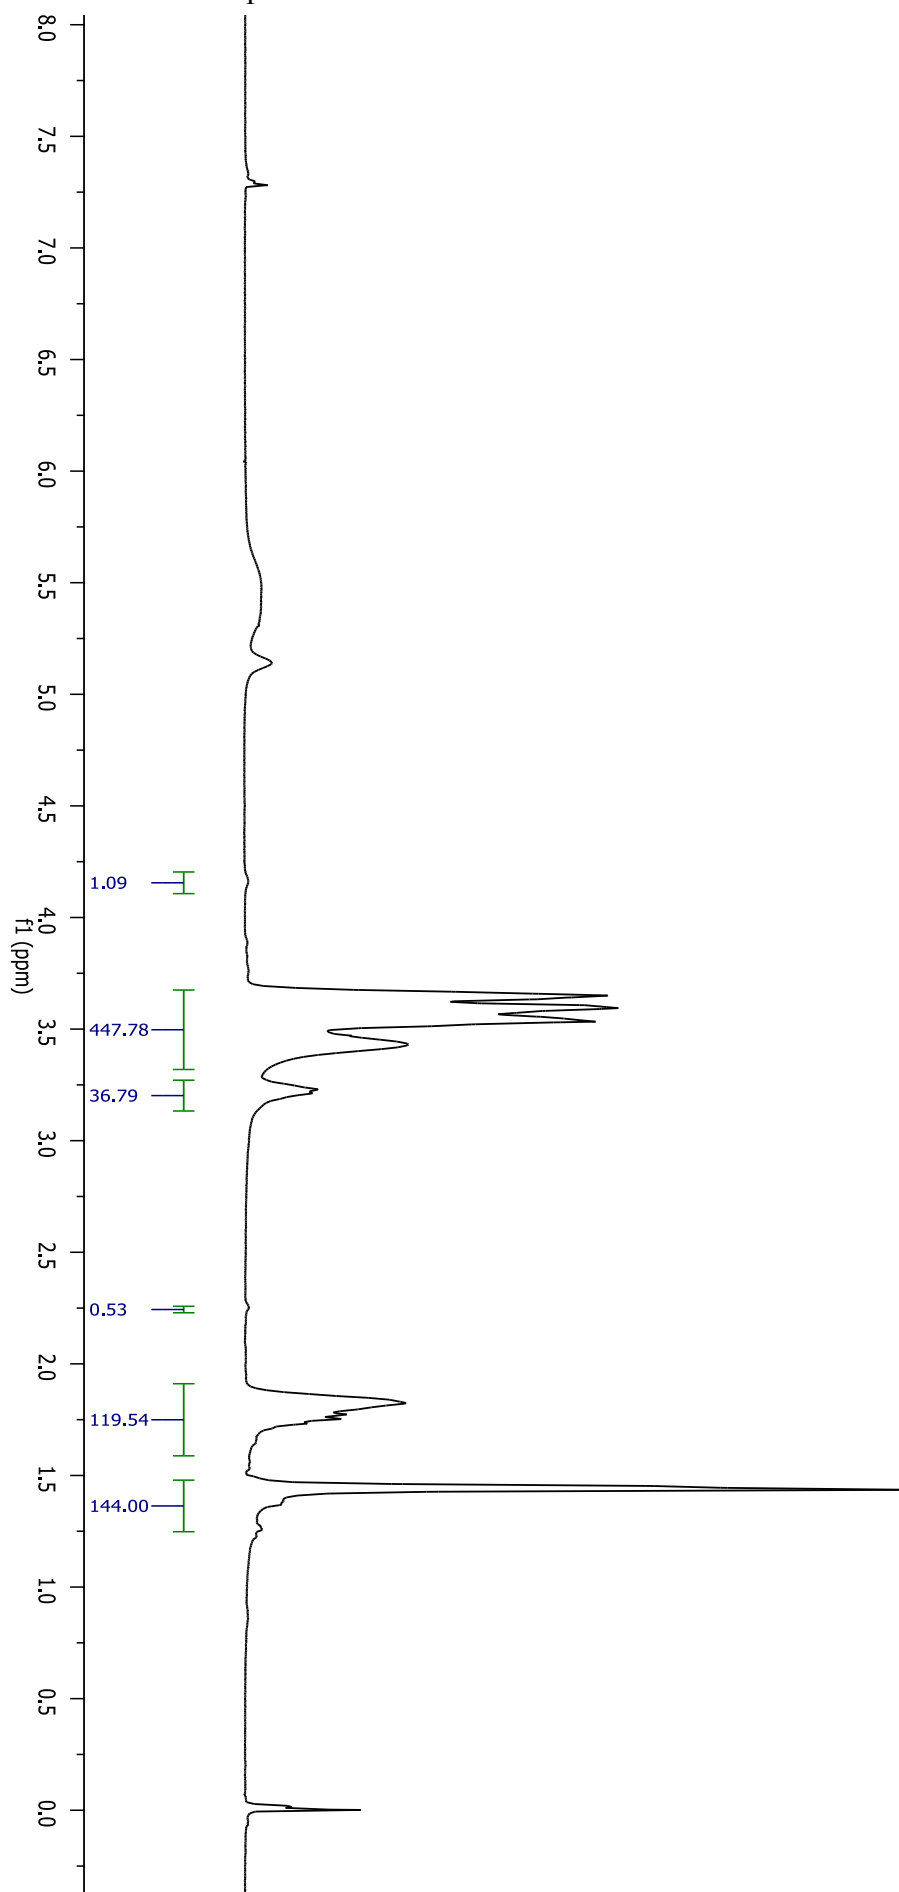

Figure S35.  $^{13}\text{C}$  NMR Spectrum of **12**.

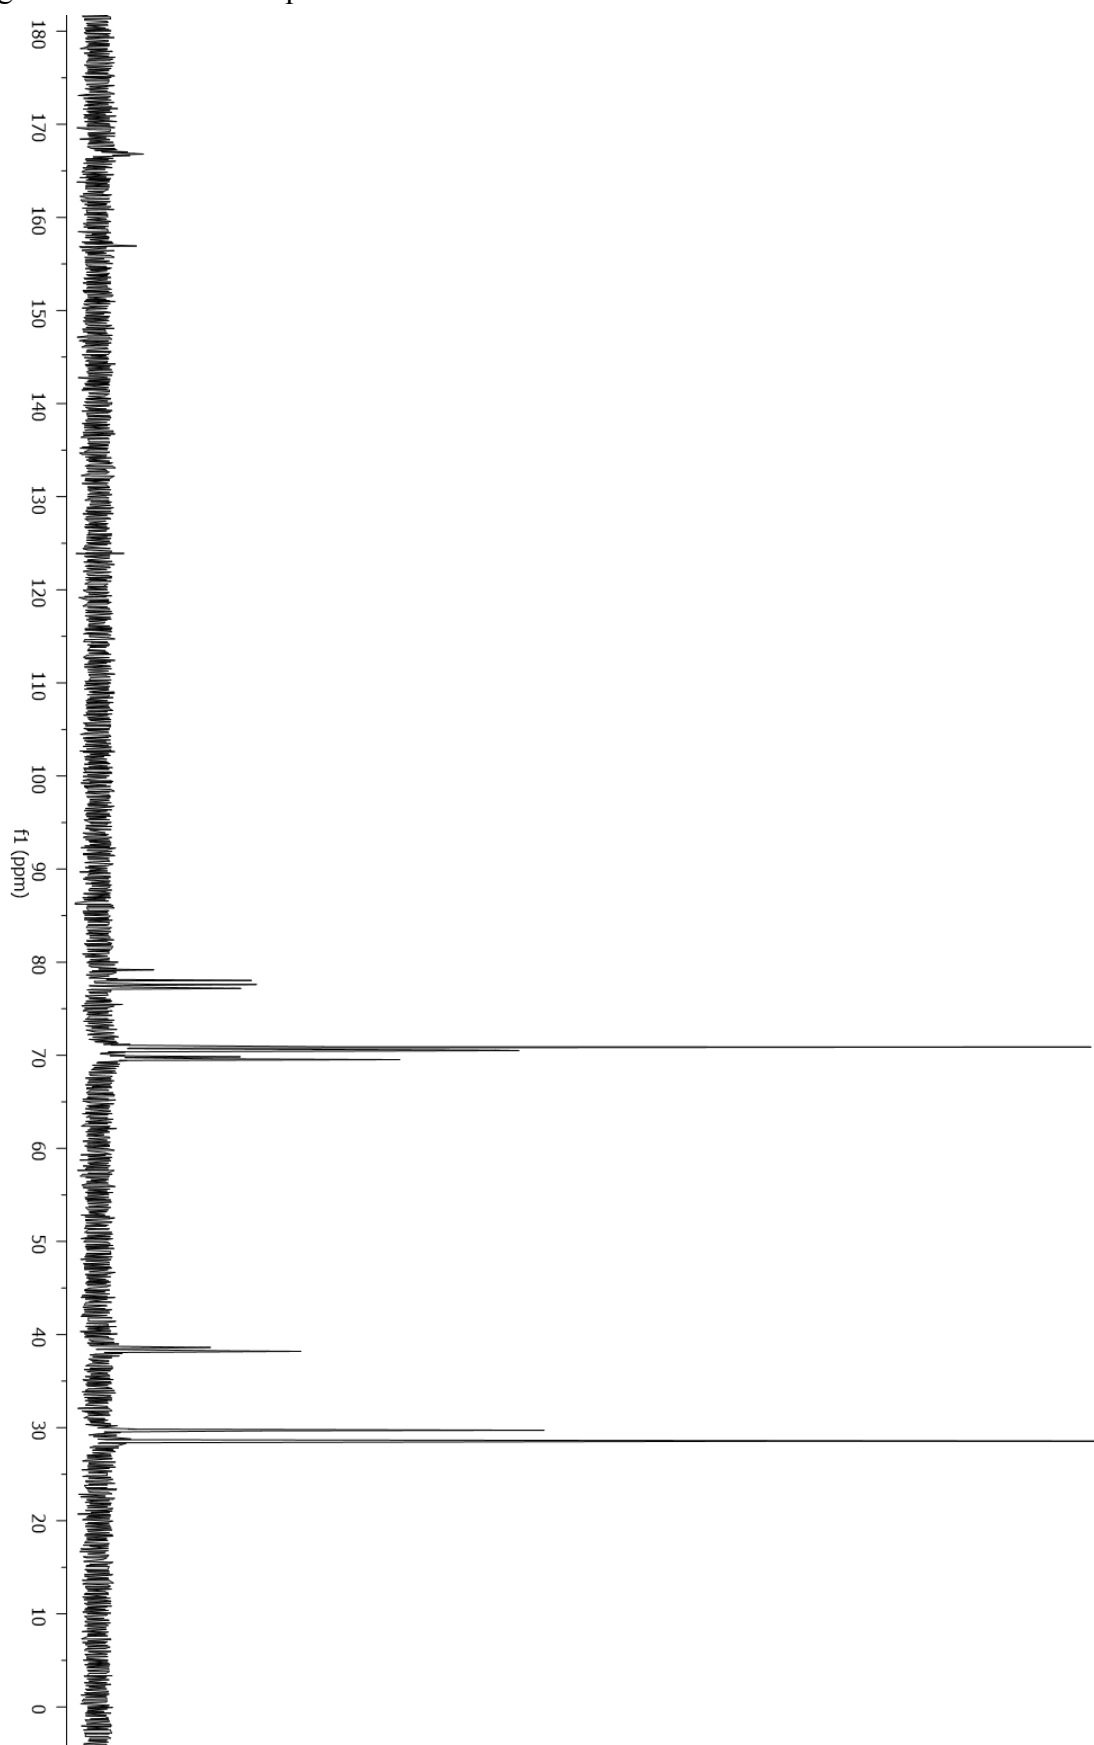

Figure S36. Mass Spectrum of 12.

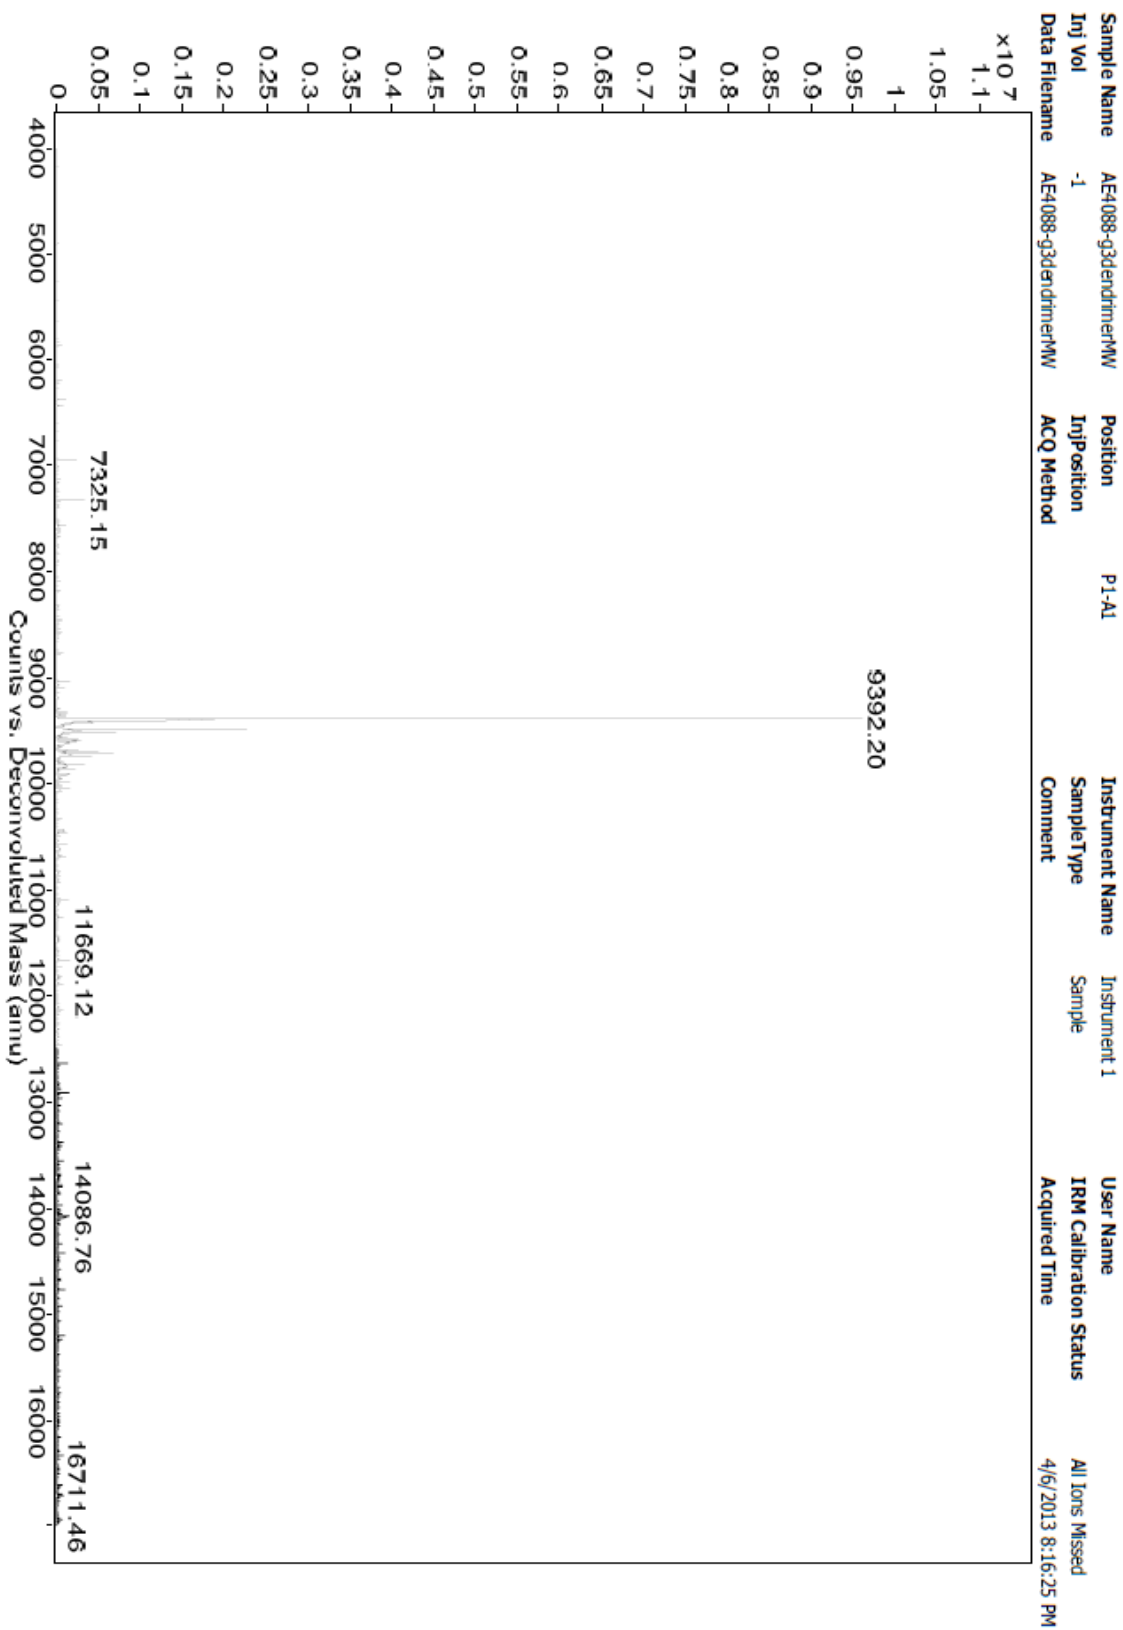

**Compound 13.** A solution of **12** (0.087 g, 0.009 mmol) in concentrated HCl (0.5 mL) and methanol (1 mL) was stirred for 1 min at room temperature and then was irradiated in the microwave while stirring for two periods of 3 minutes at 60°C using dynamic mode and then evaporated under vacuum. The residue was dissolved in chloroform, washed with 5 M NaOH (aq), dried over MgSO<sub>4</sub>, filtered, and evaporated under vacuum to give **13** (0.070 g, quantitative) as a clear oil. <sup>1</sup>H NMR (300 MHz, CDCl<sub>3</sub>) δ 4.12 (br, 2H, HC≡CCH<sub>2</sub>), 3.60-3.38 (m, 448H, CH<sub>2</sub>OCH<sub>2</sub>CH<sub>2</sub>OCH<sub>2</sub>CH<sub>2</sub>OCH<sub>2</sub>, C<sub>3</sub>N<sub>3</sub>-NHCH<sub>2</sub>CH<sub>2</sub>CH<sub>2</sub>O), 2.78 (br, 32H, OCH<sub>2</sub>CH<sub>2</sub>CH<sub>2</sub>NH<sub>2</sub>), 2.22 (br, 1H, HC≡CCH<sub>2</sub>), 1.78-1.69 (m, 120H, OCH<sub>2</sub>CH<sub>2</sub>CH<sub>2</sub>); <sup>13</sup>C NMR (75 MHz, CDCl<sub>3</sub>) δ 166.1 (C<sub>3</sub>N<sub>3</sub>), 81.1 (not found, HC≡CCH<sub>2</sub>), 70.6 (OCH<sub>2</sub>CH<sub>2</sub>O), 70.5 (HC≡CCH<sub>2</sub>), 70.3 (OCH<sub>2</sub>CH<sub>2</sub>O), 70.2 (OCH<sub>2</sub>CH<sub>2</sub>O), 69.5 (CH<sub>2</sub>CH<sub>2</sub>CH<sub>2</sub>O), 69.4 (CH<sub>2</sub>CH<sub>2</sub>CH<sub>2</sub>O), 69.3 (CH<sub>2</sub>CH<sub>2</sub>CH<sub>2</sub>O), 39.6 (CH<sub>2</sub>CH<sub>2</sub>CH<sub>2</sub>O), 38.1 (CH<sub>2</sub>CH<sub>2</sub>CH<sub>2</sub>O), 32.9 (OCH<sub>2</sub>CH<sub>2</sub>CH<sub>2</sub>NH<sub>2</sub>), 30.1 (not found, HC≡CCH<sub>2</sub>), 29.7 (NHCH<sub>2</sub>CH<sub>2</sub>CH<sub>2</sub>O); MS (ESI-TOF) calcd for C<sub>348</sub>H<sub>680</sub>N<sub>106</sub>O<sub>90</sub> 7785.19, found 7790.0851 (M + H)<sup>+</sup>.

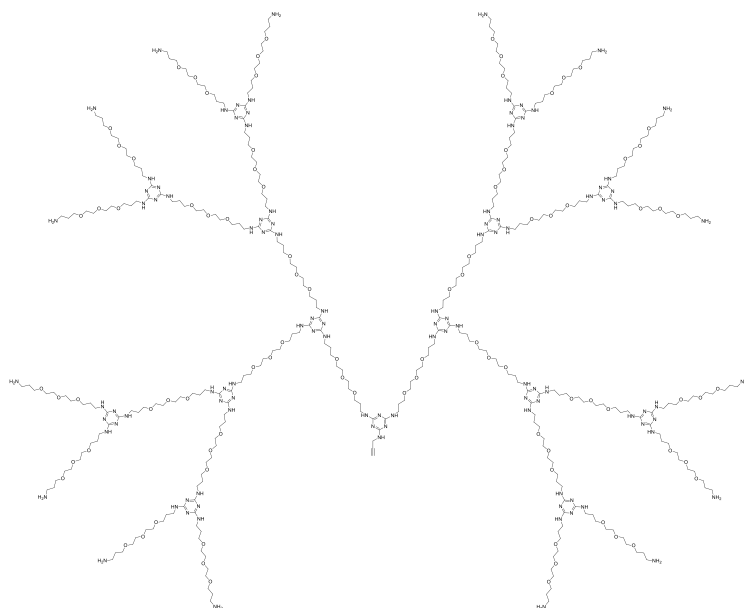

Figure S37.  $^1\text{H}$  NMR Spectrum of **13**.

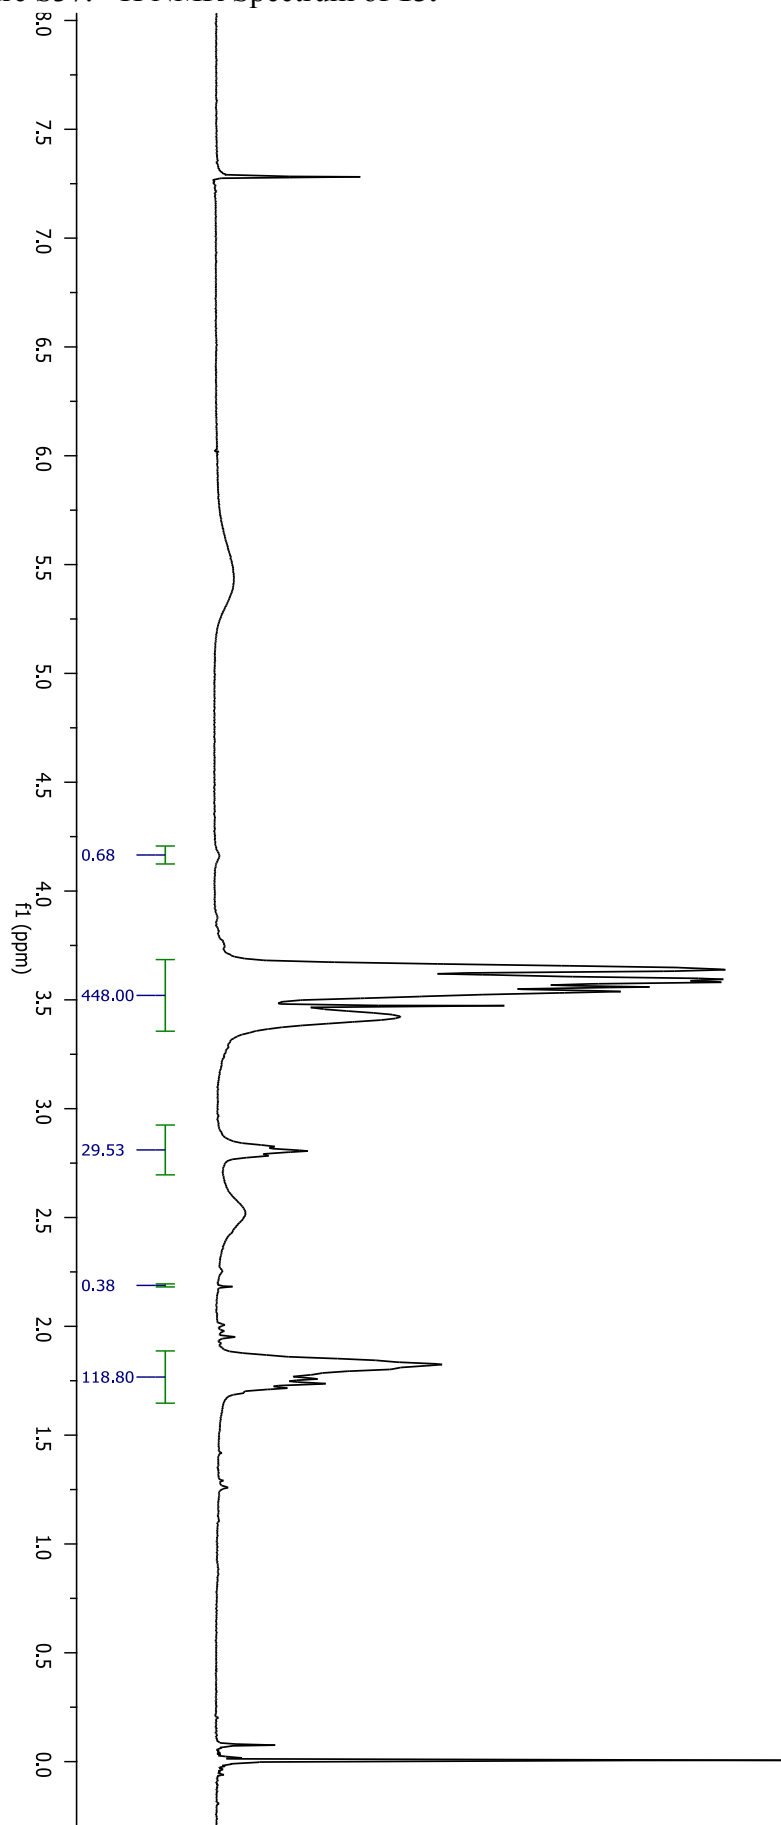

Figure S38.  $^{13}\text{C}$  NMR Spectrum of **13**.

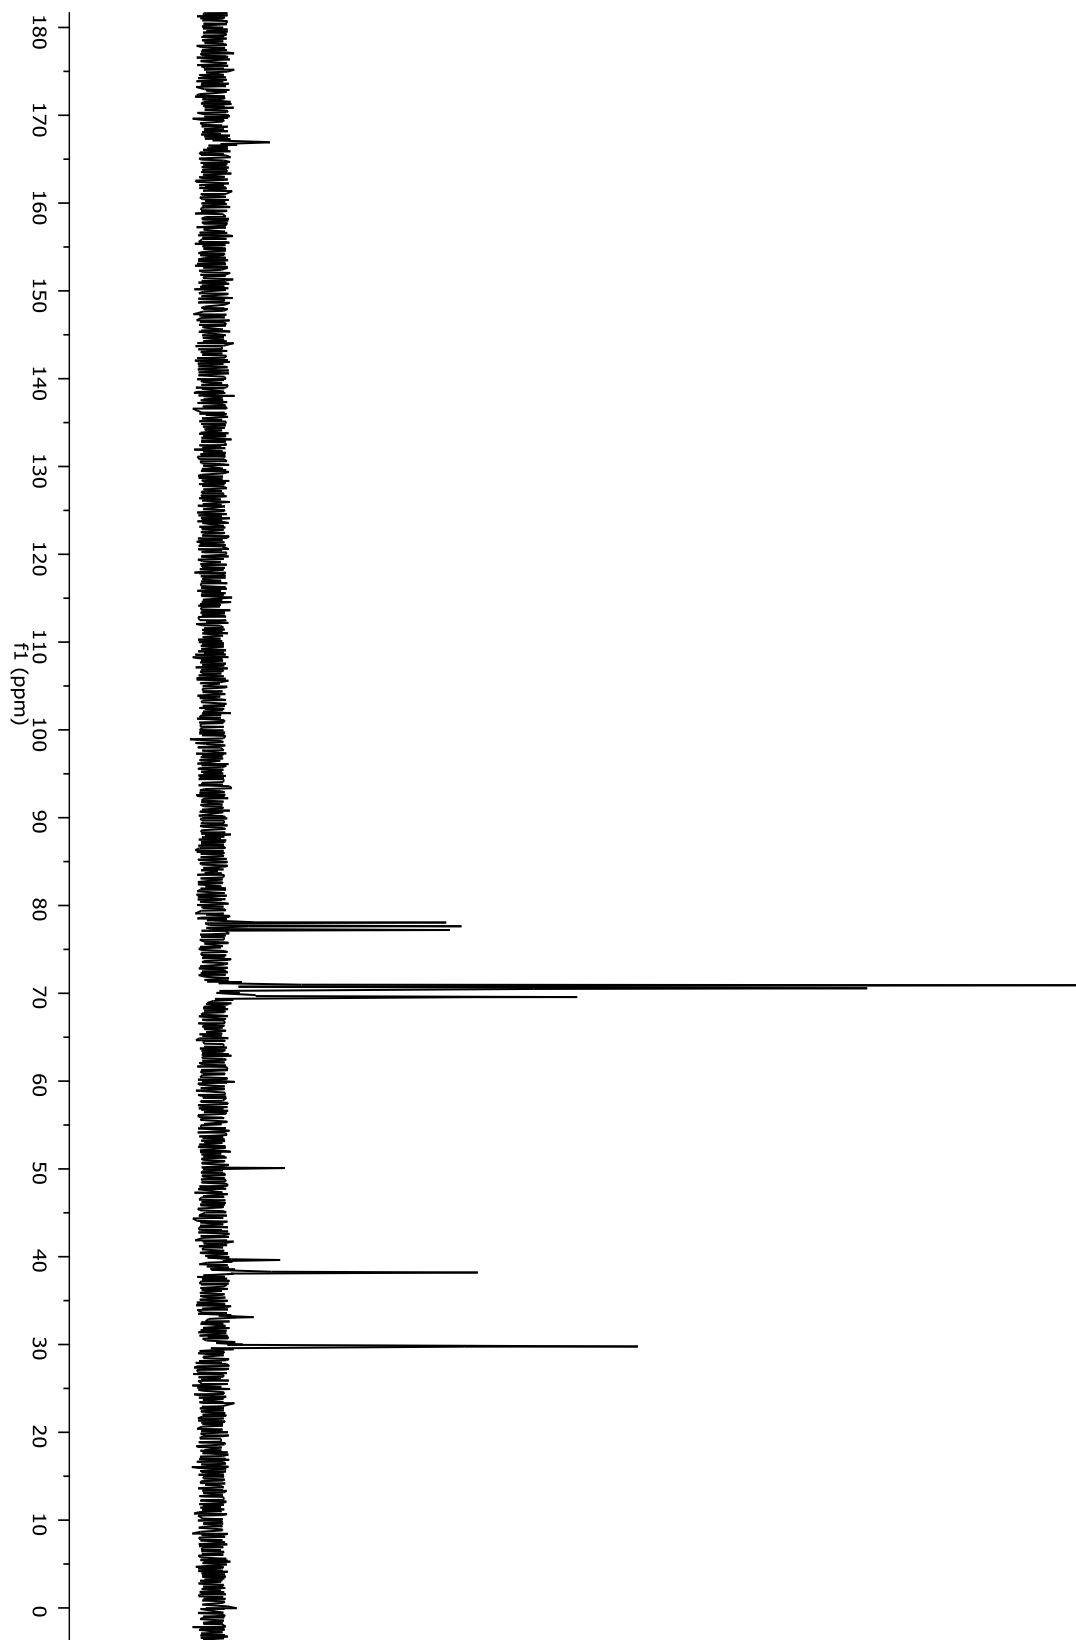

Figure S39. Mass Spectrum of **13**.

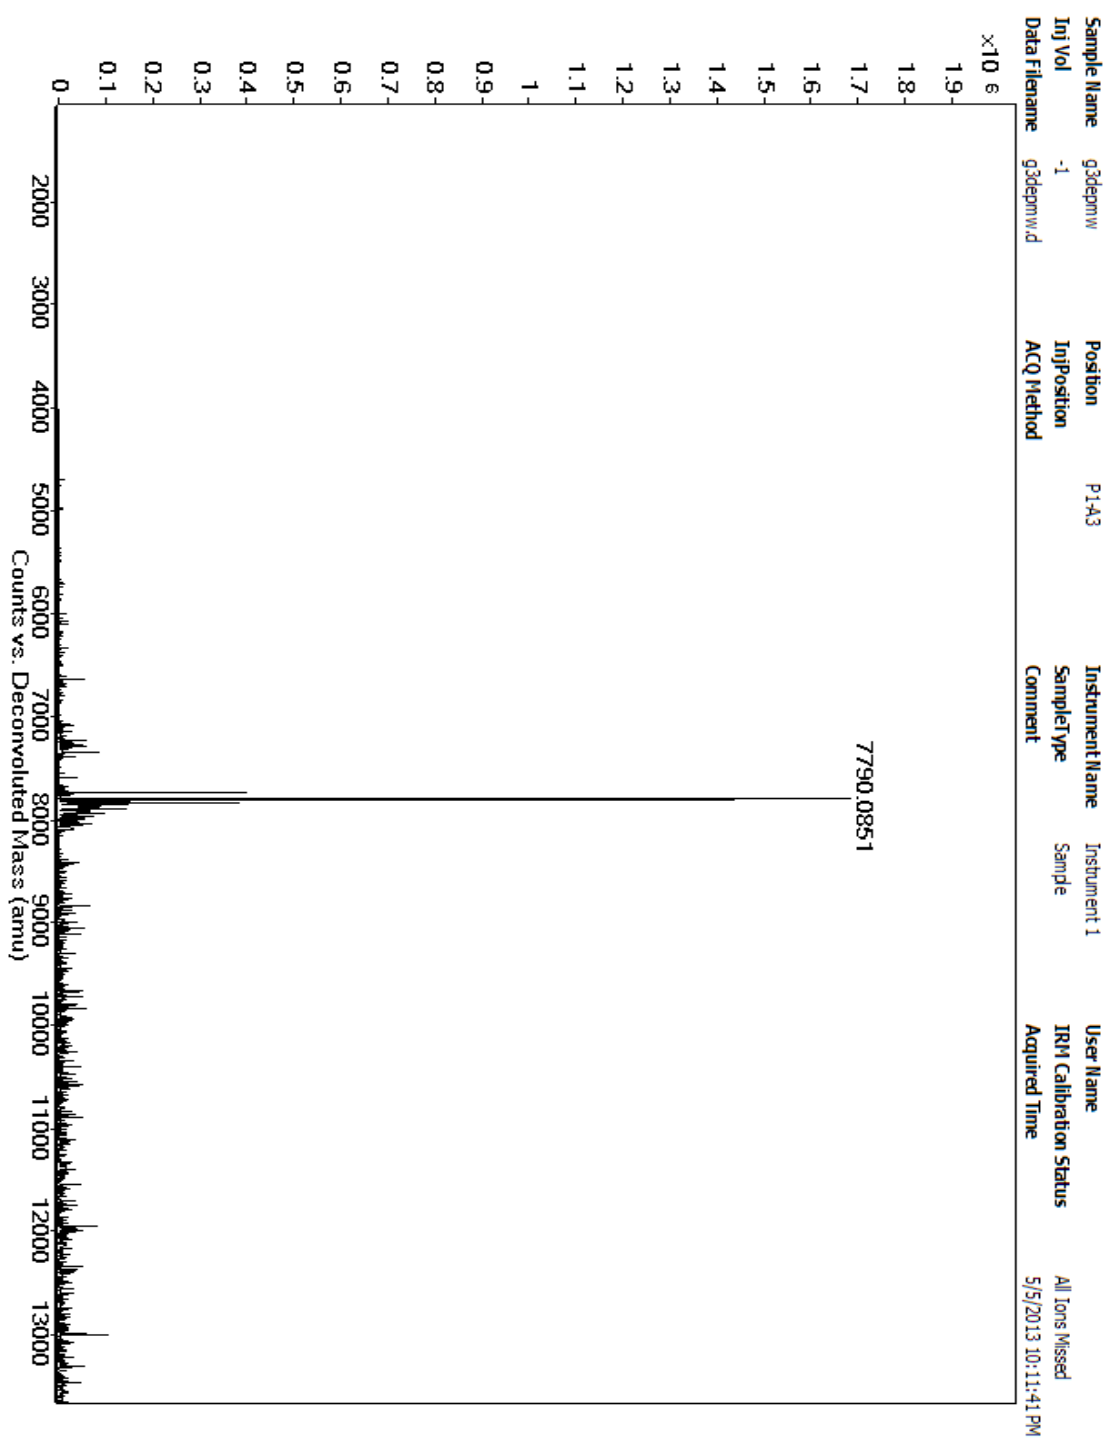

**Compound 14.** To a mixture of **Compound 3** (150 mg, 0.075 mmol) and 4-(2-azidoethyl)phenol (19 mg, 0.074 mmol) in Terbutanol (TEBOL, 0.8 mL), a solution of  $\text{CuSO}_4 \cdot 5\text{H}_2\text{O}$  (4.5 mg, 0.019 mmol) in water (0.3 mL) followed by sodium-L-ascorbate (18 mg, 0.09 mmol) was added at room temperature and stirred for 4h. Then, the solution was diluted with dichloromethane (20 mL) and washed three times with 1mM EDTA (20 mL), brine, dried over  $\text{MgSO}_4$  and concentrated. The crude product was purified by column chromatography (DCM:MeOH = 97:3  $\rightarrow$  DCM:MeOH = 9:1; to give **14** as a white wax (132 mg, 81 %).  $^1\text{H}$  NMR (400 MHz,  $\text{CDCl}_3$ )  $\delta$  7.13 (s, 1H, from triazole), 6.79-6.77 (d,  $J = 7.2$ , 2H, HO-C-CH=CH-C), 6.72-6.7 (d,  $J = 8.0$ , 2H, HO-C-CH=CH-C), 4.48-4.47 (t,  $J = 6.1$ , 2H, NH-CH<sub>2</sub>-triazole), 3.65-3.43 (m, 88H, CH<sub>2</sub>OCH<sub>2</sub>CH<sub>2</sub>OCH<sub>2</sub>CH<sub>2</sub>OCH<sub>2</sub>, C<sub>3</sub>N<sub>3</sub>-NHCH<sub>2</sub>CH<sub>2</sub>CH<sub>2</sub>O), 3.21 (br, m, 8H, BocNHCH<sub>2</sub>), 3.04 (m, 2H, triazole-N-CH<sub>2</sub>-CH<sub>2</sub>-phenol), 1.83-1.70 (m, 24H, OCH<sub>2</sub>CH<sub>2</sub>CH<sub>2</sub>), 1.44 (s, 36H, C(CH<sub>3</sub>)<sub>3</sub>);  $^{13}\text{C}$  NMR (100 MHz,  $\text{CDCl}_3$ )  $\delta$  164.75 (C<sub>3</sub>N<sub>3</sub>), 164.69 (C<sub>3</sub>N<sub>3</sub>), 156.05 (CO), 145.6 (HO-C), 129.9 (CH<sub>2</sub>C=CH-CH=CH-C-OH), 127.77 (CH<sub>2</sub>C=CH-CH=CH-C-OH), 122.61 (CH from triazole), 115.84 (CH<sub>2</sub>C=CH-CH=CH-C-OH), 78.7 (C(CH<sub>3</sub>)<sub>3</sub>), 70.5 (OCH<sub>2</sub>CH<sub>2</sub>O), 70.2 (two lines, OCH<sub>2</sub>CH<sub>2</sub>O), 69.5 (CH<sub>2</sub>CH<sub>2</sub>CH<sub>2</sub>O), 69.3 (CH<sub>2</sub>CH<sub>2</sub>CH<sub>2</sub>O), 51.83 (phenol-CH<sub>2</sub>CH<sub>2</sub>-Triazole), 38.38 (CH<sub>2</sub>CH<sub>2</sub>CH<sub>2</sub>O), 38.1 (CH<sub>2</sub>CH<sub>2</sub>CH<sub>2</sub>O), 35.83 (phenol-CH<sub>2</sub>CH<sub>2</sub>-Triazole), 29.53 (NHCH<sub>2</sub>CH<sub>2</sub>CH<sub>2</sub>O), 28.40 (C(CH<sub>3</sub>)<sub>3</sub>); MS (ESI-TOF) calcd for C<sub>100</sub>H<sub>181</sub>N<sub>25</sub>O<sub>27</sub> 2164.36, found 2165.66 (M + H)<sup>+</sup>.

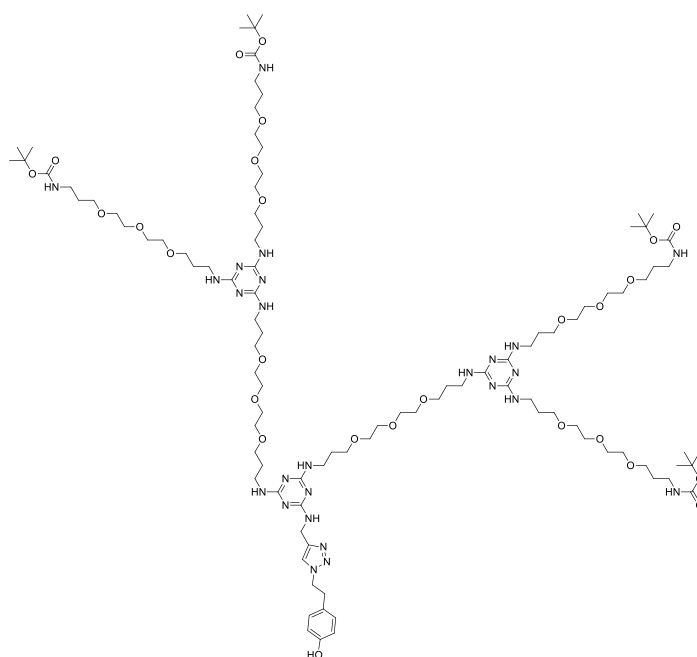



Figure S40.  $^1\text{H}$  NMR Spectrum of **14**.

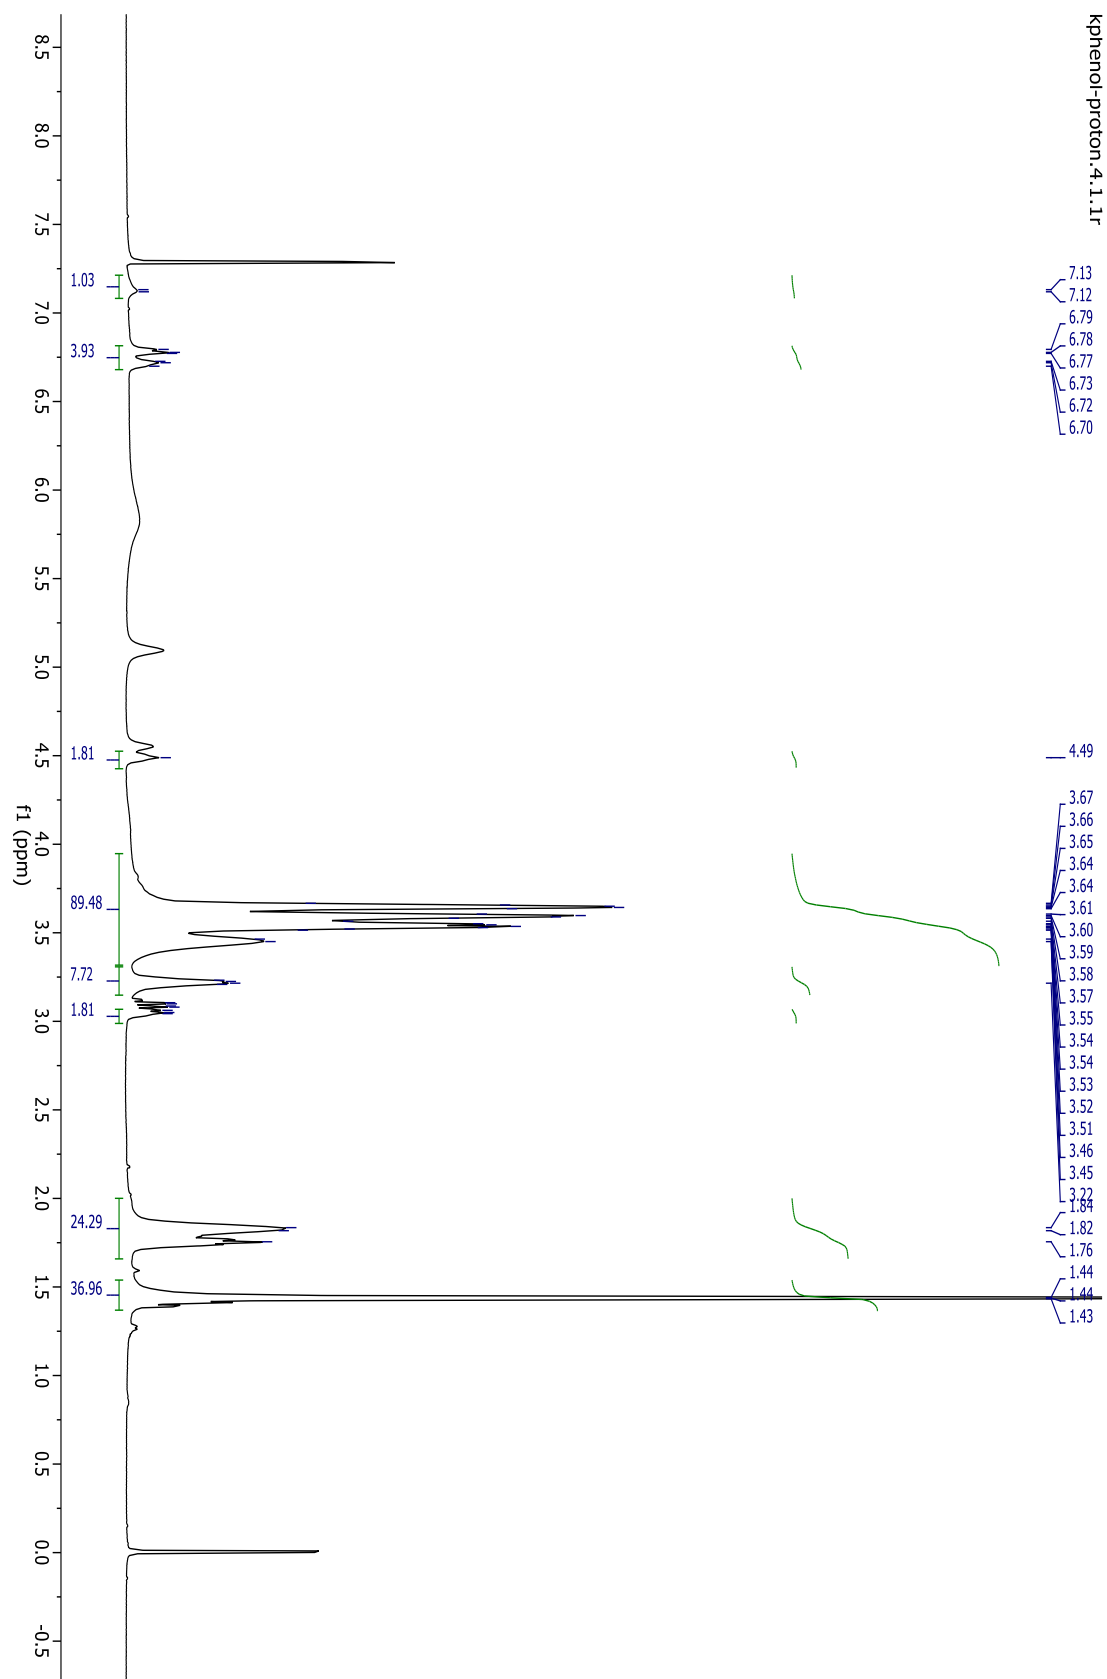

Figure S41.  $^{13}\text{C}$  NMR Spectrum of **14**.

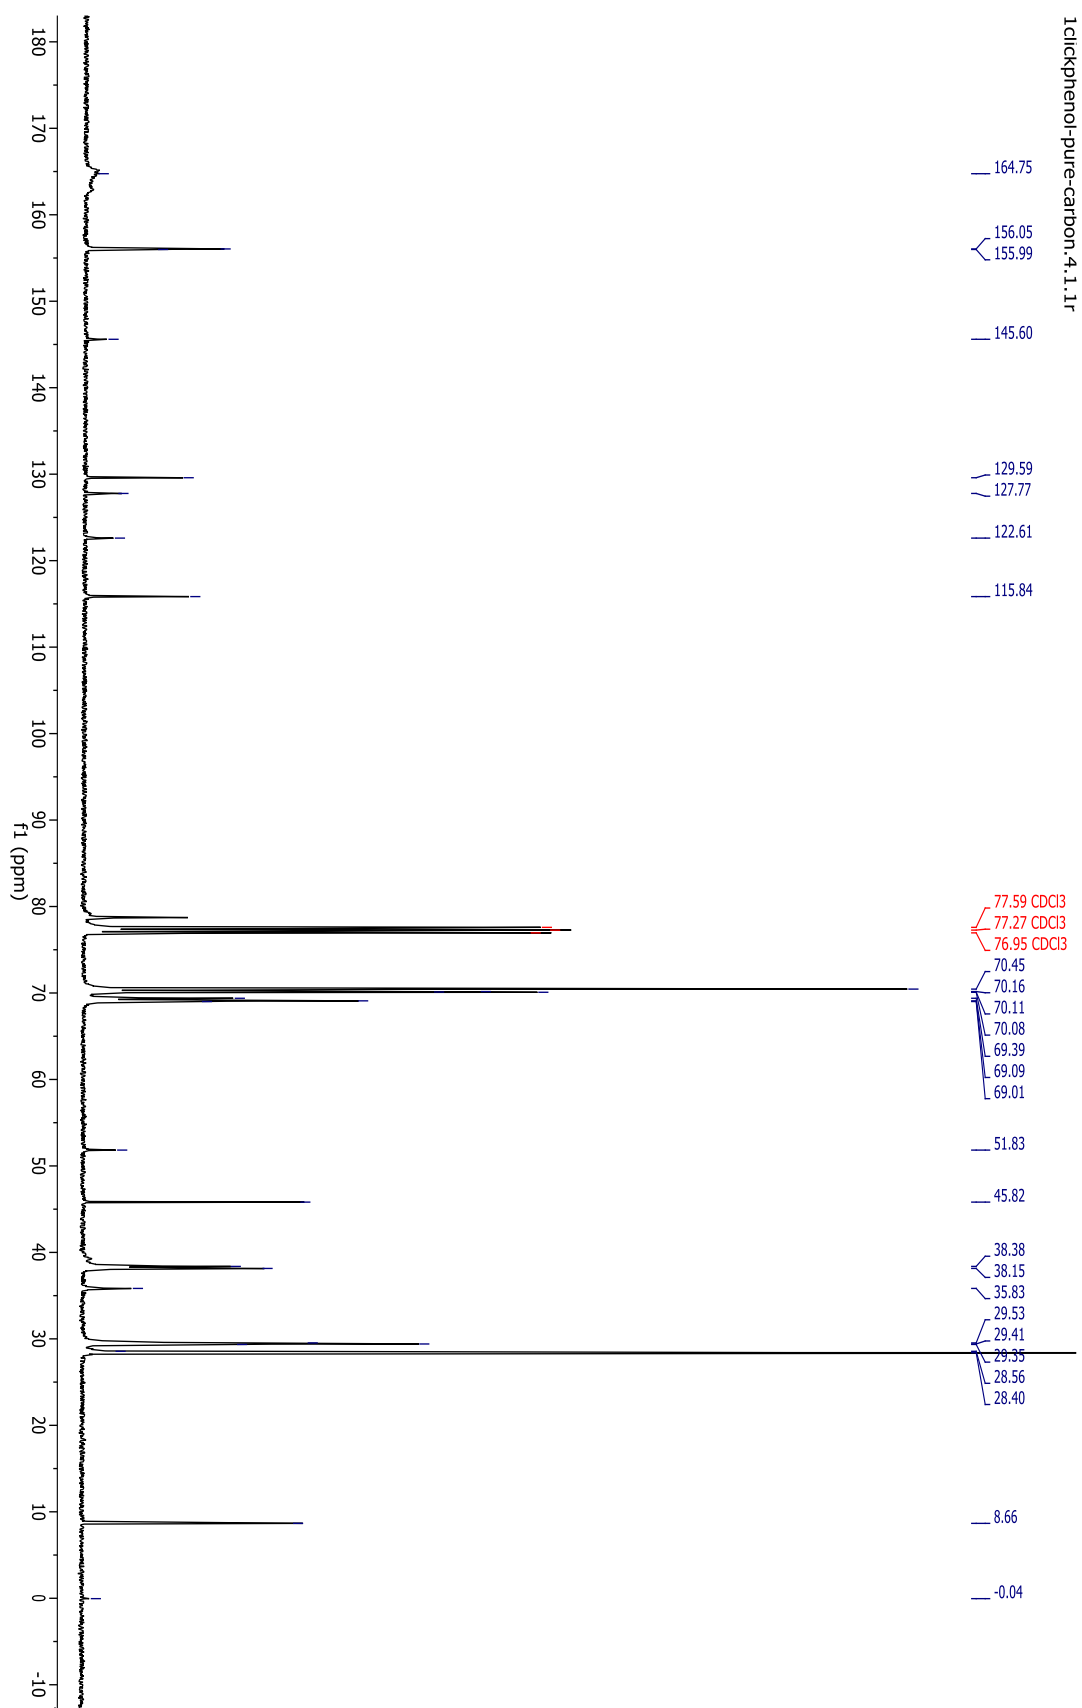

Figure S42. Mass Spectrum of 14.

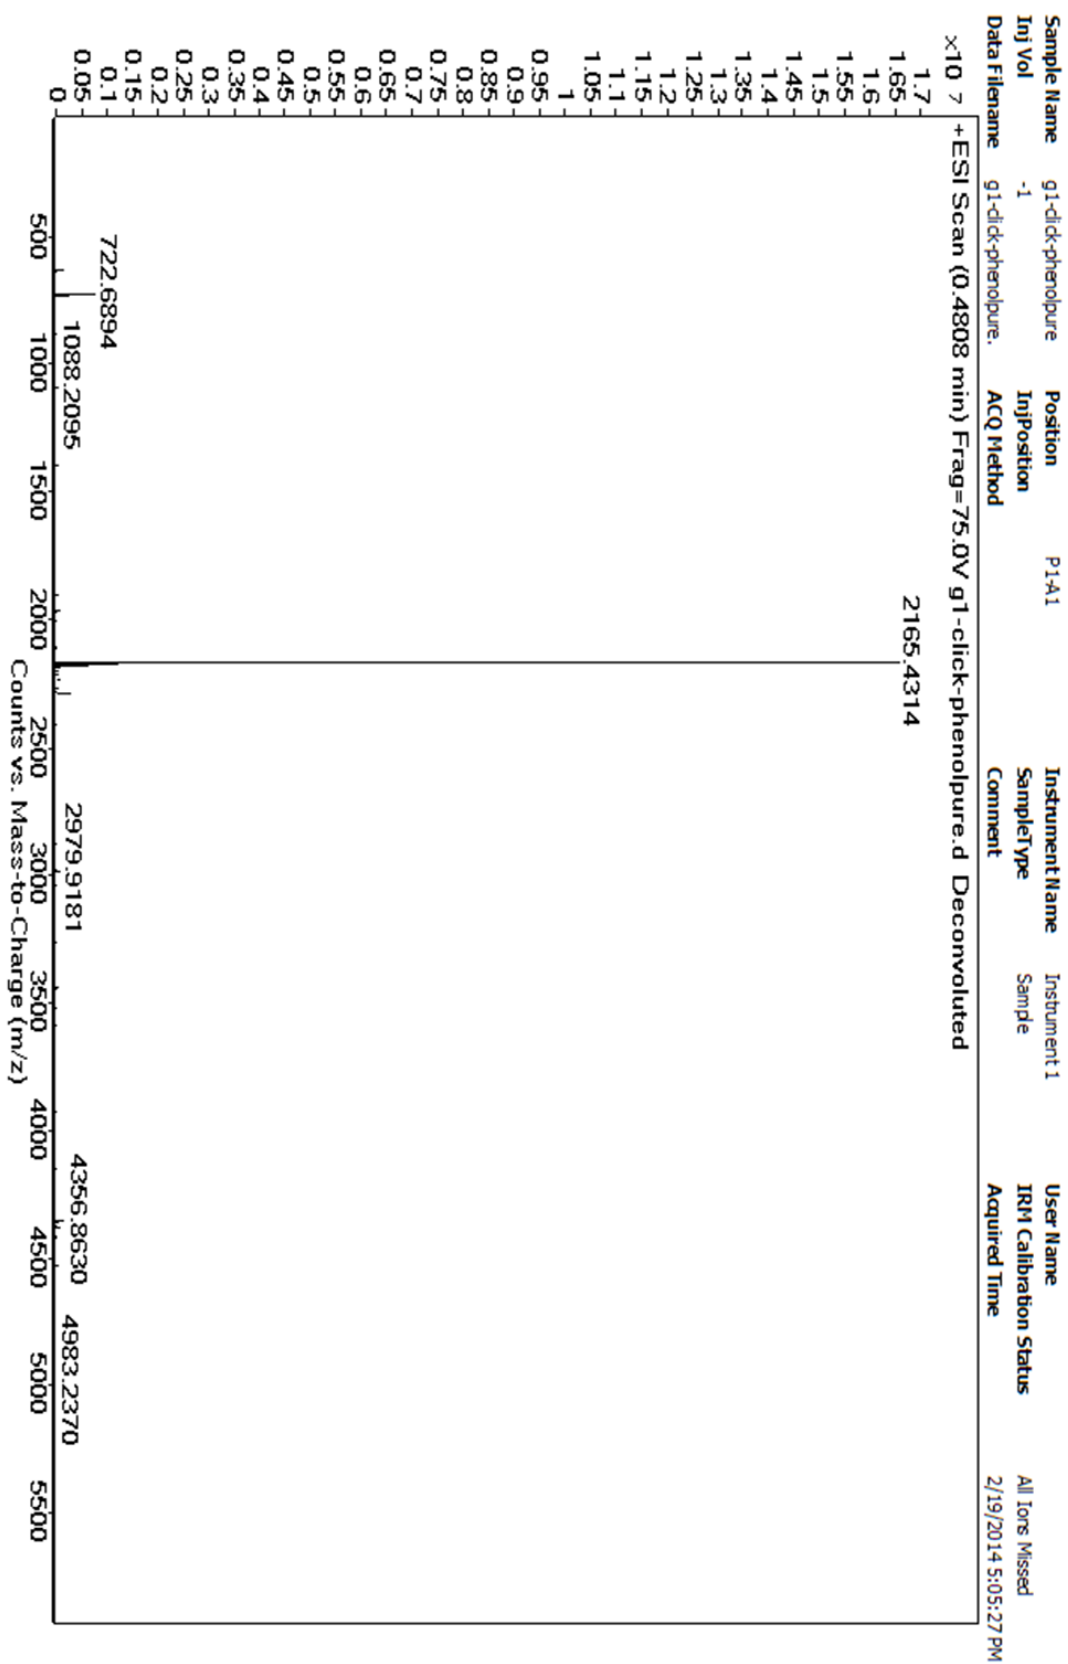

Figure S43. GPC Traces Compound 3.

1/21/2014 10:18:58 1 / 2

==== Shimadzu LcSolution Analysis Report ====

C:\LabSolutions\Data\SCAAC\TCU\01162014\data\G1C1\_1A.lcd  
 Sample Name : G1C1  
 Sample ID : G1C1  
 Injection Volume : 50 uL  
 Data File Name : G1C1\_1A.lcd  
 Data Acquired : 1/17/2014 5:32:42 PM  
 Data Processed : 1/21/2014 10:10:14 AM  
 G1C1 dissolved in THF, concentration is 1mg/mL, Mobile phase is THF running at 1.0 mL/min

<Chromatogram>

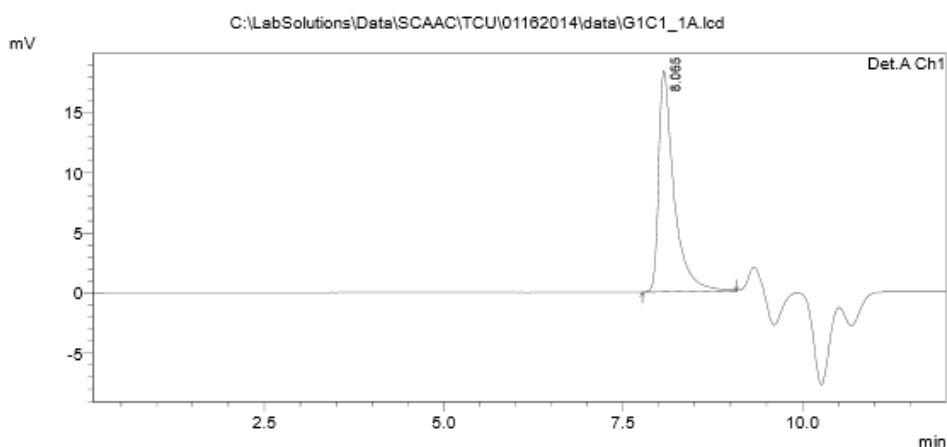

1 Det.A Ch1/

GPC Calibration Curve

Method File : C:\LabSolutions\Data\SCAAC\TCU\01162014\data\calibration.lcm  
 Curve Fit Type : Linear  
 Function :  $f(x) = -1.008573 * x + 11.53593$   
 $R^2 = 0.9960443$   
 Dispersion = 0.0292156  
 Mark-Houwink : No  
 Sensitivity Compensation (RID) : No  
 IS Correction : No  
 GPC Control Sample Correction : No  
 Average time for the same M.W : Yes  
 Time Conversion : No

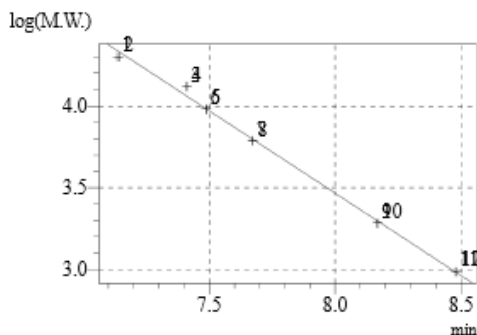

| #  | Time(min) | Molecular Weight |
|----|-----------|------------------|
| 1  | 7.135     | 20000            |
| 2  | 7.142     | 20000            |
| 3  | 7.411     | 13200            |
| 4  | 7.412     | 13200            |
| 5  | 7.486     | 9580             |
| 6  | 7.486     | 9580             |
| 7  | 7.670     | 6140             |
| 8  | 7.674     | 6140             |
| 9  | 8.167     | 1920             |
| 10 | 8.168     | 1920             |
| 11 | 8.477     | 972              |
| 12 | 8.482     | 972              |

C:\LabSolutions\Data\SCAAC\TCU\01162014\data\G1C1\_1A.lcd

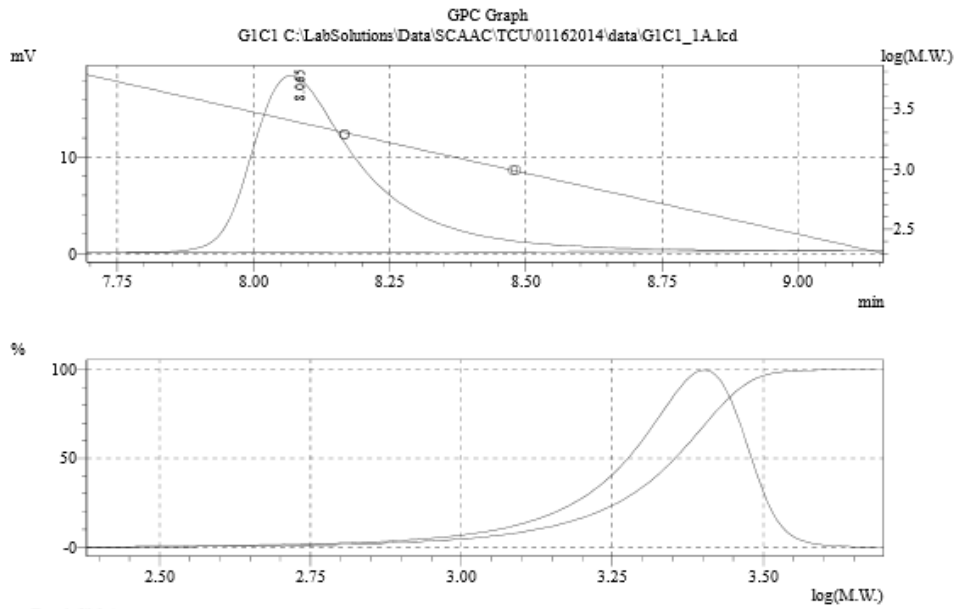

Det.A Ch1 /

GPC Summary

Chromatogram Det.A Ch1

| # | Title       | Mn    | Mw    | Mz    | Mz1   | Mv    | Mw/Mn   | Mz/Mw   |
|---|-------------|-------|-------|-------|-------|-------|---------|---------|
| 1 | G1C1_1A.lcd | 1941  | 2206  | 2380  | 2508  | 0     | 1.13665 | 1.07870 |
|   | Average     | 1941  | 2206  | 2380  | 2508  | 0     | 1.13665 | 1.07870 |
|   | %RSD        | 0.000 | 0.000 | 0.000 | 0.000 | 0.000 | 0.000   | 0.000   |
|   | Maximum     | 1941  | 2206  | 2380  | 2508  | 0     | 1.13665 | 1.07870 |
|   | Minimum     | 1941  | 2206  | 2380  | 2508  | 0     | 1.13665 | 1.07870 |
|   | SD          | 0     | 0     | 0     | 0     | 0     | 0.00000 | 0.00000 |

Figure S44. GPC Traces of Compound 5.

1/21/2014 10:20:30 1 / 2

==== Shimadzu LCsolution Analysis Report ====

C:\LabSolutions\Data\SCAAC\TCU\01162014\data\G2C1\_1A.lcd  
 Sample Name : G2C1  
 Sample ID : G2C1  
 Injection Volume : 50 uL  
 Data File Name : G2C1\_1A.lcd  
 Data Acquired : 1/17/2014 5:57:40 PM  
 Data Processed : 1/21/2014 10:12:20 AM  
 G2C1 dissolved in THF, concentration is 1mg/mL, Mobile phase is THF running at 1.0 mL/min

<Chromatogram>

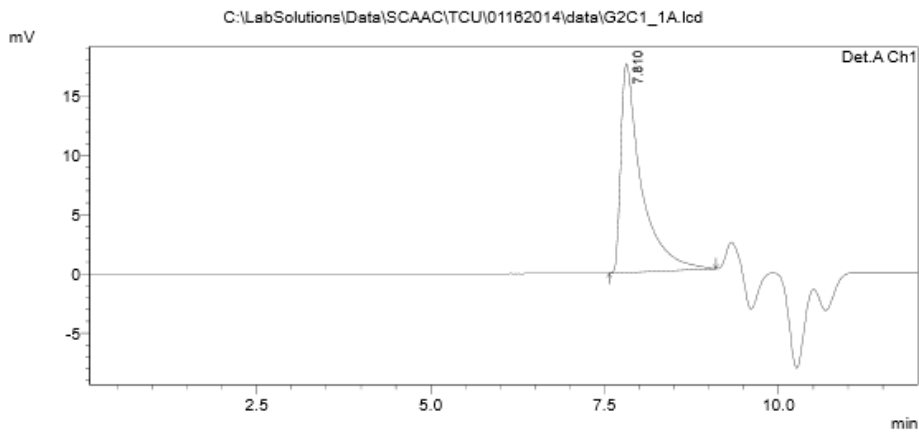

1 Det.A Ch1/

GPC Calibration Curve

Method File : C:\LabSolutions\Data\SCAAC\TCU\01162014\data\calibration1.lcm  
 Curve Fit Type : Linear  
 Function :  $f(x) = -1.008573 * x + 11.53593$   
 $R^2 = 0.9960443$   
 Dispersion = 0.0292156  
 Mark-Houwink : No  
 Sensitivity Compensation (RID) : No  
 IS Correction : No  
 GPC Control Sample Correction : No  
 Average time for the same M.W : Yes  
 Time Conversion : No

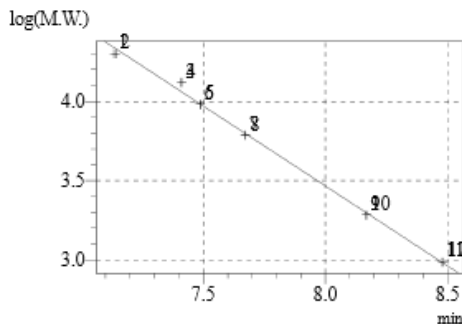

| #  | Time(min) | Molecular Weight |
|----|-----------|------------------|
| 1  | 7.135     | 20000            |
| 2  | 7.142     | 20000            |
| 3  | 7.411     | 13200            |
| 4  | 7.412     | 13200            |
| 5  | 7.486     | 9580             |
| 6  | 7.486     | 9580             |
| 7  | 7.670     | 6140             |
| 8  | 7.674     | 6140             |
| 9  | 8.167     | 1920             |
| 10 | 8.168     | 1920             |
| 11 | 8.477     | 972              |
| 12 | 8.482     | 972              |

C:\LabSolutions\Data\SCAAC\TCU\01162014\data\G2C1\_1A.lcd

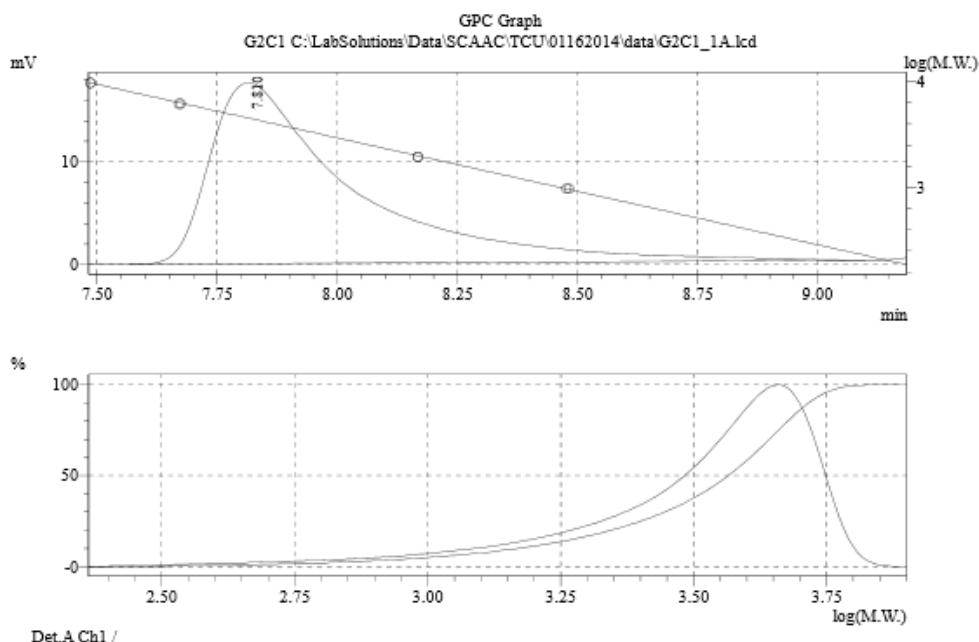

Det.A Ch1 /

GPC Summary

Chromatogram Det.A Ch1

| # | Title       | Mn    | Mw    | Mz    | Mz1   | Mv    | Mw/Mn   | Mz/Mw   |
|---|-------------|-------|-------|-------|-------|-------|---------|---------|
| 1 | G2C1_1A.lcd | 2606  | 3546  | 4096  | 4442  | 0     | 1.36056 | 1.15519 |
|   | Average     | 2606  | 3546  | 4096  | 4442  | 0     | 1.36056 | 1.15519 |
|   | %RSD        | 0.000 | 0.000 | 0.000 | 0.000 | 0.000 | 0.000   | 0.000   |
|   | Maximum     | 2606  | 3546  | 4096  | 4442  | 0     | 1.36056 | 1.15519 |
|   | Minimum     | 2606  | 3546  | 4096  | 4442  | 0     | 1.36056 | 1.15519 |
|   | SD          | 0     | 0     | 0     | 0     | 0     | 0.00000 | 0.00000 |

C:\LabSolutions\Data\SCAAC\TCU\01162014\data\G2C1\_1A.lcd

Figure S45. GPC Traces of Compound 7.

1/21/2014 10:22:57 1 / 2

==== Shimadzu LCsolution Analysis Report ====

C:\LabSolutions\Data\SCAAC\TCU\01162014\data\G3C1\_1A.lcd  
 Sample Name : G3C1  
 Sample ID : G3C1  
 Injection Volume : 50 uL  
 Data File Name : G3C1\_1A.lcd  
 Data Acquired : 1/17/2014 6:22:37 PM  
 Data Processed : 1/17/2014 11:29:12 PM  
 G3C1 dissolved in THF, concentration is 1mg/mL, Mobile phase is THF running at 1.0 mL/min

<Chromatogram>

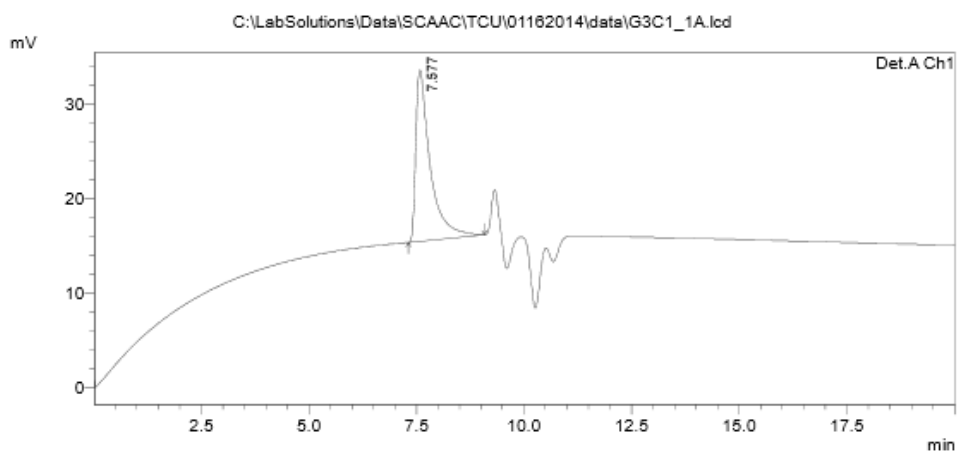

1 Det.A Ch1/

GPC Calibration Curve

Method File : C:\LabSolutions\Data\SCAAC\TCU\01162014\data\calibration.lcm  
 Curve Fit Type : Linear  
 Function :  $f(x) = -1.008573 * x + 11.53593$   
 $R^2 = 0.9960443$   
 Dispersion = 0.0292156  
 Mark-Houwink : No  
 Sensitivity Compensation (RID) : No  
 IS Correction : No  
 GPC Control Sample Correction : No  
 Average time for the same M.W : Yes  
 Time Conversion : No

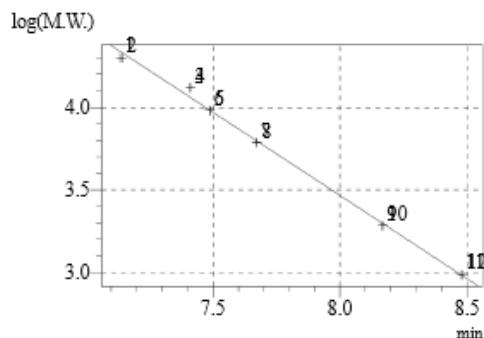

| #  | Time(min) | Molecular Weight |
|----|-----------|------------------|
| 1  | 7.135     | 20000            |
| 2  | 7.142     | 20000            |
| 3  | 7.411     | 13200            |
| 4  | 7.412     | 13200            |
| 5  | 7.486     | 9580             |
| 6  | 7.486     | 9580             |
| 7  | 7.670     | 6140             |
| 8  | 7.674     | 6140             |
| 9  | 8.167     | 1920             |
| 10 | 8.168     | 1920             |
| 11 | 8.477     | 972              |
| 12 | 8.482     | 972              |

C:\LabSolutions\Data\SCAAC\TCU\01162014\data\G3C1\_1A.lcd



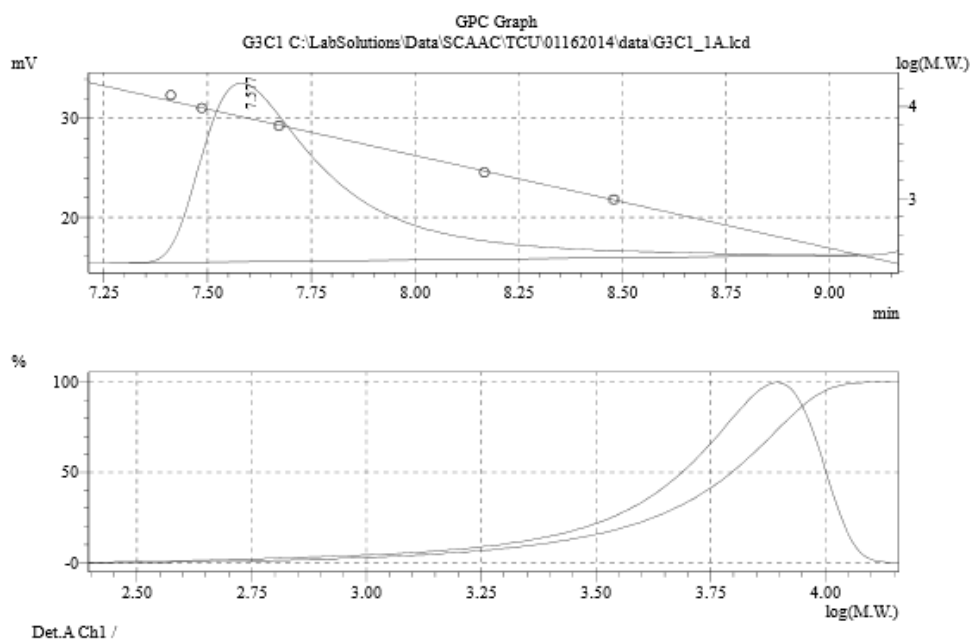

**GPC Summary**

Chromatogram Det.A Ch1

| # | Title       | Mn    | Mw    | Mz    | Mz1   | Mv    | Mw/Mn   | Mz/Mw   |
|---|-------------|-------|-------|-------|-------|-------|---------|---------|
| 1 | G3C1_1A.lcd | 4127  | 6096  | 7178  | 7854  | 0     | 1.47700 | 1.17756 |
|   | Average     | 4127  | 6096  | 7178  | 7854  | 0     | 1.47700 | 1.17756 |
|   | %RSD        | 0.000 | 0.000 | 0.000 | 0.000 | 0.000 | 0.000   | 0.000   |
|   | Maximum     | 4127  | 6096  | 7178  | 7854  | 0     | 1.47700 | 1.17756 |
|   | Minimum     | 4127  | 6096  | 7178  | 7854  | 0     | 1.47700 | 1.17756 |
|   | SD          | 0     | 0     | 0     | 0     | 0     | 0.00000 | 0.00000 |

Figure S45. GPC-THF Blank Injection.

1/21/2014 13:46:45 1 / 1

==== Shimadzu LCsolution Analysis Report ====

C:\LabSolutions\Data\SCAAC\TCU\01162014\data\thf4.lcd  
Sample Name : thf  
Sample ID : thf  
Injection Volume : 50 uL  
Data File Name : thf4.lcd  
Data Acquired : 1/21/2014 1:24:05 PM  
Data Processed : 1/21/2014 1:44:07 PM  
thf blank; Mobile phase is THF running at 1.0 mL/min  
using Agilent PLgel Mixed C column (8.0x300mm, 5uM) no guard

<Chromatogram>

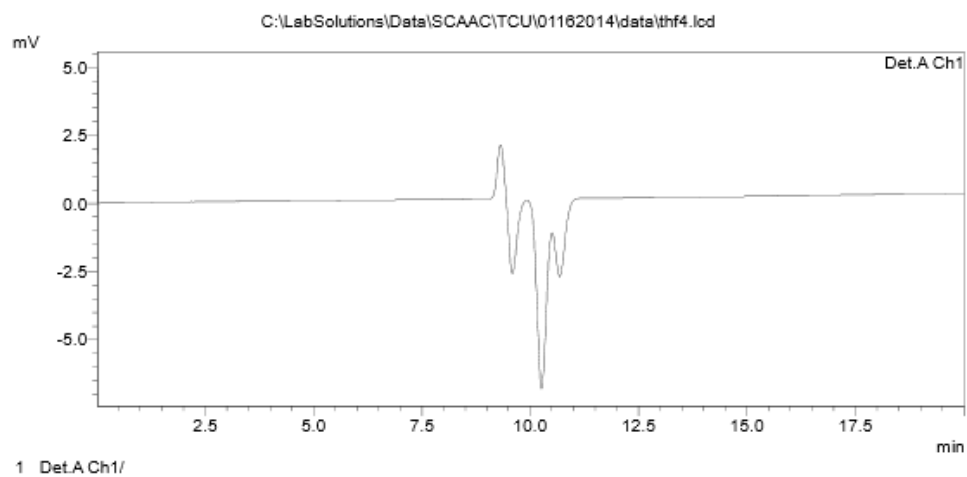

Supplement: c4py00349g1.pdf [file c4py00349g1.pdf]
